# Supplementary material for: Binuclear iridium(iii) complexes for efficient near-infrared light-emitting electrochemical cells with electroluminescence up to 800 nm
Source: Royal Society of Chemistry journal article supplement (doi:10.1039/d4tc02040e), 2024-01-01
Supplement: d4tc02040e1.pdf [file d4tc02040e1.pdf]

## Electronic Supplementary Information

for

### Binuclear Iridium(III) Complexes for Efficient Near-Infrared Light-Emitting Electrochemical Cells with Electroluminescence up to 800 nm

Lavinia Ballerini,<sup>a</sup> Wei-Min Zhang,<sup>b</sup> Thomaz Groizard,<sup>c</sup> Christophe Gourlaouen,<sup>c</sup> Federico Polo,<sup>d,e</sup> Abdelaziz Jouaiti,<sup>f,\*</sup> Hai-Ching Su,<sup>b,\*</sup> and Matteo Mauro<sup>a,\*</sup>

<sup>a</sup> *Institut de Physique et Chimie des Matériaux de Strasbourg (IPCMS) UMR7504,  
Université de Strasbourg & CNRS, 23 rue du Loess, 67083 Strasbourg (France)  
E-mail: [mauro@unistra.fr](mailto:mauro@unistra.fr)*

<sup>b</sup> *Institute of Lighting and Energy Photonics, National Yang Ming Chiao Tung University,  
Tainan 71150, Taiwan  
E-mail: [haichingsu@nycu.edu.tw](mailto:haichingsu@nycu.edu.tw)*

<sup>c</sup> *Laboratoire de Chimie Quantique, Institut de Chimie de Strasbourg UMR7177,  
Université de Strasbourg & CNRS, Rue Blaise Pascal, 67008 Strasbourg (France)*

<sup>d</sup> *Department of Molecular Sciences and Nanosystems,  
Ca' Foscari University of Venice  
Via Torino 155, 30172 Venezia (Italy)*

<sup>e</sup> *European Centre for Living Technology (ECLT), Ca' Bottacin, 30124, Venice, Italy*

<sup>f</sup> *Laboratoire de Synthèse et Fonctions des Architectures Moléculaires, UMR7140 Chimie  
de la Matière Complexe, Université de Strasbourg & CNRS  
4 rue Blaise, Pascal 67000 Strasbourg (France)  
E-mail: [jouaiti@unistra.fr](mailto:jouaiti@unistra.fr)*

## Table of Contents

|                                  | Page             |
|----------------------------------|------------------|
| <i>Experimental section</i>      | <i>S2 – S13</i>  |
| <i>Supplementary figures</i>     | <i>S14 – S21</i> |
| <i>Chemical characterization</i> | <i>S22 – S34</i> |
| <i>Supplementary tables</i>      | <i>S35 – S41</i> |

## Experimental section

### *General consideration.*

All procedures involving iridium complexes were carried out under an argon atmosphere using standard Schlenk techniques. Nuclear magnetic resonance spectra were recorded using a Bruker Avance III HD 500 MHz spectrometer equipped with a N<sub>2</sub> cryo-probe CPPBBO Prodigy at 298 K. <sup>1</sup>H and <sup>13</sup>C{<sup>1</sup>H} NMR spectra were calibrated to residual solvent signals. HR-ESI-MS spectra were recorded on a MicroToF Bruker equipped with an electrospray ionization source. IrCl<sub>3</sub> × nH<sub>2</sub>O, 2-phenylpyridine, 5-chloropyrazine-2-carbaldehyde, (3,5-di-*tert*-butylphenyl)boronic acid, dithiooxamide, Pd(PPh<sub>3</sub>)<sub>4</sub>, 2-aminothiophenol, 5-(3,5-di-*tert*-butylphenyl)pyrazine-2-carbaldehyde, AgPF<sub>6</sub>, KPF<sub>6</sub>, poly(methyl methacrylate) (PMMA) beads (M<sub>w</sub> = 35000), were purchased from Aldrich Chemicals, Acros or BLDPharm and used without further purification. The synthesis of **L1** and **L3** was carried out following previously reported procedures and the chemical analyses and reaction yields agrees well with the reported data.<sup>[S1]</sup>

### *Synthetic procedures.*

#### *Synthesis of 5-(3,5-di-*tert*-butylphenyl)pyrazine-2-carbaldehyde*

A mixture of 5-chloropyrazine-2-carbaldehyde (1.0 g, 7.0 mmol), Na<sub>2</sub>CO<sub>3</sub> (2.72 g, 25.6 mmol) and (3,5-di-*tert*-butylphenyl)boronic acid (2.12 g, 9.0 mmol) in 50 mL of a mixture 1,4-dioxane/H<sub>2</sub>O (4:1 v/v) was degassed by steady bubbling with argon for 20 minutes. Pd(PPh<sub>3</sub>)<sub>4</sub> (0.02 g, 0.018 mmol) was added and the mixture was refluxed 8 hours under argon. After cooling, the mixture was extracted with CH<sub>2</sub>Cl<sub>2</sub> (3×40 mL). The combined organic layers were washed with brine, dried over MgSO<sub>4</sub> and evaporated under vacuum. The residue was purified by silica gel column chromatography with petroleum ether/CH<sub>2</sub>Cl<sub>2</sub> mixture varying from 100:0 to 50:50 as eluent to provide the target compound as white solid (2.0 g, yield 96%). <sup>1</sup>H NMR (CDCl<sub>3</sub>, 300 MHz) δ: 10.21 (s, 1H), 9.23 (d, *J* = 1.2 Hz, 1H), 9.18 (d, *J* = 1.2 Hz, 1H), 7.96 (d,

$J = 1.8$  Hz, 2H), 7.66 (t,  $J = 1.8$  Hz, 1H), 1.48 (s, 18H).  $^{13}\text{C}$  NMR ( $\text{CDCl}_3$ , 125 MHz)  $\delta$ : 192.3, 157.1, 152.0, 144.8, 143.0, 142.1, 134.7, 125.6, 122.0, 35.1, 31.4. HR-MS (ESI):  $m/z$   $[\text{M} + \text{H}]^+$  calcd for  $\text{C}_{19}\text{H}_{25}\text{N}_2\text{O}$  297.1889, found 297.1954.

#### ***Synthesis of 2-(5-(3,5-di-tert-butylphenyl)pyrazin-2-yl)benzo[d]thiazole (L2)***

Two drops of glacial acetic acid were added to a mixture of 2-aminothiophenol (0.2 mL, 1.8 mmol) and 5-(3,5-di-tert-butylphenyl)pyrazine-2-carbaldehyde (0.55 g, 1.8 mmol) in ethanol (15 mL). The reaction mixture was refluxed with stirring for 7 hours. The precipitate formed after cooling was filtered off washed with MeOH and dried in air to provide the target compound **L2** as white solid (0.5 g, yield 53%).  $^1\text{H}$  NMR ( $\text{CDCl}_3$ , 300 MHz)  $\delta$ : 9.65 (s, 1H), 9.09 (s, 1H), 8.18 (d,  $J = 5$  Hz, 1H), 8.02 (d,  $J = 5$  Hz, 1H), 7.95 (d,  $J = 2.25$  Hz, 2H), 7.63 (t,  $J = 5$  Hz, 1H), 7.57 (td,  $J = 2.25$  Hz,  $J = 5$  Hz, 1H), 7.48 (td,  $J = 2.25$  Hz,  $J = 5$  Hz, 1H), 1.45 (s, 18H).  $^{13}\text{C}$  NMR ( $\text{CDCl}_3$ , 125 MHz)  $\delta$ : 166.9, 154.8, 154.4, 151.8, 144.5, 141.5, 141.4, 135.9, 135.3, 126.5, 126.0, 124.8, 123.8, 122.0, 121.6, 35.1, 31.5. HR-MS (ESI):  $m/z$   $[\text{M} + \text{H}]^+$  calcd for  $\text{C}_{25}\text{H}_{28}\text{N}_3\text{S}$  402.5720, found 402.1990.

#### ***Synthesis of ligand L4.***

Compound **L4** was prepared by a synthetic procedure similar to that previously employed by us for obtaining ligand **L3**<sup>[37]</sup> except for using the corresponding carbaldehyde 5-(3,5-di-tert-butylphenyl)pyrazine-2-carbaldehyde. Yield 86%.  $^1\text{H}$  NMR ( $\text{CDCl}_3$ , 500 MHz)  $\delta$ : 9.48 (s, 2 H); 9.02 (s, 2 H); 7.90 (d,  $J = 2$  Hz, 4 H); 7.59 (t,  $J = 2$  Hz, 2 H); 1.40 (s, 36 H).  $^{13}\text{C}$  NMR ( $\text{CDCl}_3$ , 125 MHz)  $\delta$ : 168.8, 154.6, 153.9, 151.9, 144.4, 141.5, 140.7, 135.2, 124.9, 121.5, 35.1, 31.5. HR-MS (ESI):  $m/z$   $[\text{M} + \text{H}]^+$  calcd for  $\text{C}_{40}\text{H}_{47}\text{N}_6\text{S}_2$ ,  $[\text{M} + \text{H}]^+$  675.3298, found 675.3290.

#### ***Synthesis of mononuclear complexes Ir-M1 and Ir-M2.***

To a one-neck round-bottom flask the starting dimer  $[\text{Ir}(\text{ppy})_2\text{Cl}]_2$  (250.0 mg, 0.233 mmol, 1 equiv.) was stirred overnight in 30 ml of MeOH in the dark at room temperature with  $\text{AgPF}_6$

(130.0 mg, 0.513 mmol, 2.2 equiv.). The AgCl formed was removed by filtration on Celite, and the resulting the *bis*-solvento complex was dried under reduced pressure and used without further purification for the second step. The solvato complex was reacted with two equiv. of ligand either **L1** or **L2** (187 mg, 0.466 mmol for **L1**, 187 mg, 0.466 mmol for **L2**) in 40 mL of a CH<sub>2</sub>Cl<sub>2</sub>/MeOH (1:1) mixture, and the latter was refluxed (55 °C) overnight. The crude was dried under reduced pressure and purified with silica gel chromatographic column using as eluent CH<sub>2</sub>Cl<sub>2</sub>/hexane (7:3) to CH<sub>2</sub>Cl<sub>2</sub>/MeOH (9:1). The pure fractions were than solubilized in 5 mL of CH<sub>2</sub>Cl<sub>2</sub>/MeOH (1:1) and the target complex precipitated with an aqueous saturated solution of KPF<sub>6</sub> and the obtained solid were washed with water (70 mL) and hexane (100 mL).

**Complex Ir-M1:** Light orange powder, 398 mg, 0.380 mmol (yield 82%). <sup>1</sup>H NMR (500 MHz, CD<sub>2</sub>Cl<sub>2</sub>) δ: 8.48 (d, *J* = 8.3 Hz, 1H), 8.41 (dd, *J* = 8.2, 1.4 Hz, 1H), 8.22 (s, 1H), 8.09 (d, *J* = 8.1 Hz, 1H), 8.00 (d, *J* = 8.1 Hz, 1H), 7.94 (d, *J* = 8.1 Hz, 1H), 7.85 – 7.74 (m, 4H), 7.69 (d, *J* = 5.5 Hz, 1H), 7.55 (dd, *J* = 11.7, 4.2 Hz, 3H), 7.26 (t, *J* = 7.7 Hz, 1H), 7.22 – 7.09 (m, 4H), 7.00 (dt, *J* = 16.0, 9.1 Hz, 5H), 6.46 (d, *J* = 7.5 Hz, 1H), 6.31 (d, *J* = 7.5 Hz, 1H), 1.31 (s, 18H). <sup>13</sup>C{<sup>1</sup>H} NMR (126 MHz, CD<sub>2</sub>Cl<sub>2</sub>) d: 169.9, 168.5, 167.8, 153.1, 151.2, 150.4, 150.1, 149.6, 149.2, 148.0, 147.7, 144.8, 144.3, 143.2, 139.0, 138.8, 137.3, 134.8, 133.9, 132.9, 131.8, 131.5, 131.1, 129.3, 128.8, 126.8, 125.5, 125.5, 125.1, 124.3, 124.0, 124.0, 123.7, 123.4, 123.1, 121.9, 120.6, 120.2, 35.6, 31.6. HR-ESI-MS: calcd. for [C<sub>48</sub>H<sub>44</sub>IrN<sub>4</sub>S]<sup>+</sup> 901.2910 m/z; found for ([M]<sup>+</sup>) 901.2916 m/z.

**Complex Ir-M2:** Dark red powder, 393 mg, 0.375 mmol (yield 81%). <sup>1</sup>H NMR (500 MHz, CD<sub>2</sub>Cl<sub>2</sub>) δ: 9.60 (s, 1H), 8.33 (s, 1H), 8.13 (d, *J* = 8.2 Hz, 1H), 8.00 (d, *J* = 8.1 Hz, 1H), 7.96 (d, *J* = 8.1 Hz, 1H), 7.88 – 7.76 (m, 4H), 7.68 – 7.61 (m, 4H), 7.61 – 7.55 (m, 2H), 7.29 (t, *J* = 7.7 Hz, 1H), 7.18 (t, *J* = 7.5 Hz, 2H), 7.10 – 6.98 (m, 5H), 6.44 (d, *J* = 7.5 Hz, 1H), 6.33 (d, *J* = 7.5 Hz, 1H), 1.32 (s, 18H). <sup>13</sup>C{<sup>1</sup>H} NMR (126 MHz, CD<sub>2</sub>Cl<sub>2</sub>) d: 168.2, 167.6, 167.1, 159.0, 153.0, 151.0, 150.5, 149.3, 147.1, 146.6, 146.5, 144.8, 144.5, 144.4, 141.6, 139.4, 139.2, 135.0,

133.1, 132.7, 131.9, 131.7, 131.2, 129.6, 129.3, 127.7, 125.6, 125.6, 124.7, 124.5, 124.2, 123.9, 123.8, 123.1, 122.5, 120.8, 120.4, 35.6, 31.6. HR-ESI-MS: calcd. for  $[\text{C}_{47}\text{H}_{43}\text{IrN}_5\text{S}]^+$  902.2863 m/z; found for  $([\text{M}]^+)$  902.2878 m/z.

### ***Synthesis of binuclear complexes Ir-D1 and Ir-D2.***

To a one-neck round-bottom flask the starting dimer  $[\text{Ir}(\text{ppy})_2\text{Cl}]_2$  (500.0 mg, 0.466 mmol, 1 equiv.) was stirred overnight in 30 ml of MeOH in the dark at room temperature with  $\text{AgPF}_6$  (259 mg, 1.026 mmol, 2.2 equiv.). The  $\text{AgCl}$  formed was removed by filtration on Celite, and the resulting the *bis*-solvento complex was dried under reduced pressure and used without further purification for the second step. The solvato complex was reacted with one equiv. of ligand either **L3** or **L4** (314 mg, 0.466 mmol for **L3**, 315 mg, 0.466 mmol for **L4**) in 56 mL of a  $\text{CH}_2\text{Cl}_2/\text{MeOH}$  (1:1) mixture, and the latter was refluxed (55 °C) overnight. The crude was dried under reduced pressure and purified with silica gel chromatographic column using as eluent  $\text{CH}_2\text{Cl}_2/\text{hexane}$  (4:6) to  $\text{CH}_2\text{Cl}_2$ . The pure fractions were than solubilized in 5 mL of  $\text{CH}_2\text{Cl}_2/\text{MeOH}$  (2:8) and the target complex precipitated with an aqueous saturated solution of  $\text{KPF}_6$  and the obtained solid were washed with water (70 mL) and hexane (100 mL).

**Complex Ir-D1:** Brown powder, 448 mg, 0.228 mmol (yield 49%).  $^1\text{H}$  NMR (500 MHz,  $\text{CD}_2\text{Cl}_2$ )  $\delta$ : 8.32–8.25 (m, 6H), 8.21 (d, 2H), 8.17 (d,  $J = 1.2$  Hz, 4H), 8.05 (d,  $J = 5.6$  Hz, 4H), 8.03 (d,  $J = 8.2$  Hz, 2H), 7.94 (ddt,  $J = 25.7, 15.9, 5.6$  Hz, 20H), 7.86 – 7.73 (m, 20H), 7.71 (d,  $J = 5.6$  Hz, 2H), 7.55 (d,  $J = 5.6$  Hz, 4H), 7.52 (d,  $J = 1.3$  Hz, 7H), 7.33 (dt,  $J = 22.0, 7.0$  Hz, 10H), 7.15 (t,  $J = 7.1$  Hz, 17H), 7.10 (dd,  $J = 15.7, 7.9$  Hz, 8H), 7.01 (d,  $J = 6.6$  Hz, 6H), 6.95 (dd,  $J = 16.2, 8.3$  Hz, 5H), 6.67 (d,  $J = 7.5$  Hz, 4H), 6.54 (d,  $J = 7.5$  Hz, 2H), 6.29 (d,  $J = 7.5$  Hz, 2H), 6.21 (d,  $J = 7.5$  Hz, 4H), 1.29 (s, 108H).  $^{13}\text{C}\{^1\text{H}\}$  NMR (126 MHz,  $\text{CD}_2\text{Cl}_2$ )  $\delta$ : 173.3, 173.2, 168.2, 167.8, 167.5, 167.0, 153.1, 153.0, 151.8, 150.3, 150.2, 150.0, 149.9, 149.8, 149.1, 148.9, 147.8, 147.4, 146.0, 145.7, 145.5, 145.2, 144.6, 144.4, 143.8, 143.6, 139.4, 139.3, 139.2, 139.1, 137.1, 137.0, 134.5, 134.1, 133.8, 133.7, 131.9, 131.8, 131.4, 131.3, 131.2, 125.9, 125.7,

125.6, 125.4, 125.4, 125.3, 125.2, 125.2, 124.9, 124.7, 124.6, 124.6, 124.3, 124.1, 124.0, 122.00, 122.0, 120.7, 120.6, 120.3, 120.0, 35.5, 31.6. HR-ESI-MS: calcd. for  $[\text{C}_{86}\text{H}_{80}\text{F}_6\text{Ir}_2\text{N}_8\text{PS}_2]^+$  1819.4842 m/z; found for  $([\text{M}]^+)$  1819.4881 m/z.

**Complex Ir-D2:** Dark green powder, 486 mg, 0.247 mmol (yield 53%).  $^1\text{H}$  NMR (500 MHz,  $\text{CD}_2\text{Cl}_2$ )  $\delta$ : 9.22 (s, 5H), 8.30 (d,  $J = 0.9$  Hz, 2H), 8.27 (d,  $J = 0.9$  Hz, 4H), 8.08 – 8.01 (m, 6H), 7.99 – 7.88 (m, 14H), 7.88 – 7.76 (m, 21H), 7.72 (d,  $J = 5.7$  Hz, 2H), 7.66 – 7.59 (m, 17H), 7.57 (d,  $J = 5.7$  Hz, 4H), 7.52 (d,  $J = 5.6$  Hz, 2H), 7.39 – 7.29 (m, 10H), 7.21 – 7.12 (m, 14H), 7.08 – 6.98 (m,  $J = 14.9, 6.7$  Hz, 12H), 6.66 (d,  $J = 7.5$  Hz, 4H), 6.56 (d,  $J = 7.5$  Hz, 2H), 6.33 (d,  $J = 7.5$  Hz, 2H), 6.26 (d,  $J = 7.5$  Hz, 4H), 1.31 (s, 108H).  $^{13}\text{C}\{^1\text{H}\}$  NMR (126 MHz,  $\text{CD}_2\text{Cl}_2$ )  $\delta$ : 171.2, 171.1, 167.9, 167.4, 167.2, 166.7, 159.3, 159.2, 153.0, 152.9, 152.1, 150.8, 150.7, 150.7, 150.6, 150.1, 146.5, 146.1, 145.8, 145.5, 145.0, 144.7, 144.6, 144.5, 143.9, 143.8, 141.7, 141.7, 139.6, 139.5, 139.4, 139.4, 134.3, 134.0, 133.1, 133.0, 132.0, 132.0, 131.5, 131.5, 131.4, 131.3, 127.9, 127.9, 126.1, 125.9, 125.8, 125.4, 125.3, 125.2, 125.1, 125.0, 124.5, 124.5, 124.4, 122.6, 122.5, 120.8, 120.8, 120.5, 120.2, 35.6, 31.5. HR-ESI-MS calcd. for  $[\text{C}_{84}\text{H}_{78}\text{F}_6\text{Ir}_2\text{N}_{10}\text{PS}_2]^+$  1821.4747 m/z; found for  $([\text{M}]^+)$  1821.4711 m/z.

### ***Photophysical measurements***

*Instrument details.* Absorption spectra were recorded using a Perkin Elmer Lambda 950 double-beam UV-VIS spectrophotometer and baseline corrected. Steady-state emission spectra were recorded on a Horiba Jobin–Yvon IBH FL-322 Fluorolog 3 spectrometer equipped with a 450 W xenon arc lamp, double-grating excitation, and emission monochromators (2.1 nm  $\text{mm}^{-1}$  of dispersion; 1200 grooves  $\text{mm}^{-1}$ ) and a Hamamatsu R13456 red sensitive Peltier-cooled PMT detector. Emission and excitation spectra were corrected for source intensity (lamp and grating) and emission spectral response (detector and grating) by standard correction curves. Time-resolved measurements were performed using either the Time-Correlated Single-Photon Counting (TCSPC) or the Multi-Channel Scaling (MCS) electronics option of the

TimeHarp 260 board installed on a PicoQuant FluoTime 300 fluorimeter (PicoQuant GmbH, Germany), equipped with a PDL 820 laser pulse driver. A pulsed laser diode LDH-P-C-375 ( $\lambda = 375$  nm, pulse full width at half maximum  $<50$  ps, repetition rate 200 kHz–40 MHz) was used to excite the sample and mounted directly on the sample chamber at  $90^\circ$ . The photons were collected by a PMA Hybrid-07 single photon counting detector. The data were acquired by using the commercially available software EasyTau II (PicoQuant GmbH, Germany), while data analysis was performed using the built-in software FluoFit (PicoQuant GmbH, Germany).

All the solvents were spectrophotometric grade. Deaerated samples were prepared by the freeze–pump–thaw technique by using a home-made quartz cuvette equipped with a Rotaflo stopcock. Luminescence quantum yields were measured in optically dilute solutions (optical density  $<0.1$  at the excitation wavelength) and compared to reference emitter by following the method of Demas and Crosby.<sup>[S2]</sup> The Ru(bpy)<sub>3</sub>Cl<sub>2</sub> complex in air-equilibrated water solution at room temperature was used as reference (PLQY = 0.04).<sup>[S3]</sup> Solid state PLQY values were recorded at a fixed excitation wavelength by using a Hamamatsu Photonics absolute PLQY measurements system Quantaaurus QY equipped with CW Xenon light source (150 W), monochromator, integrating sphere, C7473 photonics multi-channel analyzer and employing the commercially available U6039-05 PLQY measurement software (Hamamatsu Photonics Ltd., Shizuoka, Japan). All measurements were repeated five times at the excitation wavelength  $\lambda_{\text{exc}} = 400\text{--}425$  nm, unless otherwise stated.

*Methods.* For time resolved measurements, data fitting was performed by employing the maximum likelihood estimation (MLE) methods and the quality of the fit was assessed by inspection of the reduced  $\chi^2$  function and of the weighted residuals. For multi-exponential decays, the intensity, namely  $I(t)$ , has been assumed to decay as the sum of individual single exponential decays (Eqn. 4):



$$I(t) = \sum_{i=1}^n \alpha_i \exp\left(-\frac{t}{\tau_i}\right) \quad \text{eqn. 4}$$

where  $\tau_i$  are the decay times and  $\alpha_i$  are the amplitude of the component at  $t = 0$ . In the tables, the percentages to the pre-exponential factors,  $\alpha_i$ , are listed upon normalization.

Intensity average lifetimes were calculated by using the following equation (Eqn. 5):<sup>[S4]</sup>

$$\bar{\tau} = \frac{a_1 \tau_1^2 + a_2 \tau_2^2}{a_1 \tau_1 + a_2 \tau_2} \quad \text{eqn. 5}$$

### ***Electrochemical characterization***

The electrochemical properties of the complexes were assessed by means of cyclic voltammetry (CV). The CV experiments were carried out using a three-neck electrochemical cell in anhydrous and degassed dichloromethane/0.1M TBAPF<sub>6</sub> solution under an Ar atmosphere, using a 1 mM concentration for the iridium compound. Tetra-n-butylammonium hexafluorophosphate (TBAPF<sub>6</sub>, BLDpharm, 97%) was used as the supporting electrolyte and employed as received. The working electrode was a glassy-carbon (GC) disk electrode (3 mm diameter, BASMF2012 Sigma-Aldrich). The electrode was polished as already described elsewhere.<sup>[S5]</sup> Before experiments, the electrode was further polished with a 0.05 mm polycrystalline diamond suspension (Buehler, MetaDi) and electrochemically activated in the background solution by means of several voltammetric cycles at 0.5 Vs<sup>-1</sup> between the anodic and the cathodic solvent/electrolyte discharges, until the expected quality features were attained.<sup>[S6]</sup> One platinum wire served as the counter electrode and a silver wire was used as a quasi-reference electrode. At the end of each experiment, its potential was calibrated against the ferricenium/ferrocene couple, used as an internal redox standard. The solvent level was frequently checked and rinsed when necessary to avoid any change in the analyte concentration. A PalmSens4 potentiostat (PalmSens BV) was used for the CV experiments. The CV were blank-subtracted. The effect of the scan rate was investigated over the range 50–500 mV s<sup>-1</sup>, and the peak current was found to depend linearly on the square root of scan rate

for all compound, thus witnessing that the heterogeneous electron transfer process is diffusion-controlled. It is also worth noting that the peak-to-peak separation for all compound is in the range 90-120 mV (see Table 1 of the main text), which is larger than 59 mV expected for an ideal Nernstian behavior.<sup>[S5]</sup> However, the behavior of the redox couple ferrocene/ferricenium ( $\text{Fc}^+|\text{Fc}^0$ ), used as internal standard, showed the same trend. This effect can be attributed to the ohmic drop of the system, which could not be properly controlled by potentiostat.

Despite the concentrations of all compounds, including Fc, were 1 mM, the current intensities of the CVs of **Ir-D1** and **Ir-D2** for the  $R_{l-2,i}$  processes appeared to be lower than those of the mononuclear counterparts by a factor of 1.8. This is in line with the square root of the ratio of the diffusion coefficients of Fc ( $1.13 \times 10^{-5} \text{ cm}^2 \text{ s}^{-1}$  in DMF/0.1 M TBAP)<sup>[S6]</sup> and the investigated mononuclear (**Ir-M1** and **Ir-M2**) and binuclear (**Ir-D1** and **Ir-D2**) complexes, which we estimated to be *ca.*  $9 \times 10^{-6}$  and  $3 \times 10^{-6} \text{ cm}^2 \text{ s}^{-1}$ , respectively, by the CV of the  $R_{l,i}$  processes knowing the area of the electrode.<sup>[46]</sup> Whereas the behavior of  $O_{l,i}$  processes for **Ir-D1** and **Ir-D2** is more complicated as it involves the simultaneous oxidation of two Ir metal centers. For such a process, a bielectronic wave is expected for two identical non-interacting moieties connected by a bridge, which should lead to a distinctive peak-to-peak separation of 29 mV and a current intensity that almost double that of the monoelectronic counterpart. However, although the oxidation process is indeed bielectronic, it is not possible to observe the features described above, because the two metal centers interact (although poorly) with each other. This is a well-known behavior, described in literature, which involves thermodynamic and statistical effects.<sup>[S5,S6]</sup> Moreover, to these effects, one should also take into account the square root of the diffusion coefficient ratio and the fact that a proper compensation of the ohmic drop could not be attained.

### *Computational details*

All calculations were made using the ADF-2019 code at the density functional theory with B3LYP functional (DFT).<sup>[S7]</sup> All atoms were described with the TZP basis-set. Scalar relativistic were introduced through the zero-order relativistic approximation (ZORA) Hamiltonian.<sup>[S8-S10]</sup> All calculations were made with a non-explicit dichloromethane solvent within the Conductor-like-screening model (COSMO).<sup>[S11]</sup> Weak interactions were introduced through Grimme D3 corrections.<sup>[S12]</sup> The structures of complexes **Ir-M1**, **Ir-M2**, **Ir-D1** and **Ir-D2** were fully optimized and the absorption spectra computed through time dependent DFT (TD-DFT) using the Tamm-Dancoff approximation (TDA).<sup>[S13]</sup> 40 roots were computed for the mononuclear complexes and 25 roots for the binuclear counterparts. Spin-orbit coupling corrections were introduced by perturbation of the computed spectra. Emission properties were determined after the optimization of excited states geometries through the TD-DFT approach, in the same conditions. The nature of the excited states has been analyzed with TheoDORE software.<sup>[S14]</sup> The electron density differences were computed using the dgrid package and visualized using ChimeraX software.<sup>[S15]</sup>

Averaged radiative rate constant values,  $k_{r,ave}$ , were estimated by using the following equation (eqn. 6)

$$k_{r,ave} = \frac{k_r^{T1,I} + k_r^{T1,II} e^{-\frac{\Delta E_{I,II}}{RT}} + k_r^{T1,III} e^{-\frac{\Delta E_{I,III}}{RT}}}{1 + e^{-\frac{\Delta E_{I,II}}{RT}} + e^{-\frac{\Delta E_{I,III}}{RT}}} \quad (\text{eqn.6})$$

where  $k_r^{T1,I}$ ,  $k_r^{T1,II}$  and  $k_r^{T1,III}$  are the radiative rate constants computed for the  $T_1$  sublevel ( $T_{1,I}$ ,  $T_{1,II}$ ,  $T_{1,III}$ ), respectively, R is the ideal gas constant and T is the absolute temperature (T = 293 K).

### ***LEC device fabrication and characterization***

For device fabrication, standard clean and UV/ozone treatment were performed on the indium-tin oxide (ITO) coated glass substrates. After cleaning, the substrates were spin-coated with a

poly(3,4-ethylenedioxythiophene):poly(styrene sulfonate) (PEDOT:PSS) layer (40 nm) at 3500 rpm and they were then baked at 150 °C for 30 min in ambient air. The mixture of complex (**Ir-M1**, **Ir-M2**, **Ir-D1** and **Ir-D2**) (80 wt.%) and 1-butyl-3-methylimidazolium hexafluorophosphate [BMIMPF<sub>6</sub>] (20 wt.%) in acetonitrile solution was spun on top of the PEDOT:PSS layer. The ionic liquid [BMIMPF<sub>6</sub>] was added to provide additional mobile ions to accelerate the device response. Various solution concentrations (40, 60, 80, or 100 mg mL<sup>-1</sup>) were utilized in spin coating to deposit different emissive-layer thicknesses for device performance optimization. Spin coating of all emissive layers was performed at 2000 rpm in ambient air. The thicknesses of the emissive layers were measured by ellipsometry. After depositing the emissive layers, the samples were baked at 60 °C for 8 hours in a vacuum oven to remove the residual solvent. Finally, a silver top contact was deposited by thermal evaporation in a vacuum chamber (*ca.* 10<sup>-6</sup> torr). The EL emission properties of these LECs were measured using source-measurement units (B2901A, Keysight) and a calibrated Si photodiode. The EL spectra of these LECs were acquired with a calibrated fiber-optic spectrometer (USB2000, Ocean Optics). All LEC devices were measured under constant bias voltages. Device measurements were performed in a nitrogen glove box to reduce the device degradation rate.

#### *X-ray crystallographic analysis*

The crystals were placed in oil, and a single crystal was selected, mounted on a glass fibre and placed in a low-temperature N<sub>2</sub> stream. X-ray diffraction data collection was carried out on a Bruker APEX II DUO Kappa-CCD diffractometer equipped with an Oxford Cryosystem liquid N<sub>2</sub> device, using Mo-K $\alpha$  radiation ( $\lambda = 0.71073 \text{ \AA}$ ). The crystal-detector distance was 38mm. The cell parameters were determined (APEX3 software)<sup>[S16]</sup> from reflections taken from three sets of 6 frames, each at 10 s exposure. The structure was solved using the program SHELXT-2014.<sup>[S17]</sup>The refinement and all further calculations were carried out using SHELXL-2018.<sup>[S18]</sup>

The H-atoms were included in calculated positions and treated as riding atoms using SHELXL default parameters. The non-H atoms were refined anisotropically, using weighted full-matrix least-squares on  $F^2$ . A semi-empirical absorption correction was applied using SADABS in APEX3.<sup>[S19]</sup> The SQUEEZE instruction in PLATON<sup>[S20]</sup> was applied. The residual electron density was assigned to 0.5 molecule of the dichloromethane solvent for compounds **IrM1** and **IrM2**. For this latter the PF<sub>6</sub> anion is disordered over two positions and the atoms C20 C21 and C22 are disordered over two positions.

For compounds **Ir-D2**, X-ray diffraction data collection was carried out on a Bruker PHOTON III DUO CPAD diffractometer equipped with an Oxford Cryosystem liquid N<sub>2</sub> device, using Mo-K $\alpha$  radiation ( $\lambda = 0.71073 \text{ \AA}$ ). The crystal-detector distance was 38mm. The cell parameters were determined (APEX3 software)<sup>[S16]</sup> from reflections taken from 1 set of 180 frames at 1s exposure. The structure was solved using the program SHELXT-2018.<sup>[S17]</sup> The refinement and all further calculations were carried out using SHELXL-2018.<sup>[S18]</sup> The H-atoms were included in calculated positions and treated as riding atoms using SHELXL default parameters. The non-H atoms were refined anisotropically, using weighted full-matrix least-squares on  $F^2$ . A semi-empirical absorption correction was applied using SADABS in APEX3.<sup>[S19]</sup> The SQUEEZE instruction in PLATON<sup>[S20]</sup> was applied. The residual electron density was assigned to 0.75 molecule of the dichloromethane solvent, for compounds **Ir-D2**. For compounds **Ir-D1**, The atoms C15 is disordered over two positions.

CCDC 2338499–2338502 contains the supplementary crystallographic data for this paper. These data can be obtained free of charge from The Cambridge Crystallographic Data Centre via [www.ccdc.cam.ac.uk/data\\_request/cif](http://www.ccdc.cam.ac.uk/data_request/cif).

### ***Thermal analysis***

Thermogravimetric analyses were carried out on a Q50 systems from TA Instruments under air with a thermal scanning rate of 5°C min<sup>-1</sup>.

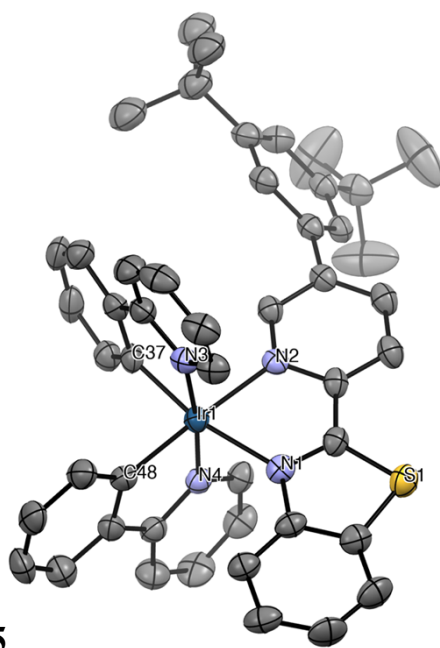

**Figure S1.** ORTEP diagram of compound **Ir-M1** with thermal ellipsoids shown at 50% probability level obtained by single-crystal X-ray diffractometric analysis. Hydrogen atoms,  $\text{PF}_6^-$  counter-anion and solvent molecules are omitted for clarity.

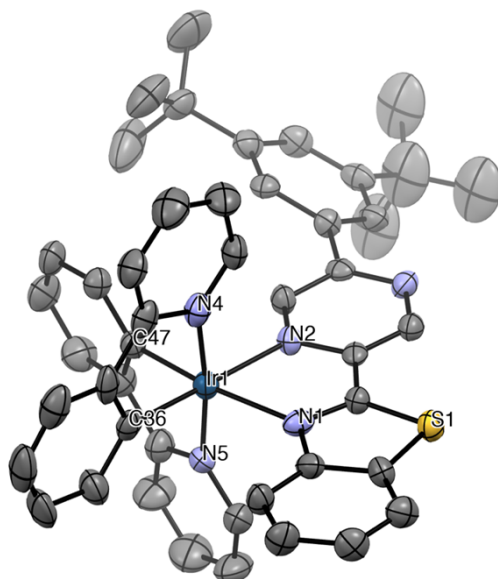

**Figure S2.** ORTEP diagram of compound **Ir-M2** with thermal ellipsoids shown at 50% probability level obtained by single-crystal X-ray diffractometric analysis. Hydrogen atoms,  $\text{PF}_6^-$  counter-anion and solvent molecules are omitted for clarity.

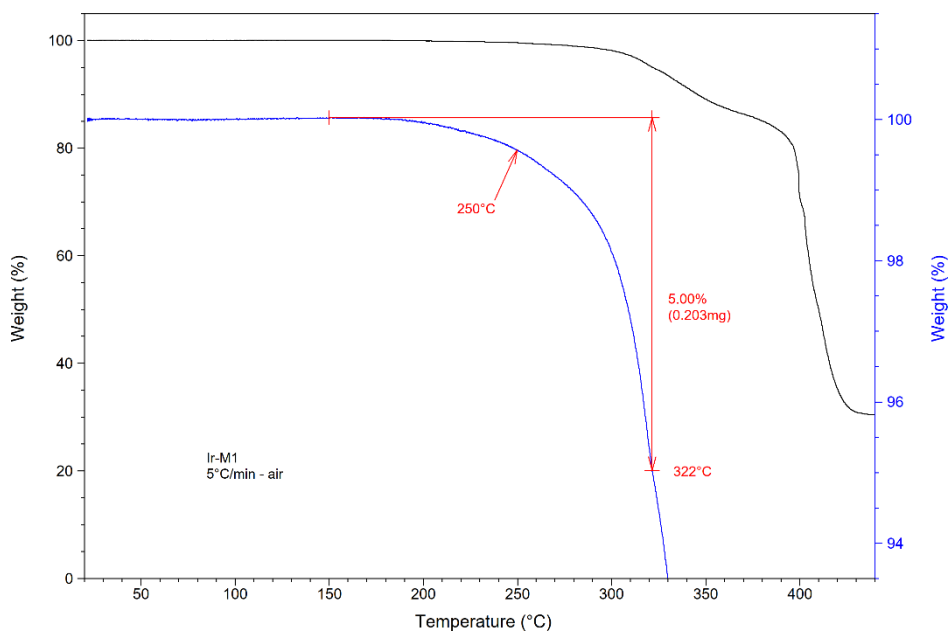

**Figure S3.** Thermogravimetric analysis (TGA) curve recorded for compound **Ir-M1** at heating rate of  $5^{\circ}\text{C min}^{-1}$  under air.

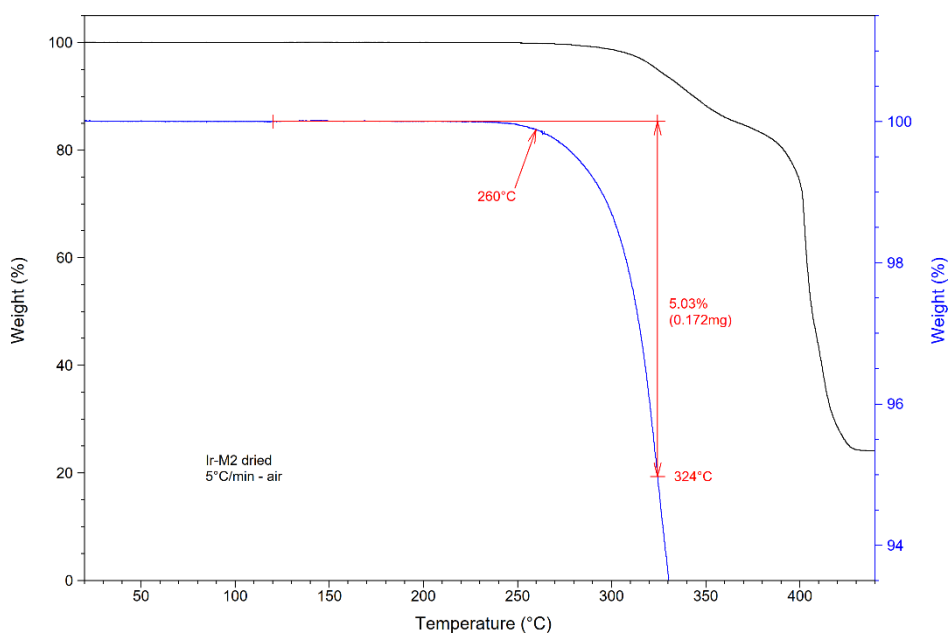

**Figure S4.** Thermogravimetric analysis (TGA) curve recorded for compound **Ir-M2** at heating rate of  $5^{\circ}\text{C min}^{-1}$  under air.

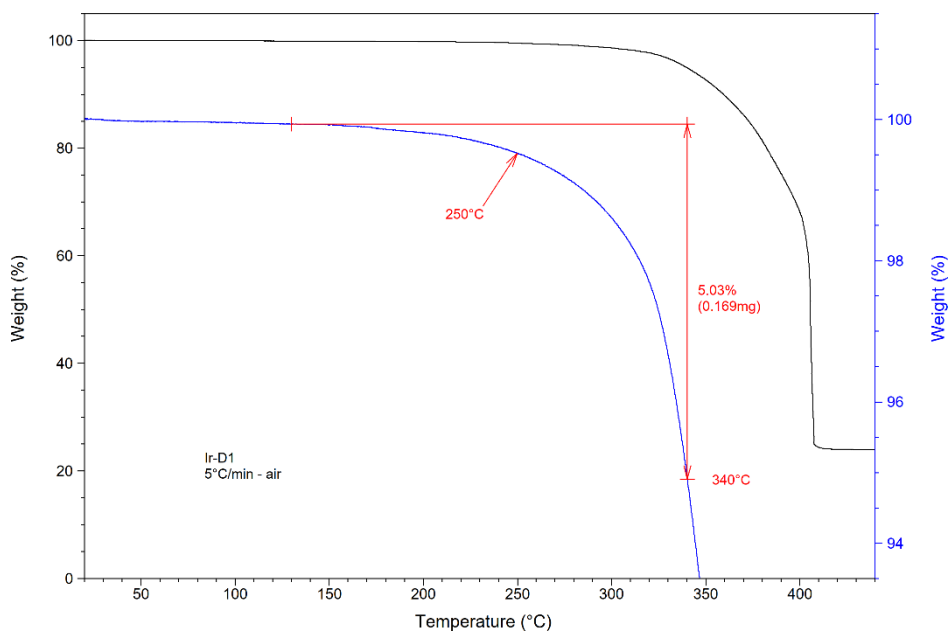

**Figure S5.** Thermogravimetric analysis (TGA) curve recorded for compound **Ir-D1** at heating rate of  $5^{\circ}\text{C min}^{-1}$  under air.

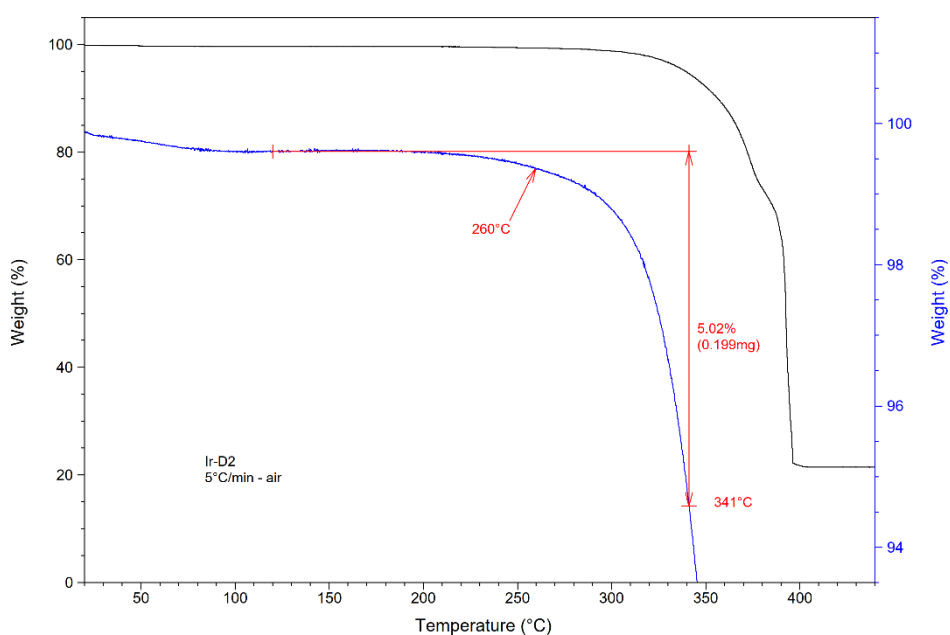

**Figure S6.** Thermogravimetric analysis (TGA) curve recorded for compound **Ir-Ds** at heating rate of  $5^{\circ}\text{C min}^{-1}$  under air.



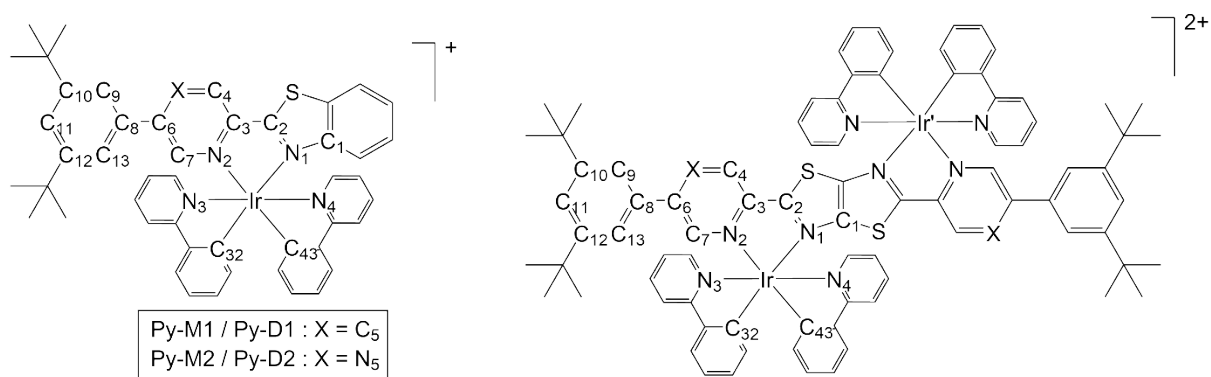

**Figure S7.** Atom labelling employed for the mononuclear (*left*) and dinuclear (*right*) complexes.

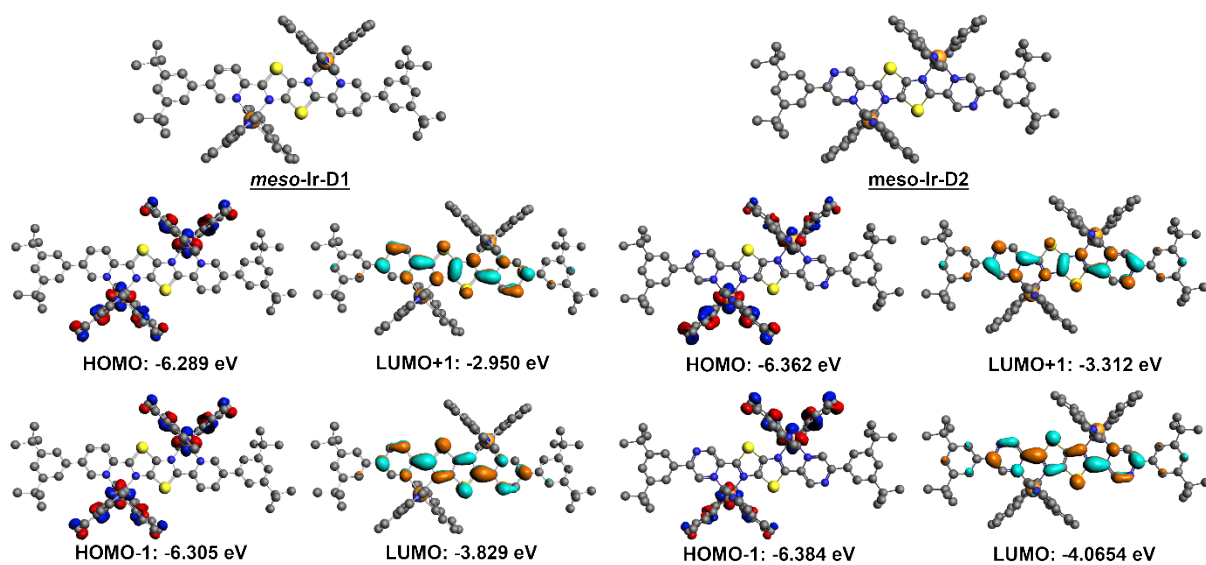

**Figure S8.** Frontier orbitals of *meso-Ir-D1* and *meso-Ir-D2*. Ir atoms are orange, S atoms are yellow, N atoms are blue and C atoms are grey. H atoms were eluded for visibility.

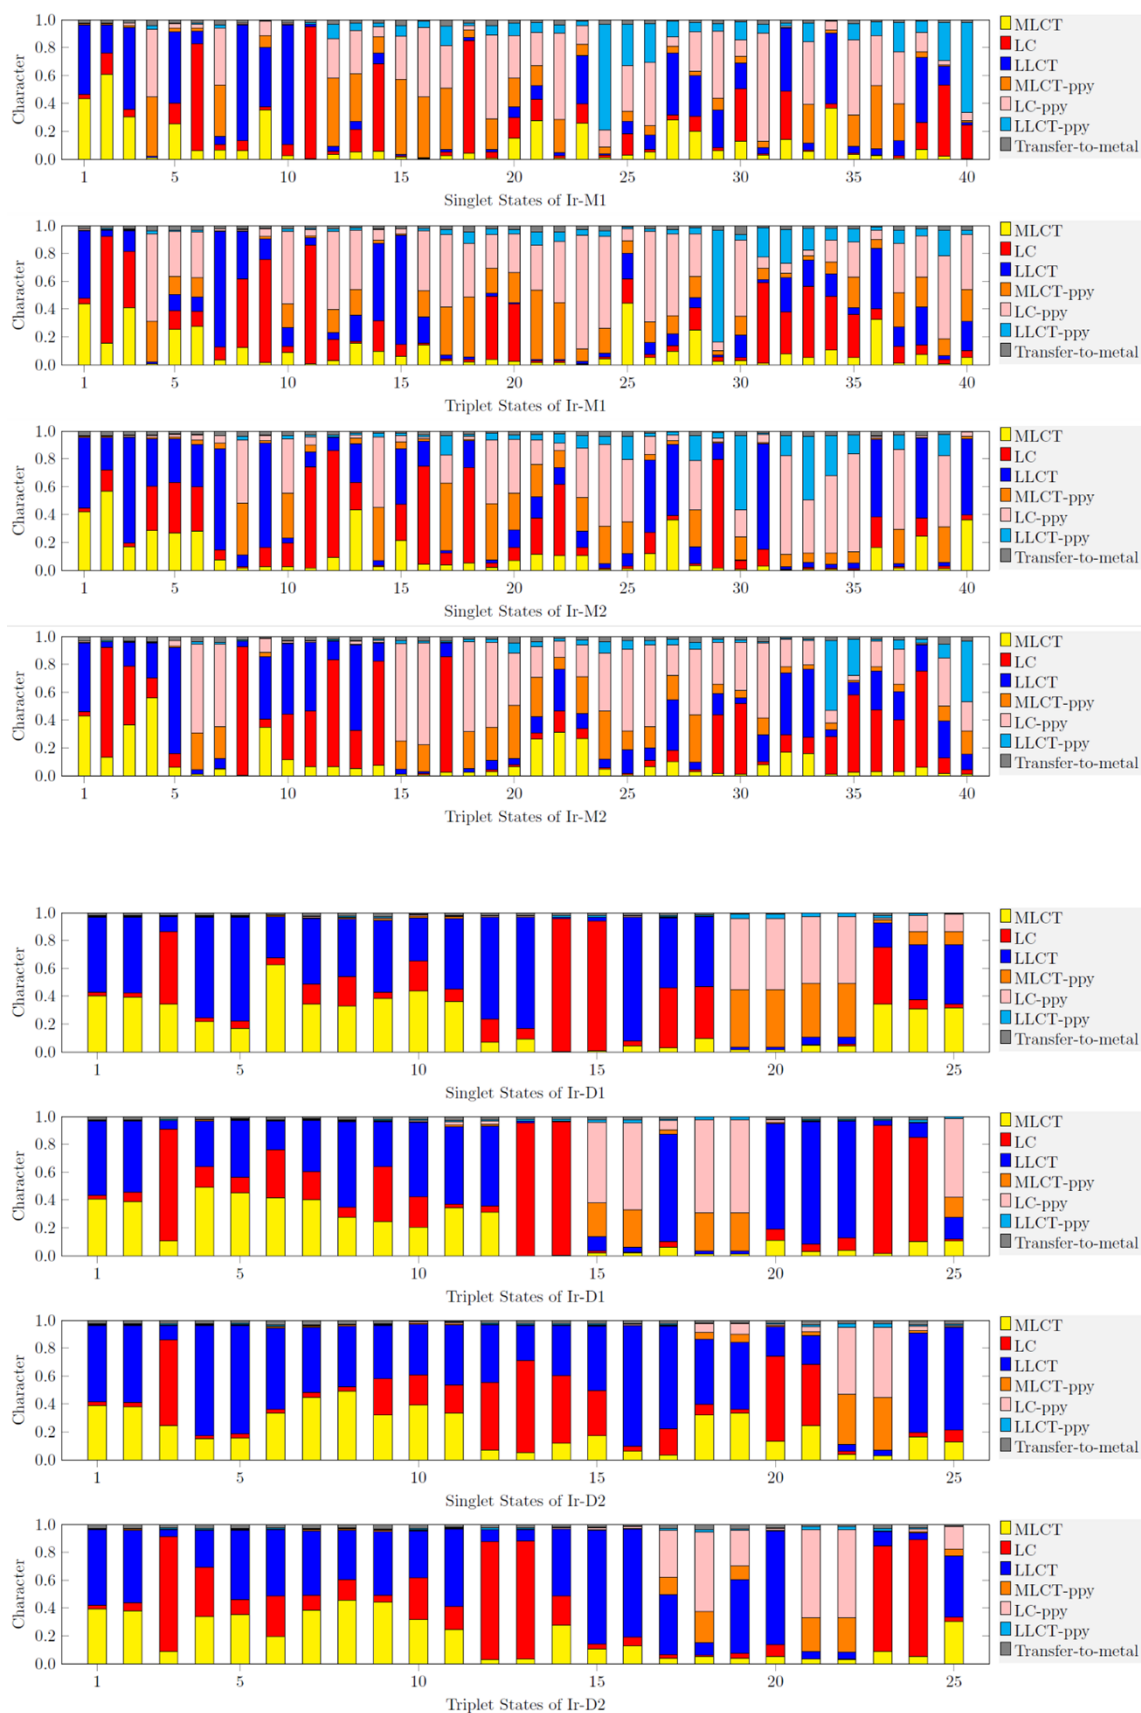

**Figure S9.** TheoDORÉ analysis of the singlet and triplet excited states computed for mononuclear **Ir-M1** and **Ir-M2** and binuclear **Ir-D1** and **Ir-D2** derivatives.

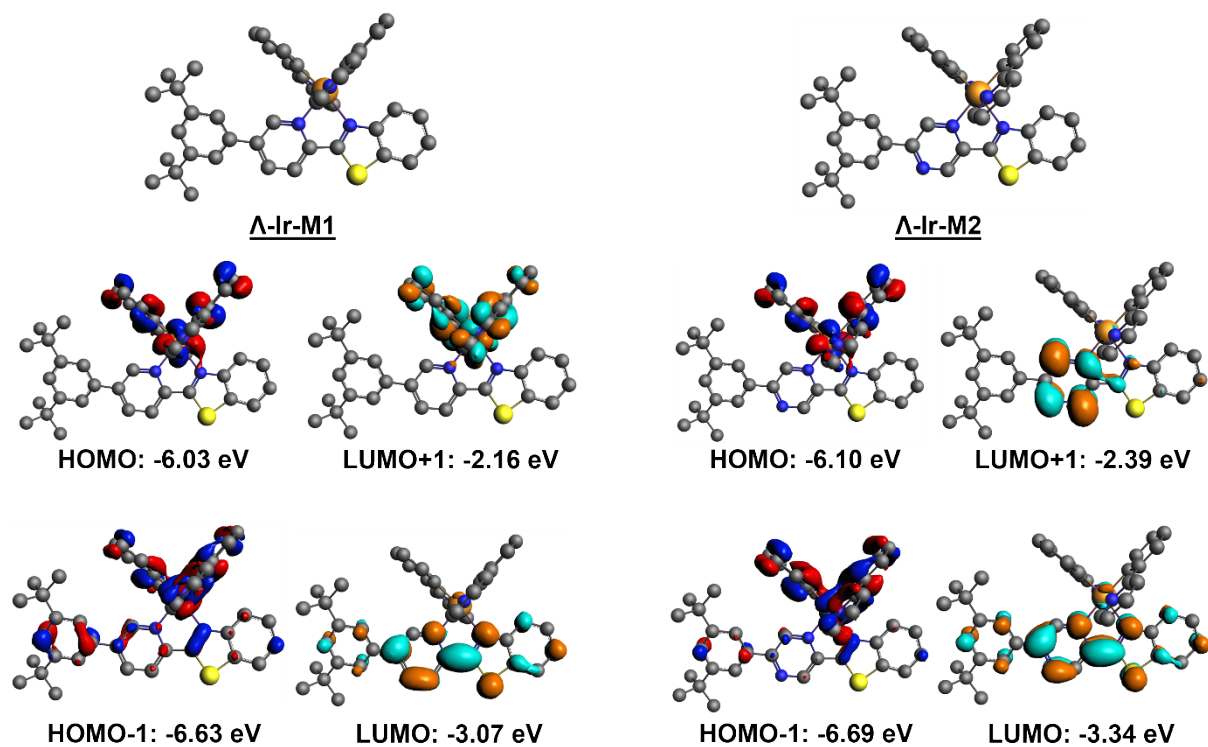

**Figure S10.** Frontier orbitals of  $\Delta$ -Ir-M1 and  $\Delta$ -Ir-M2. Ir atoms are orange, S atoms are yellow, N atoms are blue and C atoms are grey. H atoms were eluded for visibility.

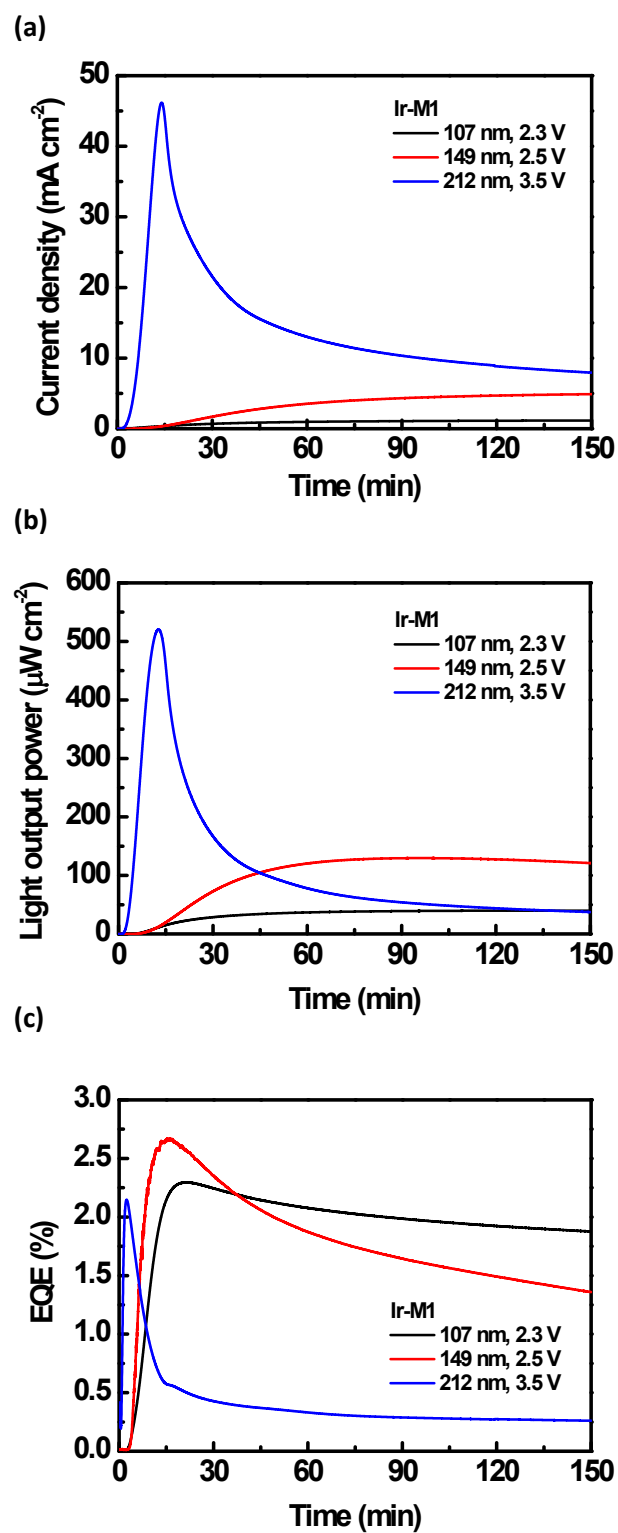

**Figure S11.** Time-dependent (a) current density, (b) light output, and (c) EQE of the LECs based on complex **Ir-M1**.

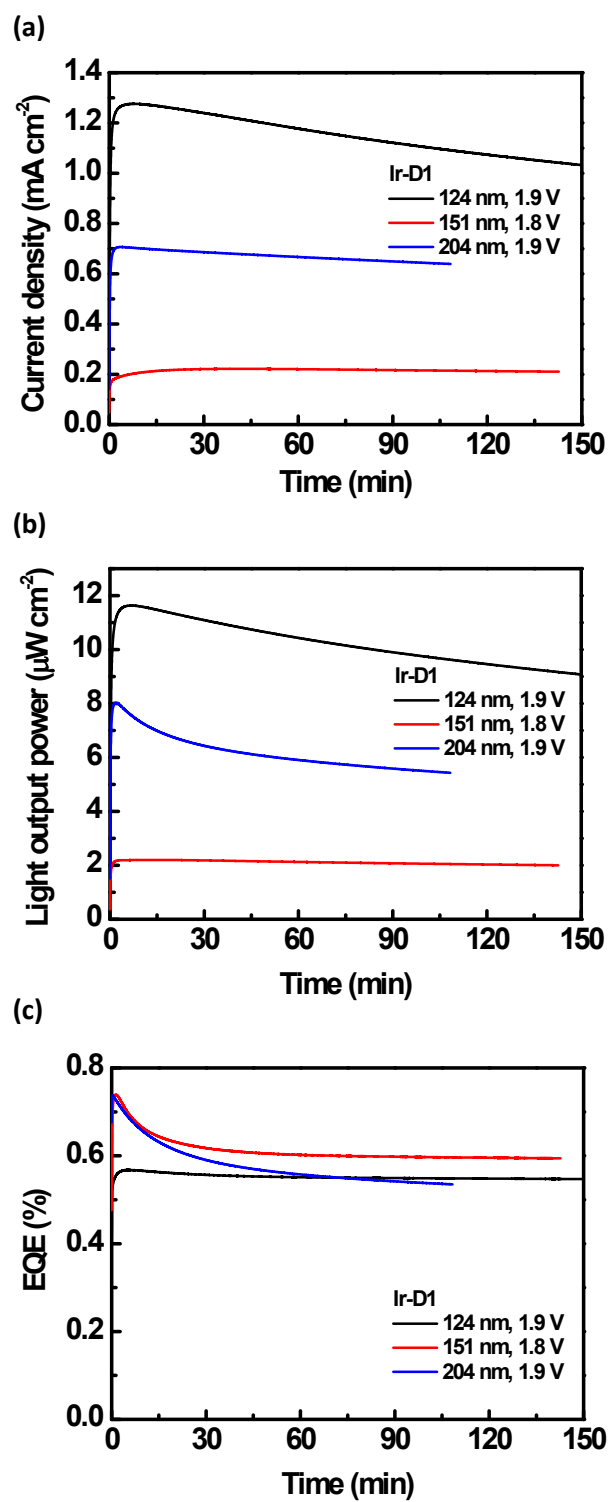

**Figure S12.** Time-dependent (a) current density, (b) light output, and (c) EQE of the LECs based on complex Ir-D1.

## Chemical characterization

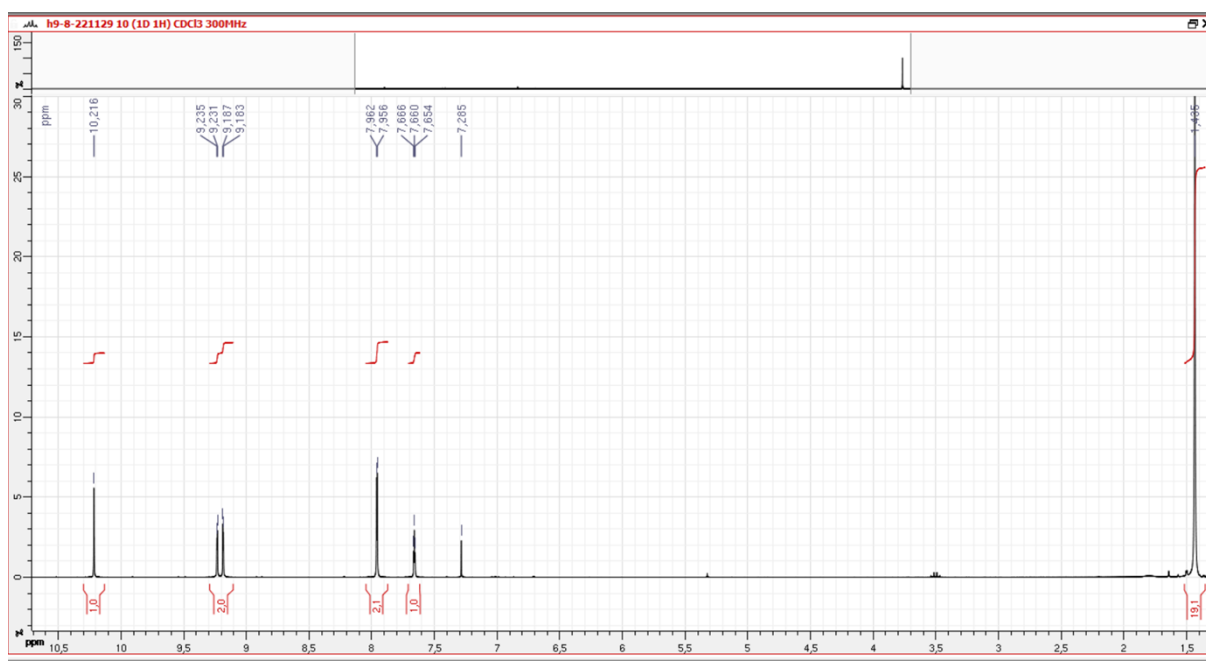

**Figure S13.** <sup>1</sup>H NMR (500 MHz, CDCl<sub>3</sub>, 298 K) spectrum recorded for compound 5-(3,5-di-*tert*-butylphenyl)pyrazine-2-carbaldehyde.

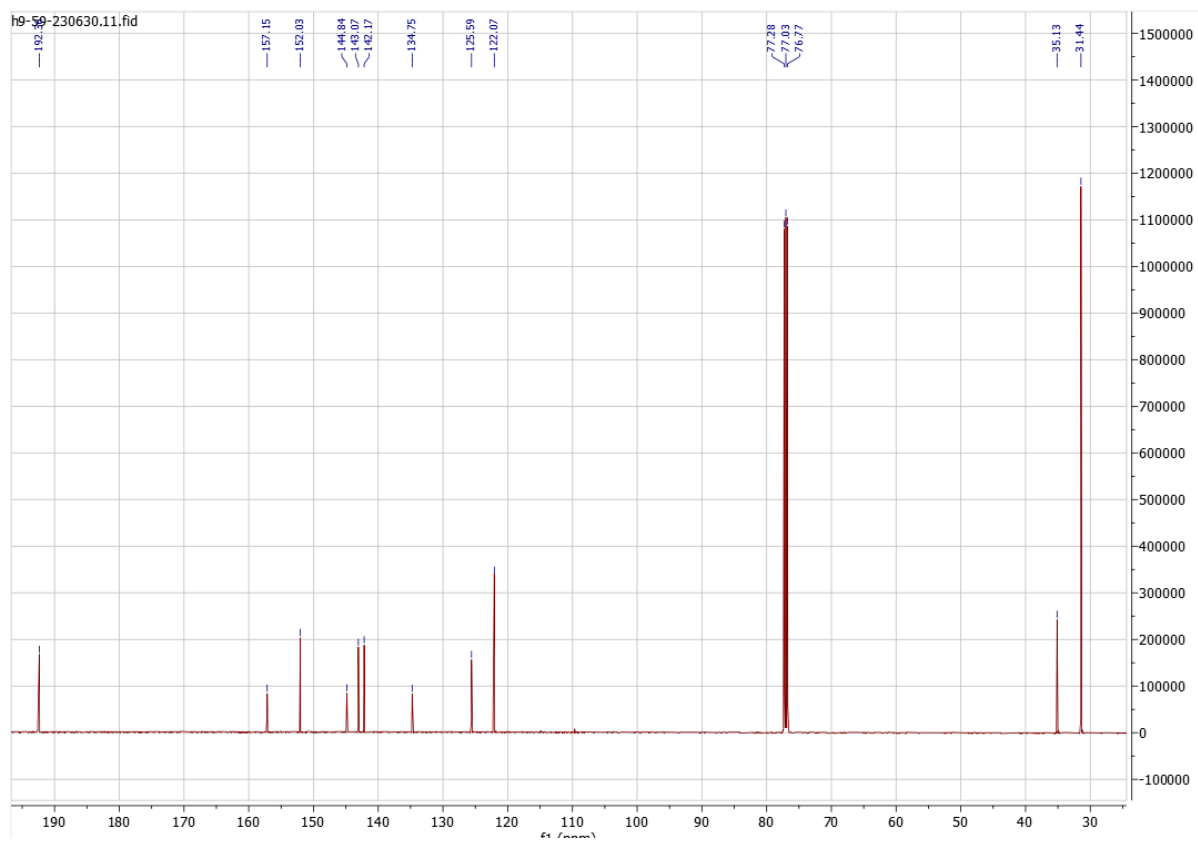

**Figure S14.**  $^{13}\text{C}\{^1\text{H}\}$  NMR (125 MHz,  $\text{CDCl}_3$ , 298 K) spectrum recorded for compound 5-(3,5-di-*tert*-butylphenyl)pyrazine-2-carbaldehyde.

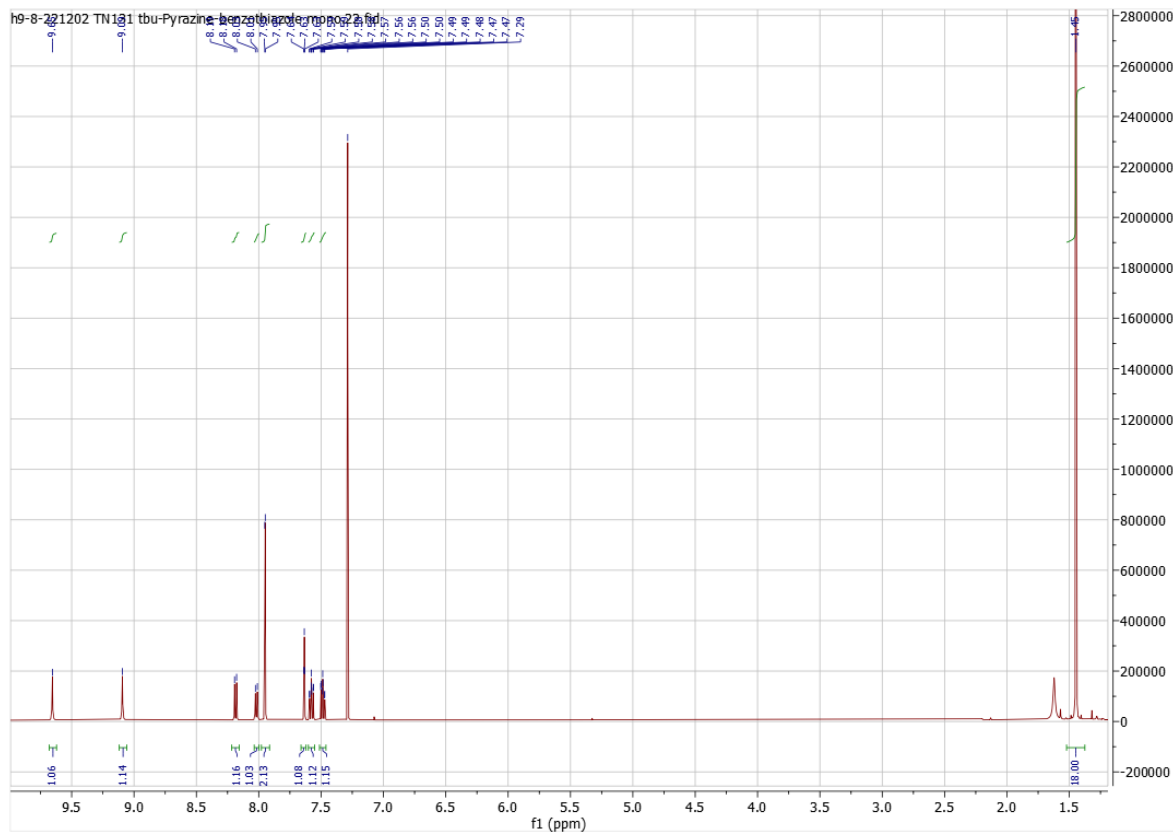

**Figure S15.**  $^1\text{H}$  NMR (500 MHz,  $\text{CDCl}_3$ , 298 K) spectrum recorded for ligand **L2**.

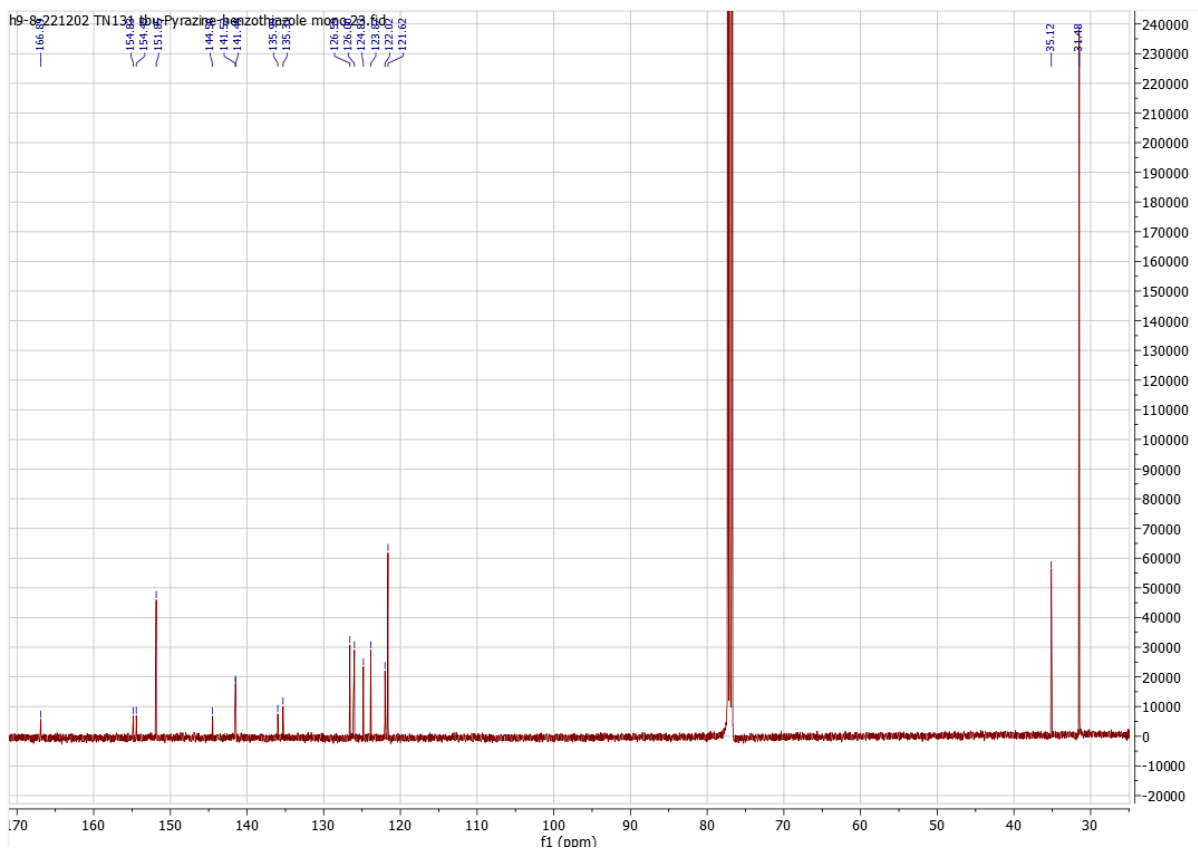

**Figure S16.**  $^{13}\text{C}\{^1\text{H}\}$  NMR (125 MHz,  $\text{CDCl}_3$ , 298 K) spectrum recorded for ligand **L2**.

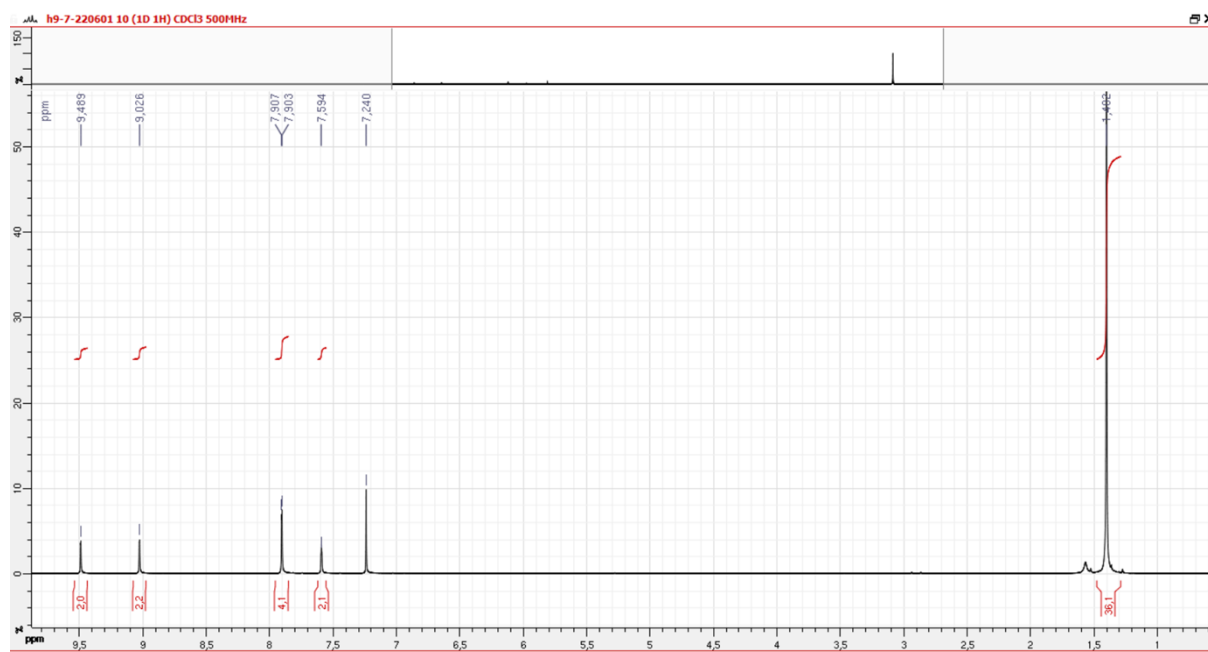

**Figure S17.**  $^1\text{H}$  NMR (500 MHz,  $\text{CDCl}_3$ , 298 K) spectrum recorded for ligand **L4**.



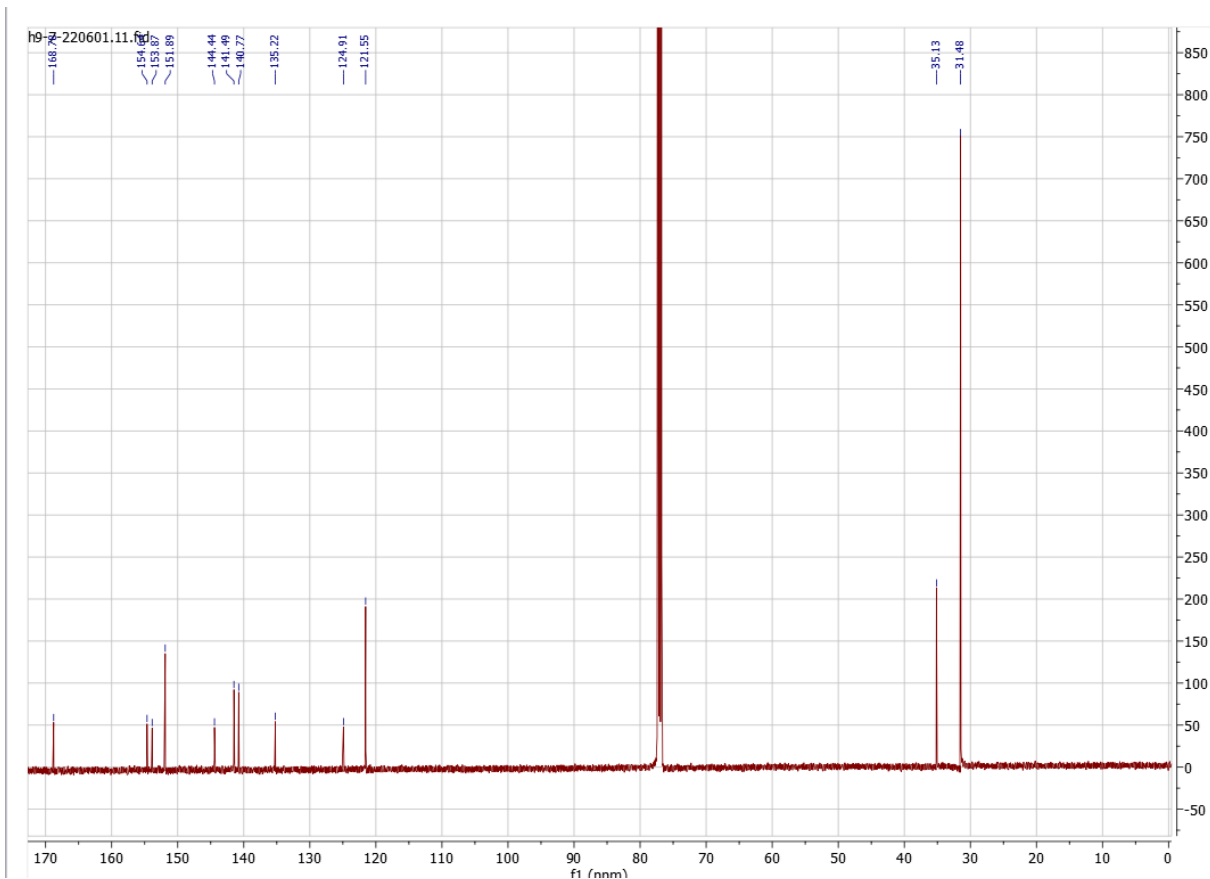

Figure S18.  $^{13}\text{C}\{^1\text{H}\}$  NMR (125 MHz,  $\text{CDCl}_3$ , 298 K) spectrum recorded for ligand L4.

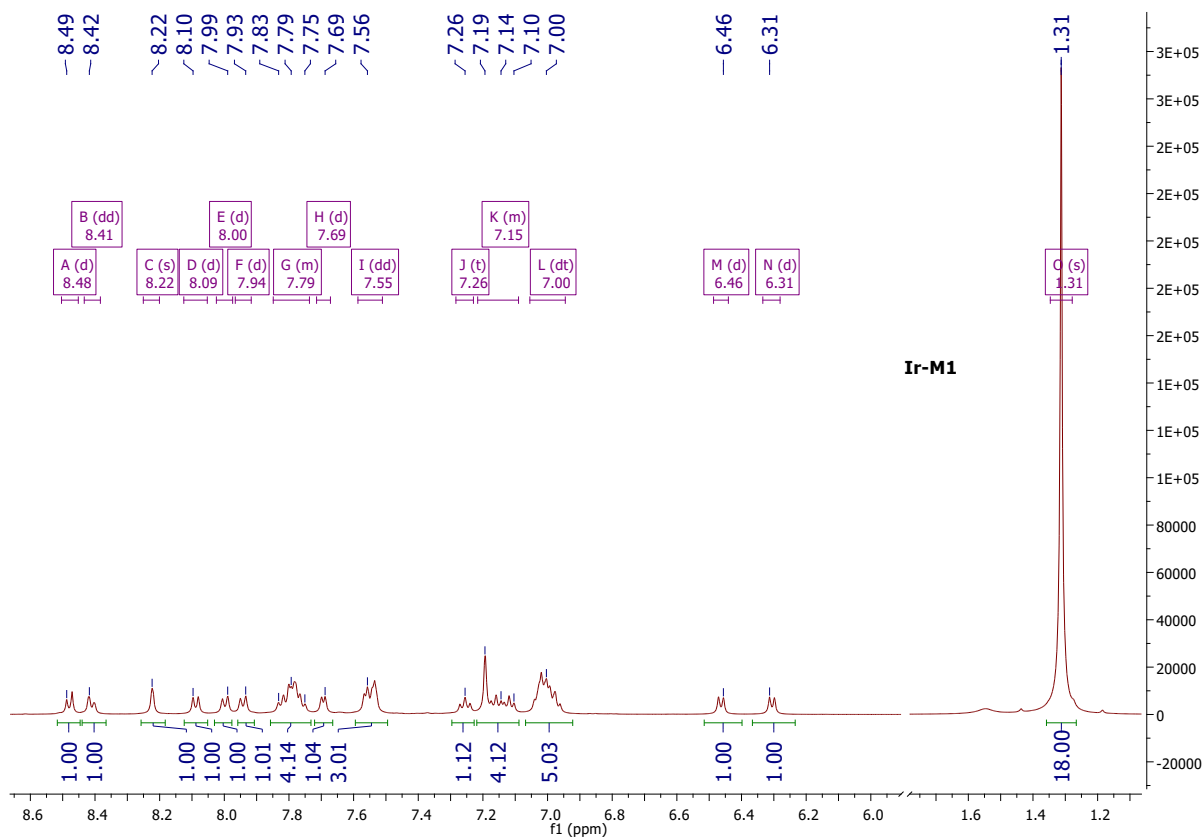

**Figure S19.**  $^1\text{H}$  NMR (500 MHz,  $\text{CD}_2\text{Cl}_2$ , 298 K) spectrum recorded for complex **Ir-M1**.

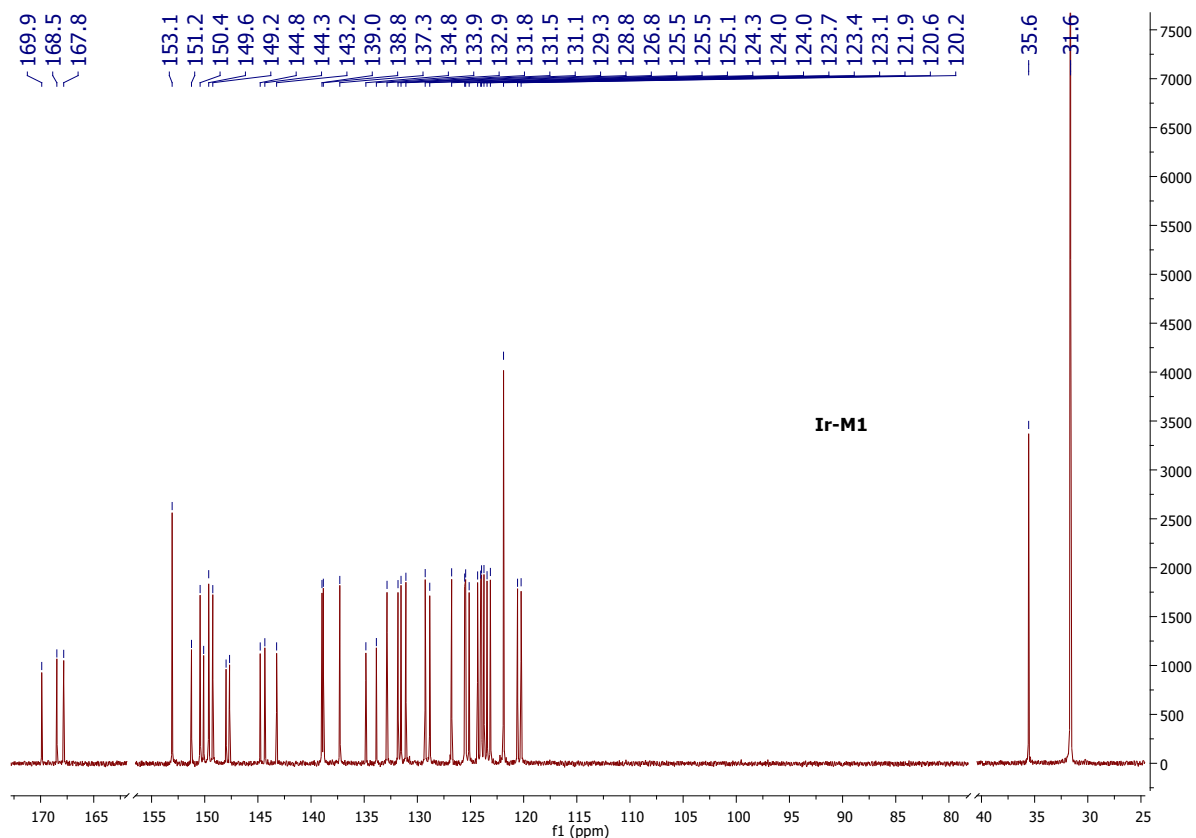

**Figure S20.**  $^{13}\text{C}\{^1\text{H}\}$  NMR (126 MHz,  $\text{CD}_2\text{Cl}_2$ , 298 K) spectrum recorded for complex **Ir-M1**.

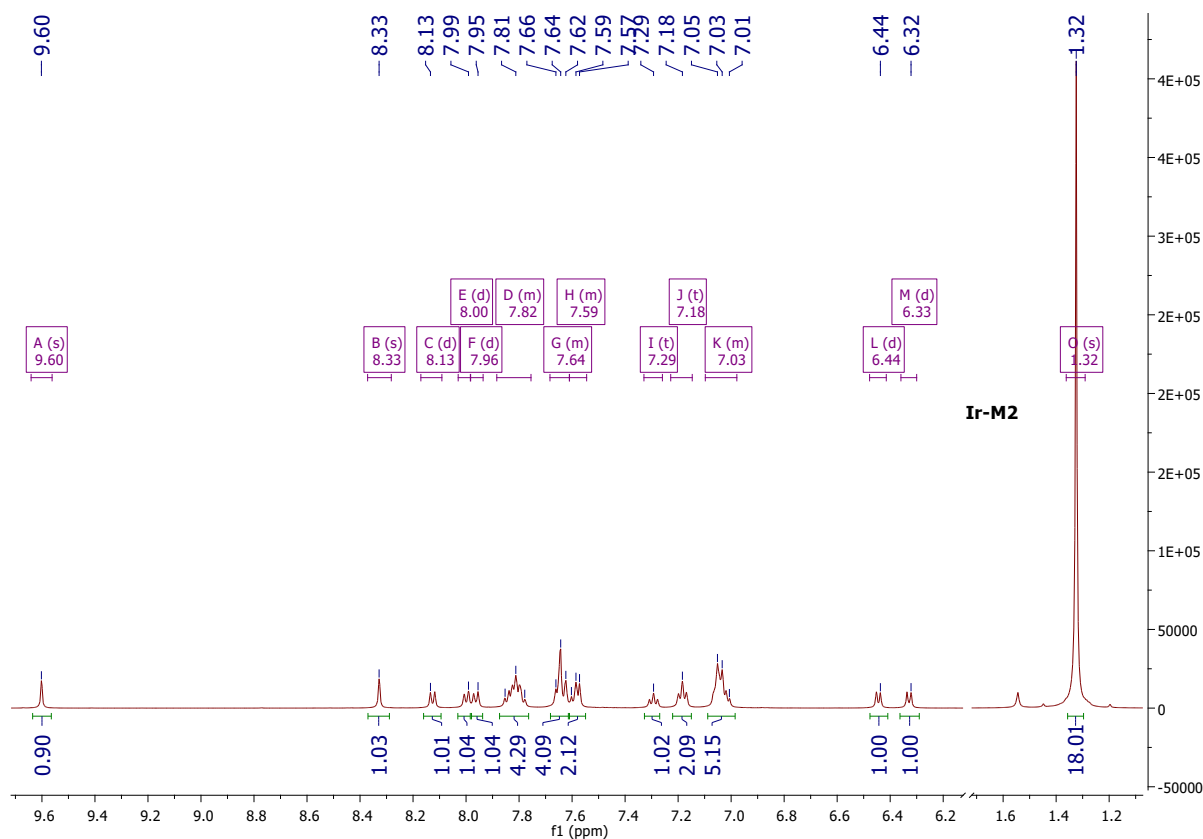

**Figure S21.**  $^1\text{H}$  NMR (500 MHz,  $\text{CD}_2\text{Cl}_2$ , 298 K) spectrum recorded for complex **Ir-M2**.

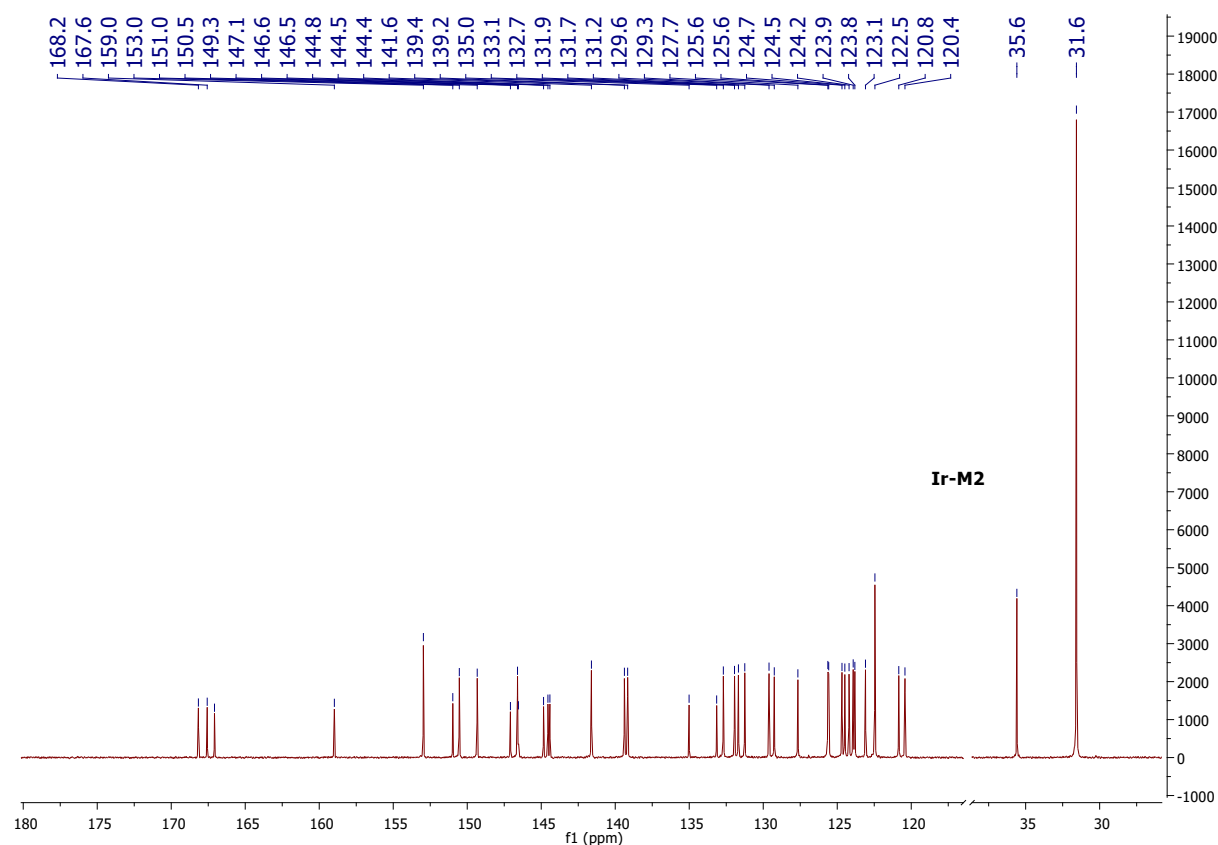

**Figure S22.**  $^{13}\text{C}\{^1\text{H}\}$  NMR (126 MHz,  $\text{CD}_2\text{Cl}_2$ , 298 K) spectrum recorded for complex **Ir-M2**.

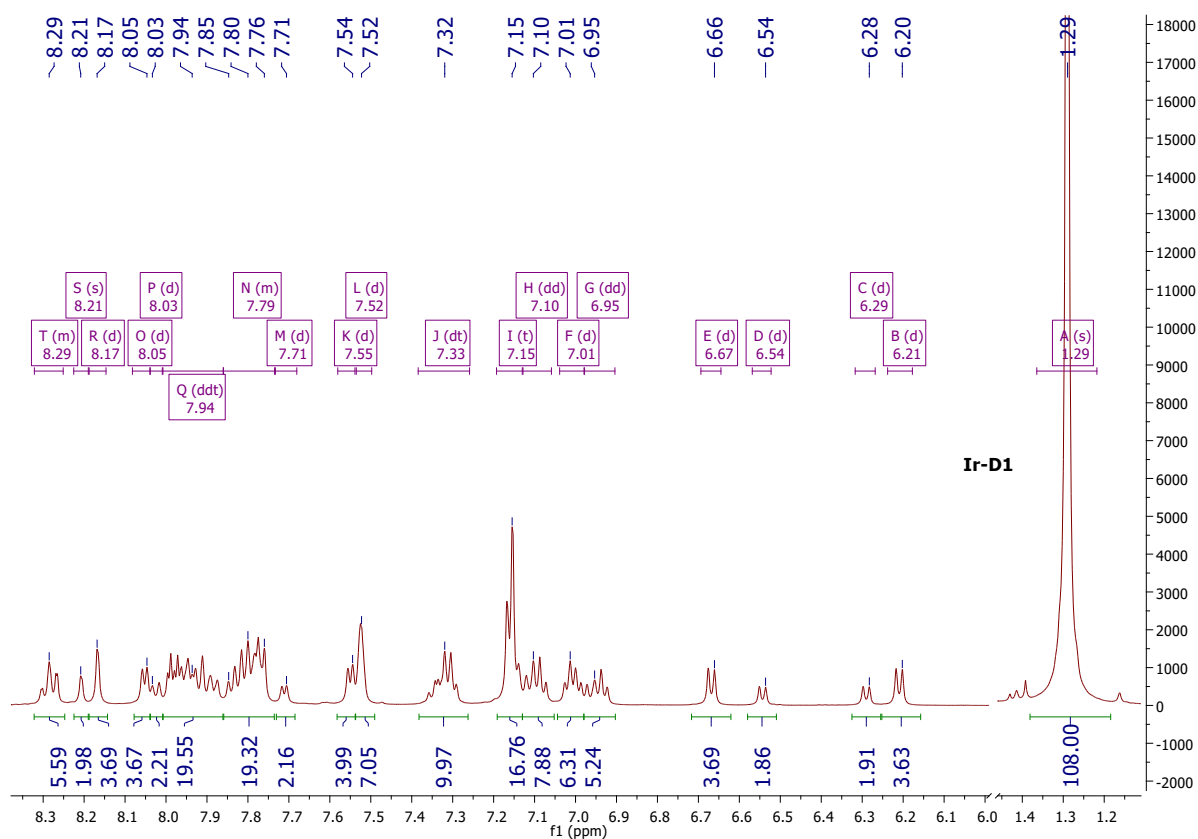

**Figure S23.**  $^1\text{H}$  NMR (500 MHz,  $\text{CD}_2\text{Cl}_2$ , 298 K) spectrum recorded for complex **Ir-D1**.

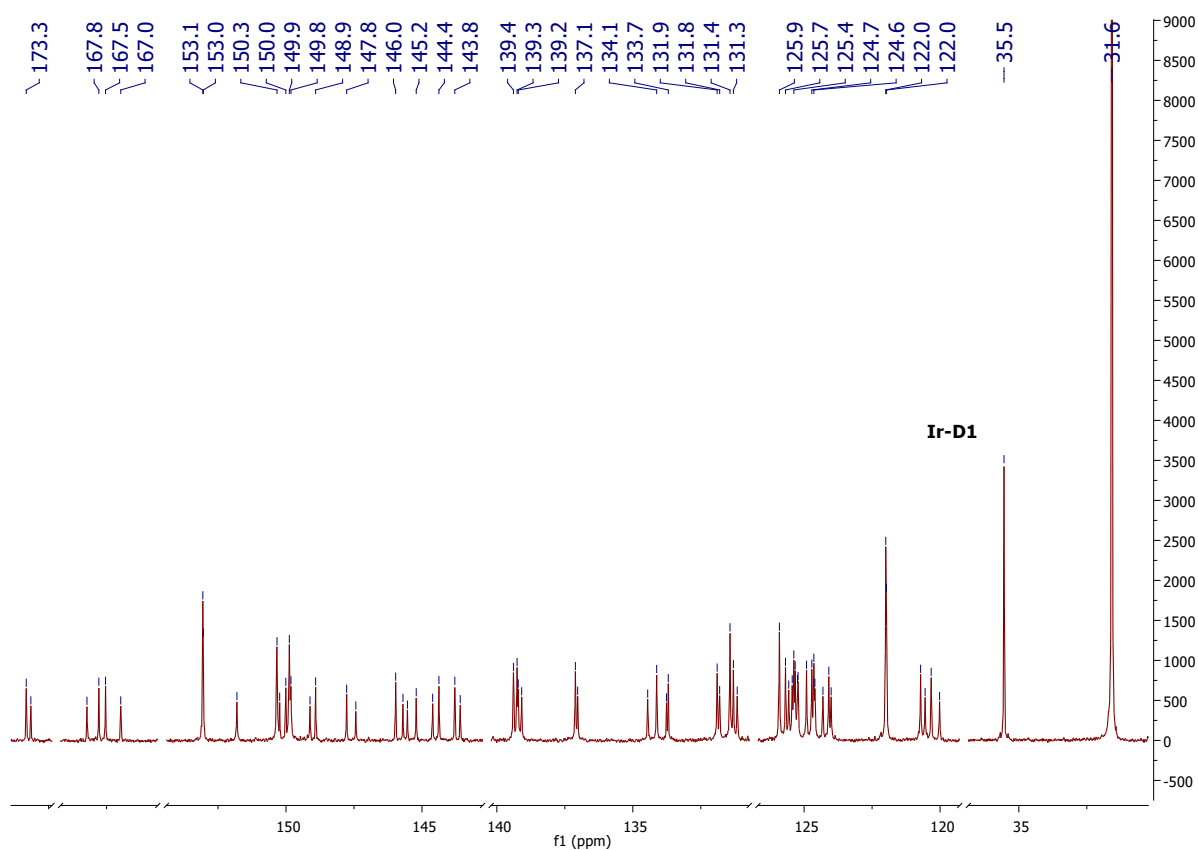

**Figure S24.**  $^{13}\text{C}\{^1\text{H}\}$  NMR (126 MHz,  $\text{CD}_2\text{Cl}_2$ , 298 K) spectrum recorded for complex **Ir-D1**.

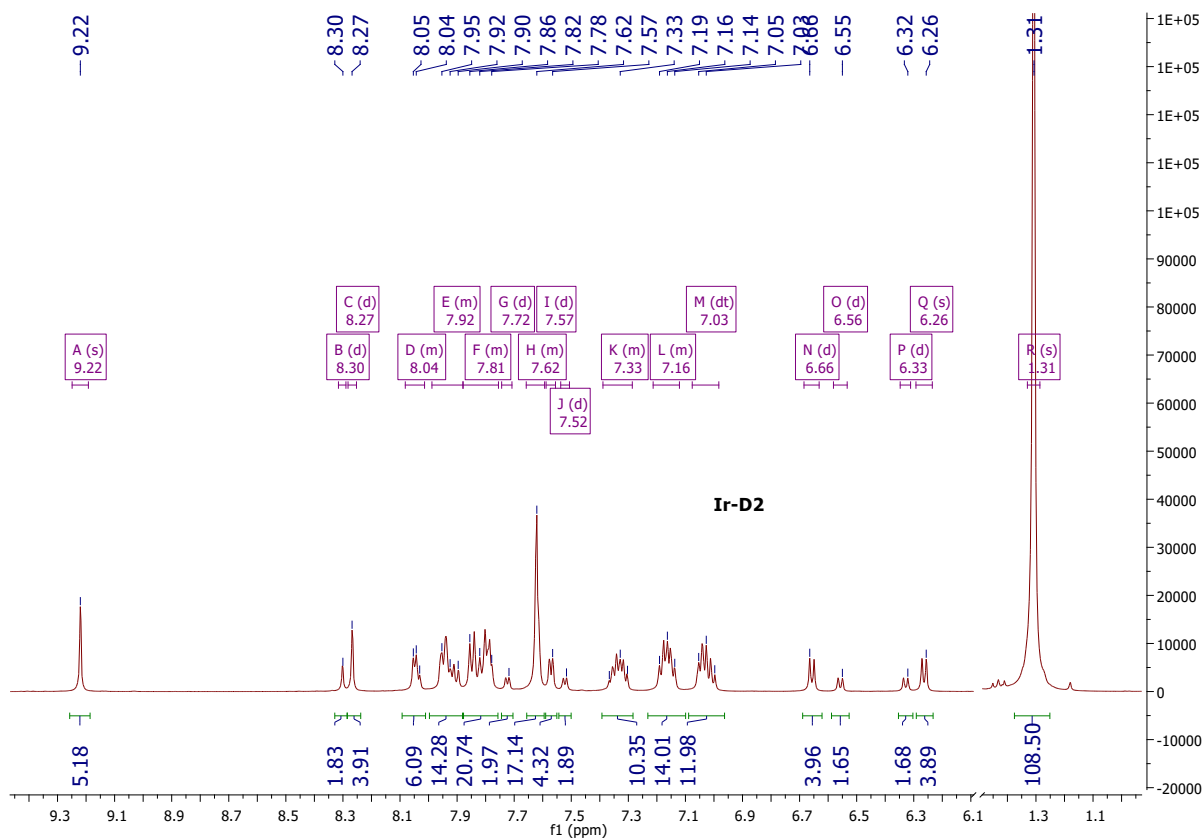

**Figure S25.** <sup>1</sup>H NMR (500 MHz, CD<sub>2</sub>Cl<sub>2</sub>, 298 K) spectrum recorded for complex Ir-D2.

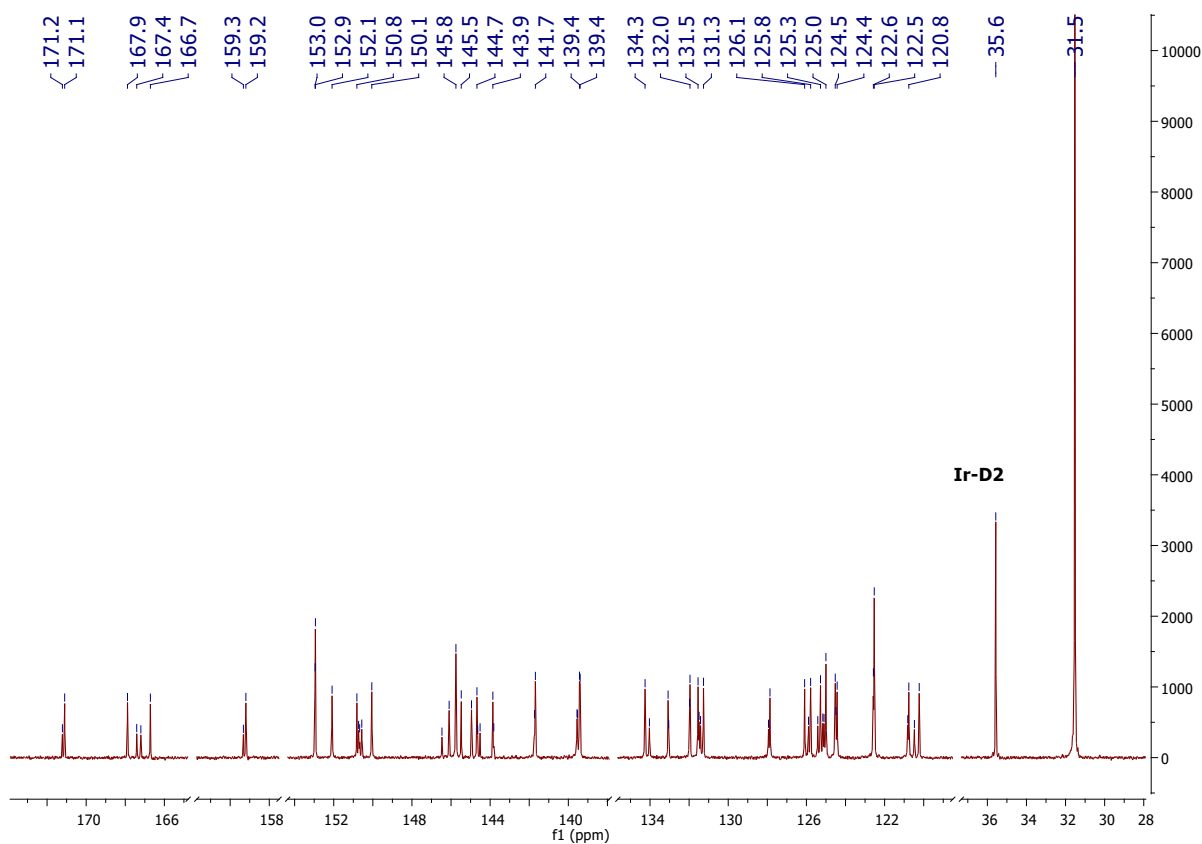

**Figure S26.** <sup>13</sup>C {<sup>1</sup>H} NMR (126 MHz, CD<sub>2</sub>Cl<sub>2</sub>, 298 K) spectrum recorded for complex Ir-D2.

# Mass spectra

Service de Spectrometrie de Masse - Federation de Chimie Le Bel - FR 2010 - CNRS / Unistra

## Analysis Info

Analysis Name F14181SK.d  
 Method Tune\_pos\_Mid.m  
 Sample Name LB39

Acquisition Date 1/20/2023 3:05:44 PM  
 Operator BDAL@DE  
 Instrument micrOTOF II

## Acquisition Parameter

|              |          |            |        |           |           |                    |           |
|--------------|----------|------------|--------|-----------|-----------|--------------------|-----------|
| Source Type  | ESI      | Capillary  | 4500 V | Nebulizer | 0.3 Bar   | Set Hexapole RF    | 330.0 Vpp |
| Ion Polarity | Positive | Dry Heater | 200 °C | Dry Gas   | 3.0 l/min | Set Capillary Exit | 150.0 V   |

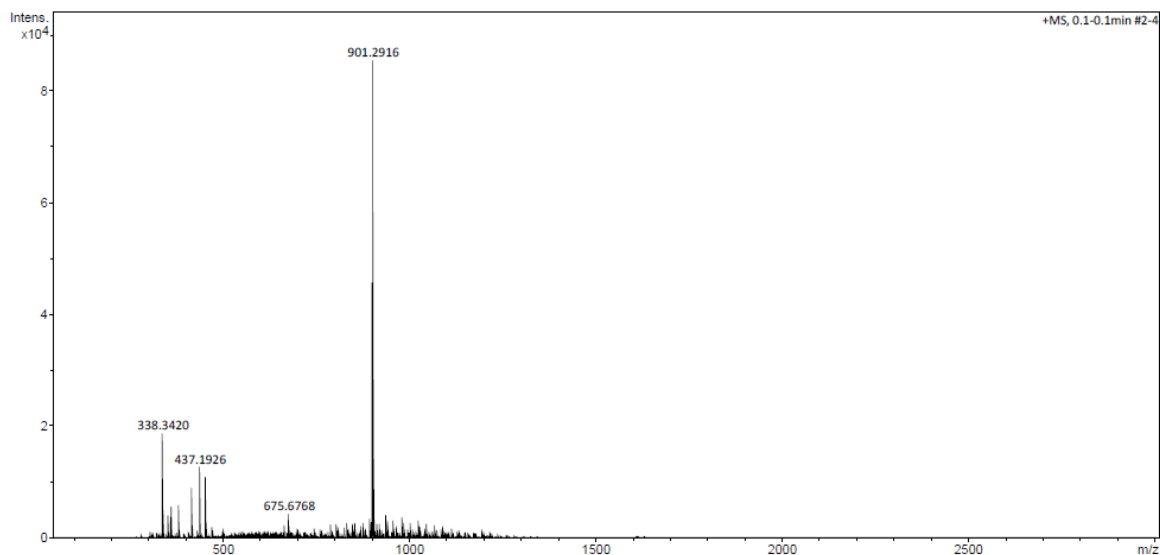

## Mass Spectrum HR Report

### Analysis Info

Analysis Name D:\Data\SMasse\2023\01\_Janvier2023\F14181SK.d  
 Method Tune\_pos\_Mid.m  
 Sample Name LB39  
 Comment

Acquisition Date 1/20/2023 3:05:44 PM  
 Operator BDAL@DE  
 Instrument micrOTOF II  
 8213750.1045  
 1

### Acquisition Parameter

|             |          |              |          |                    |          |
|-------------|----------|--------------|----------|--------------------|----------|
| Source Type | ESI      | Ion Polarity | Positive | Set Corrector Fill | 48.2 V   |
| n/a         | n/a      | n/a          | n/a      | n/a                | n/a      |
| Scan Begin  | 50 m/z   | n/a          | n/a      | Set Reflector      | 1800.0 V |
| Scan End    | 3000 m/z | n/a          | n/a      | Set Flight Tube    | 8600.0 V |
|             |          | n/a          | n/a      | Set Detector TOF   | 2021.6 V |

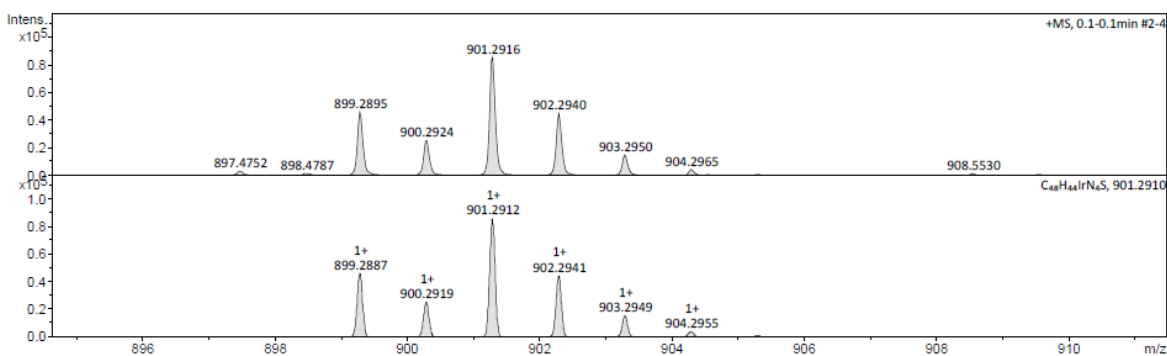

| Meas. m/z # | Ion Formula                                          | m/z err [ppm] | Mean err [ppm] | rdb  | N-Rule | e <sup>-</sup> Conf | mSigma | Std I | Std Mean | m/z  | Std I | VarNorm | Std m/z | Diff | Std Comb | Dev  |
|-------------|------------------------------------------------------|---------------|----------------|------|--------|---------------------|--------|-------|----------|------|-------|---------|---------|------|----------|------|
| 901.291580  | 1 C <sub>48</sub> H <sub>44</sub> IrN <sub>4</sub> S | 901.291046    | -0.4           | -0.5 | 29.5   | ok                  | even   | 2.8   | 2.7      | n.a. | n.a.  | n.a.    | n.a.    | n.a. | n.a.     | n.a. |

Figure S27. High-resolution HR-ESI-MS spectrum of compound Ir-M1.

Analysis Info

|               |                |                  |                      |
|---------------|----------------|------------------|----------------------|
| Analysis Name | F14179SK.d     | Acquisition Date | 1/20/2023 2:56:26 PM |
| Method        | Tune_pos_Mid.m | Operator         | BDAL@DE              |
| Sample Name   | LB40           | Instrument       | micrOTOF II          |

Acquisition Parameter

|              |          |            |        |           |           |                    |           |
|--------------|----------|------------|--------|-----------|-----------|--------------------|-----------|
| Source Type  | ESI      | Capillary  | 4500 V | Nebulizer | 0.3 Bar   | Set Hexapole RF    | 330.0 Vpp |
| Ion Polarity | Positive | Dry Heater | 200 °C | Dry Gas   | 3.0 l/min | Set Capillary Exit | 150.0 V   |

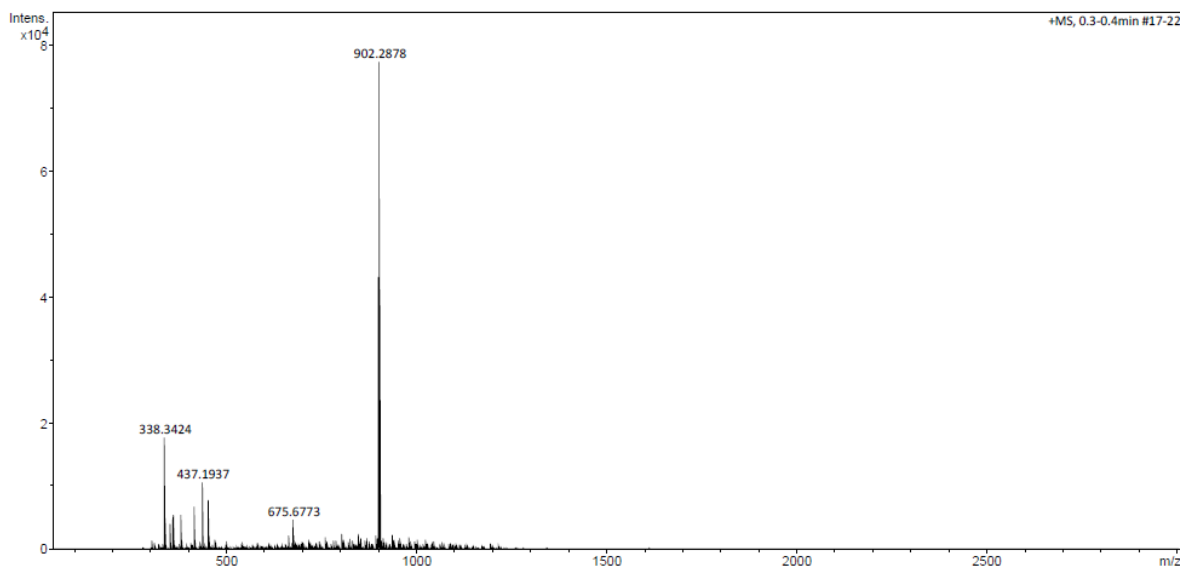

Mass Spectrum HR Report

Analysis Info

|               |                                                |                  |                      |
|---------------|------------------------------------------------|------------------|----------------------|
| Analysis Name | D:\Data\SMasse\2023\01_Janvier 2023\F14179SK.d | Acquisition Date | 1/20/2023 2:56:26 PM |
| Method        | Tune_pos_Mid.m                                 | Operator         | BDAL@DE              |
| Sample Name   | LB40                                           | Instrument       | micrOTOF II          |
| Comment       |                                                |                  | 8213750.1045<br>1    |

Acquisition Parameter

|             |          |              |          |                    |          |
|-------------|----------|--------------|----------|--------------------|----------|
| Source Type | ESI      | Ion Polarity | Positive | Set Corrector Fill | 48.2 V   |
| n/a         | n/a      | n/a          | n/a      | n/a                | n/a      |
| Scan Begin  | 50 m/z   | n/a          | n/a      | Set Reflector      | 1800.0 V |
| Scan End    | 3000 m/z | n/a          | n/a      | Set Flight Tube    | 8600.0 V |
|             |          | n/a          | n/a      | Set Detector TOF   | 2021.6 V |

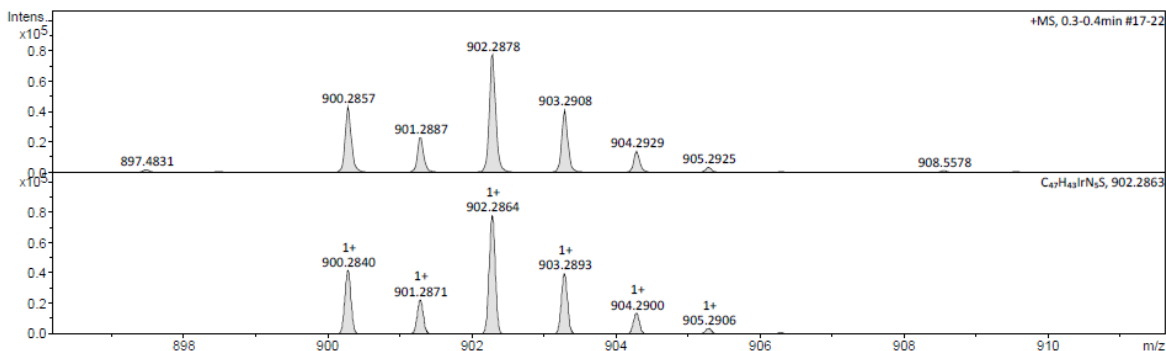

| Meas. m/z # | Ion | Formula                                            | m/z err [ppm] | Mean err [ppm] | rdB  | N-Rule | e <sup>-</sup> | Conf | mSigma | Std I | Std Mean | m/z  | Std I | VarNorm | Std m/z | Diff | Std Comb | Dev  |
|-------------|-----|----------------------------------------------------|---------------|----------------|------|--------|----------------|------|--------|-------|----------|------|-------|---------|---------|------|----------|------|
| 902.2878    | 1+  | C <sub>47</sub> H <sub>43</sub> IrN <sub>5</sub> S | 902.286295    | -1.5           | -1.9 | 29.5   | ok             | even | 13.4   | 10.4  | n.a.     | n.a. | n.a.  | n.a.    | n.a.    | n.a. | n.a.     | n.a. |

Figure S28. High-resolution HR-ESI-MS spectrum of compound Ir-M2.

Service de Spectrométrie de Masse - Fédération de Chimie Le Bel - FR 2010 - CNRS / UDS

Analysis Info

Analysis Name O46157SK.d  
 Method esi wide pos.m  
 Sample Name LB35  
 Comment

Acquisition Date 15/11/2022 16:53:49  
 Operator admin  
 Instrument micrOTOF

Acquisition Parameter

|              |          |                    |         |            |           |                 |         |
|--------------|----------|--------------------|---------|------------|-----------|-----------------|---------|
| Source Type  | ESI      | Capillary          | 4500 V  | Nebulizer  | 0.5 Bar   | Corona          | 195 nA  |
| Ion Polarity | Positive | Set Capillary Exit | 150.0 V | Dry Gas    | 4.0 l/min | Set Hexapole RF | 300.0 V |
| n/a          | n/a      | Set Skimmer 1      | 50.0 V  | Dry Heater | 200 °C    | APCI Heater     | 514 °C  |

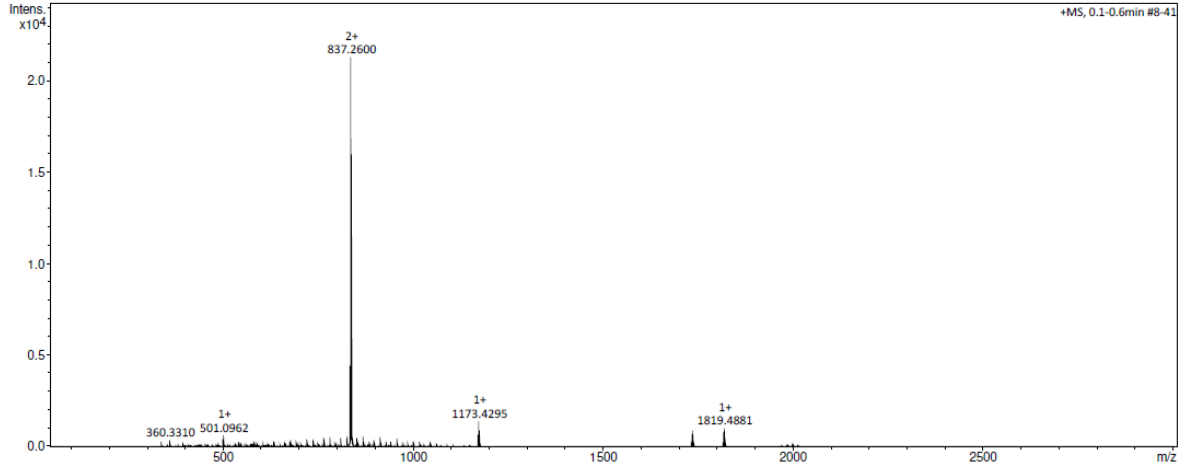

Bruker Daltonics DataAnalysis 3.1

printed: 16/11/2022 10:47:39

Page 1 of 1

Mass Spectrum HR Report

Analysis Info

Analysis Name Z:\O46157SK.d  
 Method esi wide pos.m  
 Sample Name LB35  
 Comment

Acquisition Date 15/11/2022 16:53:49  
 Operator admin  
 Instrument micrOTOF 213750.00066

Acquisition Parameter

|             |          |                    |          |                    |        |
|-------------|----------|--------------------|----------|--------------------|--------|
| Source Type | ESI      | Ion Polarity       | Positive | Set Corrector Fill | 74 V   |
| n/a         | n/a      | Set Capillary Exit | 150.0 V  | Set Pulsar Pull    | 799 V  |
| Scan Begin  | 50 m/z   | Set Hexapole RF    | 300.0 V  | Set Pulsar Push    | 799 V  |
| Scan End    | 3000 m/z | Set Skimmer 1      | 50.0 V   | Set Reflector      | 1700 V |
|             |          | Set Hexapole 1     | 24.3 V   | Set Flight Tube    | 8600 V |
|             |          |                    |          | Set Detector TOF   | 2311 V |

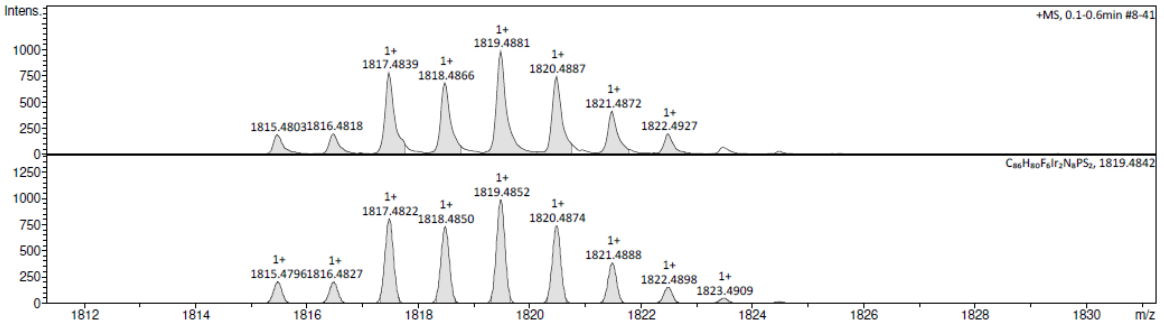

| Meas. m/z | # | Ion Formula      | m/z       | err [ppm] | mSigma | # mSigma | Score  | rdb  | e <sup>-</sup> Conf | N-Rule |
|-----------|---|------------------|-----------|-----------|--------|----------|--------|------|---------------------|--------|
| 837.2600  | 1 | C86H80Ir2N8S2    | 837.2597  | 0.3       | 10.7   | 1        | 100.00 | 52.0 | even                | ok     |
| 1819.4881 | 1 | C86H80F6Ir2N8PS2 | 1819.4842 | -1.6      | 29.1   | 1        | 100.00 | 49.5 | even                | ok     |

Bruker Compass DataAnalysis 4.2

printed: 16/11/2022 10:46:29

Page 1 of 1



## Mass Spectrum HR Report

|                              |                |                    |                     |                         |
|------------------------------|----------------|--------------------|---------------------|-------------------------|
| <b>Analysis Info</b>         |                | Acquisition Date   | 15/11/2022 16:53:49 |                         |
| Analysis Name                | Z:\O46157SK.d  | Operator           | admin               |                         |
| Method                       | esi wide pos.m | Instrument         | micrOTOF            | 213750.00066            |
| Sample Name                  | LB35           | Comment            |                     |                         |
| <b>Acquisition Parameter</b> |                |                    |                     |                         |
| Source Type                  | ESI            | Ion Polarity       | Positive            | Set Corrector Fill 74 V |
| n/a                          | n/a            | Set Capillary Exit | 150.0 V             | Set Pulsar Pull 799 V   |
| Scan Begin                   | 50 m/z         | Set Hexapole RF    | 300.0 V             | Set Pulsar Push 799 V   |
| Scan End                     | 3000 m/z       | Set Skimmer 1      | 50.0 V              | Set Reflector 1700 V    |
|                              |                | Set Hexapole 1     | 24.3 V              | Set Flight Tube 8600 V  |
|                              |                |                    |                     | Set Detector TOF 2311 V |

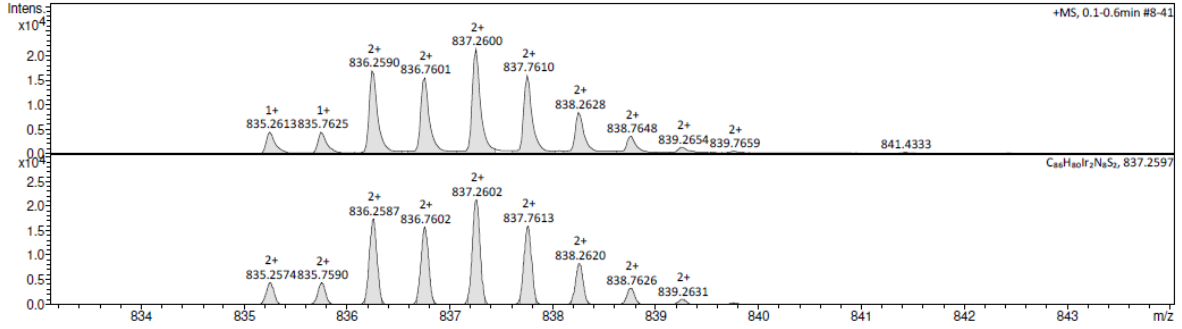

| Meas. m/z | # | Ion Formula   | m/z      | err [ppm] | mSigma | # mSigma | Score  | rdb  | e <sup>-</sup> Conf | N-Rule |
|-----------|---|---------------|----------|-----------|--------|----------|--------|------|---------------------|--------|
| 837.2600  | 1 | C66H80Ir2NaS2 | 837.2597 | 0.3       | 10.7   | 1        | 100.00 | 52.0 | even                | ok     |

**Figure S29.** High-resolution HR-ESI-MS spectrum of compound **Ir-D1**.

Service de Spectrométrie de Masse - Fédération de Chimie Le Bel - FR 2010 - CNRS / UDS

Analysis Info

|               |                |                  |                     |
|---------------|----------------|------------------|---------------------|
| Analysis Name | O46159SK.d     | Acquisition Date | 15/11/2022 17:04:09 |
| Method        | esi wide pos.m | Operator         | admin               |
| Sample Name   | LB34           | Instrument       | micrOTOF            |
| Comment       |                |                  |                     |

Acquisition Parameter

|              |          |                    |         |            |           |                 |         |
|--------------|----------|--------------------|---------|------------|-----------|-----------------|---------|
| Source Type  | ESI      | Capillary          | 4500 V  | Nebulizer  | 0.5 Bar   | Corona          | 195 nA  |
| Ion Polarity | Positive | Set Capillary Exit | 150.0 V | Dry Gas    | 4.0 l/min | Set Hexapole RF | 300.0 V |
| n/a          | n/a      | Set Skimmer 1      | 50.0 V  | Dry Heater | 200 °C    | APCI Heater     | 514 °C  |

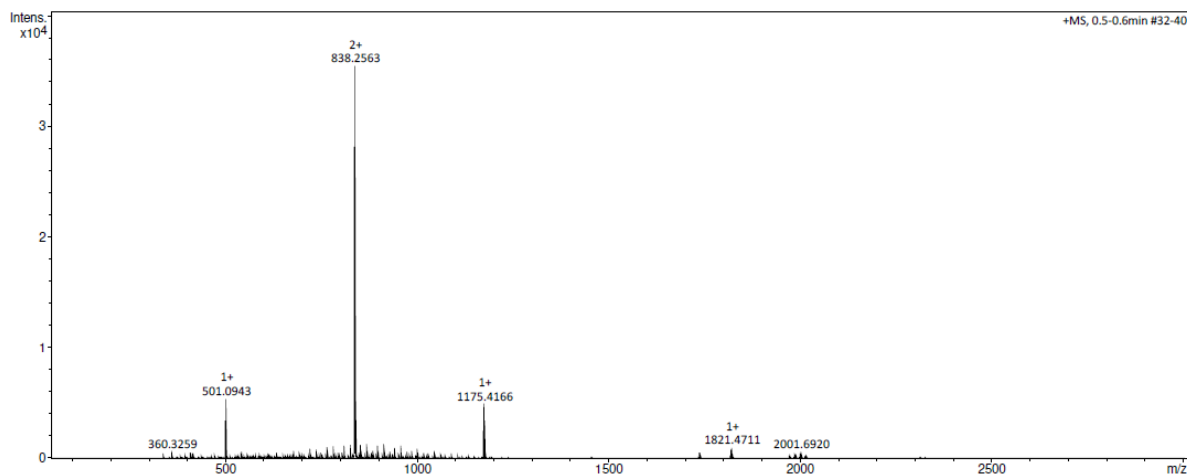

Bruker Daltonics DataAnalysis 3.1

printed: 16/11/2022 11:02:41

Page 1 of 1

Mass Spectrum HR Report

Analysis Info

|               |                |                  |                     |
|---------------|----------------|------------------|---------------------|
| Analysis Name | Z:\O46159SK.d  | Acquisition Date | 15/11/2022 17:04:09 |
| Method        | esi wide pos.m | Operator         | admin               |
| Sample Name   | LB34           | Instrument       | micrOTOF            |
| Comment       |                |                  | 213750.00066        |

Acquisition Parameter

|             |          |                    |          |                    |        |
|-------------|----------|--------------------|----------|--------------------|--------|
| Source Type | ESI      | Ion Polarity       | Positive | Set Corrector Fill | 74 V   |
| n/a         | n/a      | Set Capillary Exit | 150.0 V  | Set Pulsar Pull    | 799 V  |
| Scan Begin  | 50 m/z   | Set Hexapole RF    | 300.0 V  | Set Pulsar Push    | 799 V  |
| Scan End    | 3000 m/z | Set Skimmer 1      | 50.0 V   | Set Reflector      | 1700 V |
|             |          | Set Hexapole 1     | 24.3 V   | Set Flight Tube    | 8600 V |
|             |          |                    |          | Set Detector TOF   | 2311 V |

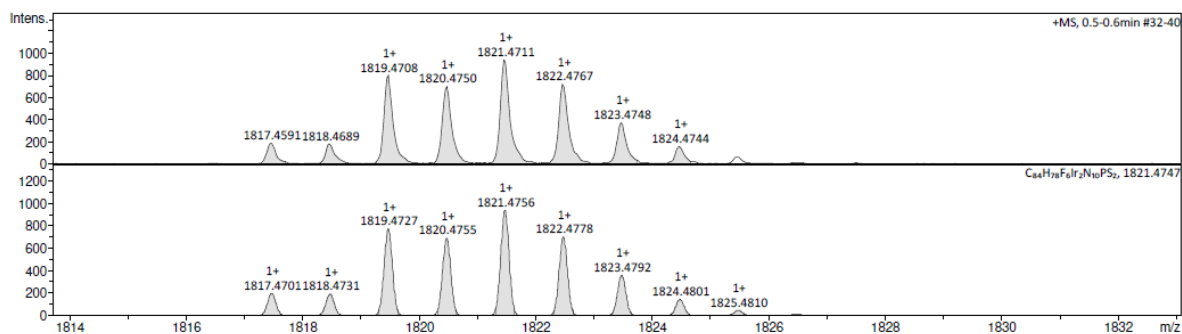

| Meas. m/z | # | Ion Formula       | m/z       | err [ppm] | mSigma | # mSigma | Score  | rdb  | e <sup>-</sup> Conf | N-Rule |
|-----------|---|-------------------|-----------|-----------|--------|----------|--------|------|---------------------|--------|
| 838.2563  | 1 | C84H78Ir2N10S2    | 838.2550  | -1.0      | 12.1   | 1        | 100.00 | 52.0 | even                | ok     |
| 1821.4711 | 1 | C44H78F6Ir2N10PS2 | 1821.4747 | 2.4       | 23.1   | 1        | 100.00 | 49.5 | even                | ok     |

Bruker Compass DataAnalysis 4.2

printed: 16/11/2022 11:02:10

Page 1 of 1

## Mass Spectrum HR Report

|                      |                |                  |                     |  |
|----------------------|----------------|------------------|---------------------|--|
| <b>Analysis Info</b> |                | Acquisition Date | 15/11/2022 17:04:09 |  |
| Analysis Name        | Z:\O46159SK.d  | Operator         | admin               |  |
| Method               | esi wide pos.m | Instrument       | micrOTOF            |  |
| Sample Name          | LB34           |                  | 213750.00066        |  |
| Comment              |                |                  |                     |  |

|                              |          |                    |          |                    |        |
|------------------------------|----------|--------------------|----------|--------------------|--------|
| <b>Acquisition Parameter</b> |          |                    |          |                    |        |
| Source Type                  | ESI      | Ion Polarity       | Positive | Set Corrector Fill | 74 V   |
| n/a                          | n/a      | Set Capillary Exit | 150.0 V  | Set Pulsar Pull    | 799 V  |
| Scan Begin                   | 50 m/z   | Set Hexapole RF    | 300.0 V  | Set Pulsar Push    | 1700 V |
| Scan End                     | 3000 m/z | Set Skimmer 1      | 50.0 V   | Set Reflector      | 8600 V |
|                              |          | Set Hexapole 1     | 24.3 V   | Set Flight Tube    | 2311 V |
|                              |          |                    |          | Set Detector TOF   |        |

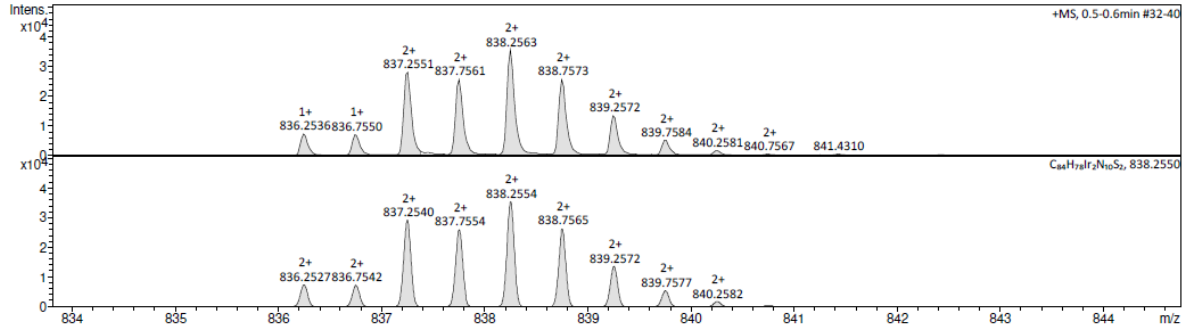

| Meas. m/z | # | Ion Formula    | m/z      | err [ppm] | mSigma | # mSigma | Score  | rdb  | e <sup>-</sup> Conf | N-Rule |
|-----------|---|----------------|----------|-----------|--------|----------|--------|------|---------------------|--------|
| 838.2563  | 1 | C64H78Ir2N10S2 | 838.2550 | -1.0      | 12.1   | 1        | 100.00 | 52.0 | even                | ok     |

**Figure S30.** High-resolution HR-ESI-MS spectrum of compound **Ir-D2**.

## Supplementary Tables

**Table S1.** Crystal data and structure refinement for compound **Ir-M1 (CCDC 2338499)**.

|                                 |                                                                                                                                                                   |
|---------------------------------|-------------------------------------------------------------------------------------------------------------------------------------------------------------------|
| Identification code             | emmlb230306sq                                                                                                                                                     |
| Empirical formula               | C <sub>48</sub> H <sub>44</sub> F <sub>6</sub> Ir N <sub>4</sub> P S, solvent<br>'C <sub>48</sub> H <sub>44</sub> Ir N <sub>4</sub> S, F <sub>6</sub> P, solvent' |
| Formula weight                  | 1046.10                                                                                                                                                           |
| Temperature                     | 173(2) K                                                                                                                                                          |
| Wavelength                      | 0.71073 Å                                                                                                                                                         |
| Crystal system, space group     | Monoclinic, P 21/c                                                                                                                                                |
| Unit cell dimensions            | $a = 9.1429(7)$ Å $\alpha = 90^\circ$<br>$b = 19.1054(14)$ Å $\beta = 95.933(3)^\circ$<br>$c = 26.870(2)$ Å $\gamma = 90^\circ$                                   |
| Volume                          | 4668.5(6) Å <sup>3</sup>                                                                                                                                          |
| Z, Calculated density           | 4, 1.488 Mg/m <sup>3</sup>                                                                                                                                        |
| Absorption coefficient          | 3.000 mm <sup>-1</sup>                                                                                                                                            |
| $F(000)$                        | 2088                                                                                                                                                              |
| Crystal size                    | 0.180 x 0.100 x 0.100 mm                                                                                                                                          |
| Theta range for data collection | 1.524 to 28.005°                                                                                                                                                  |
| Limiting indices                | -12 ≤ h ≤ 12, -25 ≤ k ≤ 25, -35 ≤ l ≤ 35                                                                                                                          |
| Reflections collected / unique  | 261434 / 11241 [R(int) = 0.1648]                                                                                                                                  |
| Completeness to theta = 25.242  | 100.0%                                                                                                                                                            |
| Absorption correction           | Semi-empirical from equivalents                                                                                                                                   |
| Max. and min. transmission      | 0.7456 and 0.6547                                                                                                                                                 |
| Refinement method               | Full-matrix least-squares on $F^2$                                                                                                                                |
| Data / restraints / parameters  | 11241 / 85 / 611                                                                                                                                                  |
| Goodness-of-fit on $F^2$        | 1.005                                                                                                                                                             |
| Final R indices [I > 2σ(I)]     | R1 = 0.0427, wR2 = 0.0863                                                                                                                                         |
| R indices (all data)            | R1 = 0.0790, wR2 = 0.0997                                                                                                                                         |
| Extinction coefficient          | n/a                                                                                                                                                               |
| Largest diff. peak and hole     | 2.687 and -0.738 e Å <sup>-3</sup>                                                                                                                                |

**Table S2.** Crystal data and structure refinement for compound **Ir-M2 (CCDC 2338500)**.

|                                      |                                                                                                                                                                   |                             |
|--------------------------------------|-------------------------------------------------------------------------------------------------------------------------------------------------------------------|-----------------------------|
| Identification code                  | emmlb230206sq                                                                                                                                                     |                             |
| Empirical formula                    | C <sub>47</sub> H <sub>43</sub> F <sub>6</sub> Ir N <sub>5</sub> P S, solvent<br>'C <sub>47</sub> H <sub>43</sub> Ir N <sub>5</sub> S, F <sub>6</sub> P, solvent' |                             |
| Formula weight                       | 1047.09                                                                                                                                                           |                             |
| Temperature                          | 173(2) K                                                                                                                                                          |                             |
| Wavelength                           | 0.71073 Å                                                                                                                                                         |                             |
| Crystal system, space group          | Triclinic, P -1                                                                                                                                                   |                             |
| Unit cell dimensions                 | $a = 13.393(4) \text{ \AA}$                                                                                                                                       | $\alpha = 72.225(9)^\circ$  |
|                                      | $b = 13.862(4) \text{ \AA}$                                                                                                                                       | $\beta = 81.792(10)^\circ$  |
|                                      | $c = 13.953(4) \text{ \AA}$                                                                                                                                       | $\gamma = 70.801(11)^\circ$ |
| Volume                               | 2326.9(11) Å <sup>3</sup>                                                                                                                                         |                             |
| Z, Calculated density                | 2, 1.494 Mg/m <sup>3</sup>                                                                                                                                        |                             |
| Absorption coefficient               | 3.010 mm <sup>-1</sup>                                                                                                                                            |                             |
| F(000)                               | 1044                                                                                                                                                              |                             |
| Crystal size                         | 0.100 x 0.090 x 0.090 mm                                                                                                                                          |                             |
| Theta range for data collection      | 1.612 to 28.258°                                                                                                                                                  |                             |
| Limiting indices                     | -17<=h<=16, -18<=k<=18, -18<=l<=18                                                                                                                                |                             |
| Reflections collected / unique       | 52750 / 11335 [R(int) = 0.1102]                                                                                                                                   |                             |
| Completeness to theta = 25.242       | 100.0%                                                                                                                                                            |                             |
| Absorption correction                | Semi-empirical from equivalents                                                                                                                                   |                             |
| Max. and min. transmission           | 0.7456 and 0.6819                                                                                                                                                 |                             |
| Refinement method                    | Full-matrix least-squares on $F^2$                                                                                                                                |                             |
| Data / restraints / parameters       | 11335 / 6 / 539                                                                                                                                                   |                             |
| Goodness-of-fit on $F^2$             | 1.008                                                                                                                                                             |                             |
| Final R indices [ $I > 2\sigma(I)$ ] | R1 = 0.0573, wR2 = 0.0953                                                                                                                                         |                             |
| R indices (all data)                 | R1 = 0.1211, wR2 = 0.1142                                                                                                                                         |                             |
| Extinction coefficient               | n/a                                                                                                                                                               |                             |
| Largest diff. peak and hole          | 2.022 and -1.316 e Å <sup>-3</sup>                                                                                                                                |                             |

**Table S3.** Crystal data and structure refinement for compound **Ir-D1 (CCDC 2338501)**.

|                                 |                                                                                                                                                   |
|---------------------------------|---------------------------------------------------------------------------------------------------------------------------------------------------|
| Identification code             | mmlb230609                                                                                                                                        |
| Empirical formula               | C <sub>92</sub> H <sub>92</sub> Cl <sub>12</sub> F <sub>12</sub> Ir <sub>2</sub> N <sub>8</sub> P <sub>2</sub> S <sub>2</sub>                     |
| Formula weight                  | 2473.59                                                                                                                                           |
| Temperature                     | 120(2) K                                                                                                                                          |
| Wavelength                      | 0.71073 Å                                                                                                                                         |
| Crystal system, space group     | Triclinic, P -1                                                                                                                                   |
| Unit cell dimensions            | $a = 12.8187(5)$ Å $\alpha = 109.656(2)^\circ$<br>$b = 14.2975(6)$ Å $\beta = 108.743(2)^\circ$<br>$c = 16.2225(8)$ Å $\gamma = 101.975(2)^\circ$ |
| Volume                          | 2479.90(19) Å <sup>3</sup>                                                                                                                        |
| Z, Calculated density           | 1, 1.656 Mg/m <sup>3</sup>                                                                                                                        |
| Absorption coefficient          | 3.150 mm <sup>-1</sup>                                                                                                                            |
| F(000)                          | 1228                                                                                                                                              |
| Crystal size                    | 0.100 x 0.080 x 0.060 mm                                                                                                                          |
| Theta range for data collection | 1.944 to 30.074°                                                                                                                                  |
| Limiting indices                | -16<= <i>h</i> <=18, -20<= <i>k</i> <=20, -22<= <i>l</i> <=22                                                                                     |
| Reflections collected / unique  | 81496 / 14497 [R(int) = 0.0632]                                                                                                                   |
| Completeness to theta = 25.242  | 99.9%                                                                                                                                             |
| Absorption correction           | Semi-empirical from equivalents                                                                                                                   |
| Max. and min. transmission      | 0.7460 and 0.6895                                                                                                                                 |
| Refinement method               | Full-matrix least-squares on $F^2$                                                                                                                |
| Data / restraints / parameters  | 14497 / 0 / 595                                                                                                                                   |
| Goodness-of-fit on $F^2$        | 1.031                                                                                                                                             |
| Final R indices [I>2sigma(I)]   | R1 = 0.0357, wR2 = 0.0722                                                                                                                         |
| R indices (all data)            | R1 = 0.0476, wR2 = 0.0774                                                                                                                         |
| Extinction coefficient          | n/a                                                                                                                                               |
| Largest diff. peak and hole     | 0.965 and -0.974 e Å <sup>-3</sup>                                                                                                                |

**Table S4.** Crystal data and structure refinement for compound **Ir-D2 (CCDC 2338502)**.

|                                      |                                                                                                                                                                                                                                                                                                 |                           |
|--------------------------------------|-------------------------------------------------------------------------------------------------------------------------------------------------------------------------------------------------------------------------------------------------------------------------------------------------|---------------------------|
| Identification code                  | emmlb230531sq                                                                                                                                                                                                                                                                                   |                           |
| Empirical formula                    | C <sub>91</sub> H <sub>92</sub> Cl <sub>14</sub> F <sub>12</sub> Ir <sub>2</sub> N <sub>10</sub> P <sub>2</sub> S <sub>2</sub> , solvent<br>'C <sub>84</sub> H <sub>78</sub> Ir <sub>2</sub> N <sub>10</sub> S <sub>2</sub> , 2(F <sub>6</sub> P), 7(CH <sub>2</sub> Cl <sub>2</sub> ),solvent' |                           |
| Formula weight                       | 2560.50                                                                                                                                                                                                                                                                                         |                           |
| Temperature                          | 120(2) K                                                                                                                                                                                                                                                                                        |                           |
| Wavelength                           | 0.71073 Å                                                                                                                                                                                                                                                                                       |                           |
| Crystal system, space group          | Monoclinic, P 21/c                                                                                                                                                                                                                                                                              |                           |
| Unit cell dimensions                 | $a = 20.331(5) \text{ \AA}$                                                                                                                                                                                                                                                                     | $\alpha = 90^\circ$       |
|                                      | $b = 17.476(4) \text{ \AA}$                                                                                                                                                                                                                                                                     | $\beta = 92.474(7)^\circ$ |
|                                      | $c = 16.089(4) \text{ \AA}$                                                                                                                                                                                                                                                                     | $\gamma = 90^\circ$       |
| Volume                               | 5711(2) Å <sup>3</sup>                                                                                                                                                                                                                                                                          |                           |
| Z, Calculated density                | 2, 1.489 Mg/m <sup>3</sup>                                                                                                                                                                                                                                                                      |                           |
| Absorption coefficient               | 2.784 mm <sup>-1</sup>                                                                                                                                                                                                                                                                          |                           |
| F(000)                               | 2540                                                                                                                                                                                                                                                                                            |                           |
| Crystal size                         | 0.220 x 0.200 x 0.160 mm                                                                                                                                                                                                                                                                        |                           |
| Theta range for data collection      | 1.964 to 28.224°                                                                                                                                                                                                                                                                                |                           |
| Limiting indices                     | -26<=h<=26, -22<=k<=23, -21<=l<=21                                                                                                                                                                                                                                                              |                           |
| Reflections collected / unique       | 149962 / 13771 [R(int) = 0.0988]                                                                                                                                                                                                                                                                |                           |
| Completeness to theta = 25.242       | 100.0%                                                                                                                                                                                                                                                                                          |                           |
| Absorption correction                | Semi-empirical from equivalents                                                                                                                                                                                                                                                                 |                           |
| Max. and min. transmission           | 0.7456 and 0.5039                                                                                                                                                                                                                                                                               |                           |
| Refinement method                    | Full-matrix least-squares on $F^2$                                                                                                                                                                                                                                                              |                           |
| Data / restraints / parameters       | 13771 / 0 / 613                                                                                                                                                                                                                                                                                 |                           |
| Goodness-of-fit on $F^2$             | 1.098                                                                                                                                                                                                                                                                                           |                           |
| Final R indices [ $I > 2\sigma(I)$ ] | R1 = 0.0781, wR2 = 0.2059                                                                                                                                                                                                                                                                       |                           |
| R indices (all data)                 | R1 = 0.1140, wR2 = 0.2393                                                                                                                                                                                                                                                                       |                           |
| Extinction coefficient               | n/a                                                                                                                                                                                                                                                                                             |                           |
| Largest diff. peak and hole          | 2.847 and -2.499 e Å <sup>-3</sup>                                                                                                                                                                                                                                                              |                           |

**Table S5.** Selected structural parameters of the experimental and theoretical structure of **Ir-D1**. Bond lengths are in [Å], angles and dihedral angles are in [°]. Theoretical results covers *meso*- and ( $\Delta,\Delta$ ) stereoisomers, ground states and T<sub>1</sub> structures. *meso*-**Ir-D1** adopt a C<sub>i</sub> symmetry and  $\Delta\Delta$ -**Ir-D1** a C<sub>2</sub> symmetry at ground state. See Figure S7 for atom numerotation. *Bq*\* is the barycenter of C<sub>1</sub> and C<sub>1</sub>'.

| Bond                                                                | Exp    | S <sub>0</sub> $\Delta\Delta$ | T <sub>1</sub> $\Delta\Delta$ | S <sub>0</sub> $\Delta\Delta$ | T <sub>1</sub> $\Delta\Delta$ |
|---------------------------------------------------------------------|--------|-------------------------------|-------------------------------|-------------------------------|-------------------------------|
| Ir-N <sub>1</sub>                                                   | 2.122  | 2.172                         | 2.193                         | 2.17                          | 2.197                         |
| Ir-N <sub>2</sub>                                                   | 2.165  | 2.197                         | 2.208                         | 2.20                          | 2.207                         |
| Ir-N <sub>3</sub>                                                   | 2.053  | 2.070                         | 2.068                         | 2.07                          | 2.074                         |
| Ir-N <sub>4</sub>                                                   | 2.047  | 2.071                         | 2.071                         | 2.07                          | 2.065                         |
| Ir-C <sub>32</sub>                                                  | 2.005  | 2.017                         | 1.991                         | 2.02                          | 1.993                         |
| Ir-C <sub>43</sub>                                                  | 2.008  | 2.016                         | 1.987                         | 2.02                          | 1.989                         |
| Ir'-N <sub>1</sub> '                                                | 2.122  | 2.172                         | 2.171                         | 2.17                          | 2.184                         |
| Ir'-N <sub>2</sub> '                                                | 2.165  | 2.197                         | 2.192                         | 2.20                          | 2.190                         |
| Ir'-N <sub>3</sub> '                                                | 2.053  | 2.070                         | 2.068                         | 2.07                          | 2.065                         |
| Ir'-N <sub>4</sub> '                                                | 2.047  | 2.071                         | 2.070                         | 2.07                          | 2.074                         |
| Ir'-C <sub>32</sub> '                                               | 2.005  | 2.017                         | 2.019                         | 2.02                          | 2.019                         |
| Ir'-C <sub>43</sub> '                                               | 2.008  | 2.016                         | 2.018                         | 2.02                          | 2.015                         |
| <b>Angle</b>                                                        |        |                               |                               |                               |                               |
| N <sub>1</sub> -C <sub>1</sub> -C <sub>1</sub> '-N <sub>1</sub> '   | 180.00 | 180.00                        | -179.57                       | 178.82                        | 176.63                        |
| N <sub>1</sub> -C <sub>2</sub> -C <sub>3</sub> -N <sub>2</sub>      | -1.63  | 3.14                          | 5.62                          | -3.70                         | 5.12                          |
| N <sub>1</sub> '-C <sub>2</sub> '-C <sub>3</sub> '-N <sub>2</sub> ' | 1.63   | -3.14                         | -1.37                         | -3.70                         | 5.88                          |
| X-C <sub>6</sub> -C <sub>8</sub> -C <sub>9</sub>                    | -37.80 | -34.96                        | -29.51                        | 36.54                         | 33.70                         |
| X'-C <sub>6</sub> '-C <sub>8</sub> '-C <sub>9</sub> '               | 37.80  | 34.96                         | 38.08                         | 36.54                         | -35.89                        |
| C <sub>11</sub> - <i>Bq</i> *-C <sub>11</sub> '                     | 177.86 | 180.00                        | 177.56                        | 168.80                        | 160.04                        |



**Table S6.** Selected structural parameters of the experimental and theoretical structure of **Ir-D2**. Bond lengths are in [Å], angles and dihedral angles are in [°]. Theoretical results covers *meso*- and ( $\Delta,\Delta$ ) stereoisomers, ground states and T<sub>1</sub> structures. *meso*-**Ir-D2** adopt a C<sub>i</sub> symmetry and  $\Delta\Delta$ -**Ir-D2** a C<sub>2</sub> symmetry at ground state. See Figure S7 for atom numerotation. *Bq*\* is the barycenter of C<sub>14</sub> and C<sub>14</sub>'.

| Bond                                                                | Exp    | S <sub>0</sub> $\Delta\Delta$ | T <sub>1</sub> $\Delta\Delta$ | S <sub>0</sub> $\Delta\Delta$ | T <sub>1</sub> $\Delta\Delta$ |
|---------------------------------------------------------------------|--------|-------------------------------|-------------------------------|-------------------------------|-------------------------------|
| Ir-N <sub>1</sub>                                                   | 2.149  | 2.177                         | 2.198                         | 2.176                         | 2.179                         |
| Ir-N <sub>2</sub>                                                   | 2.170  | 2.186                         | 2.206                         | 2.189                         | 2.179                         |
| Ir-N <sub>3</sub>                                                   | 2.050  | 2.070                         | 2.070                         | 2.073                         | 2.071                         |
| Ir-N <sub>4</sub>                                                   | 2.049  | 2.072                         | 2.073                         | 2.070                         | 2.070                         |
| Ir-C <sub>32</sub>                                                  | 2.021  | 2.017                         | 1.985                         | 2.017                         | 2.018                         |
| Ir-C <sub>43</sub>                                                  | 2.024  | 2.017                         | 1.989                         | 2.017                         | 2.020                         |
| Ir'-N <sub>1</sub> '                                                | 2.149  | 2.177                         | 2.179                         | 2.176                         | 2.202                         |
| Ir'-N <sub>2</sub> '                                                | 2.170  | 2.186                         | 2.183                         | 2.189                         | 2.204                         |
| Ir'-N <sub>3</sub> '                                                | 2.050  | 2.070                         | 2.068                         | 2.070                         | 2.073                         |
| Ir'-N <sub>4</sub> '                                                | 2.049  | 2.072                         | 2.072                         | 2.073                         | 2.070                         |
| Ir'-C <sub>32</sub> '                                               | 2.021  | 2.017                         | 2.018                         | 2.017                         | 1.985                         |
| Ir'-C <sub>43</sub> '                                               | 2.024  | 2.017                         | 2.019                         | 2.017                         | 1.989                         |
| <b>Angle</b>                                                        |        |                               |                               |                               |                               |
| N <sub>1</sub> -C <sub>1</sub> -C <sub>1</sub> '-N <sub>1</sub> '   | 180.00 | 180.00                        | 179.23                        | 178.85                        | -179.85                       |
| N <sub>1</sub> -C <sub>2</sub> -C <sub>3</sub> -N <sub>2</sub>      | -2.17  | 4.10                          | 0.85                          | -2.58                         | 3.78                          |
| N <sub>1</sub> '-C <sub>2</sub> '-C <sub>3</sub> '-N <sub>2</sub> ' | 2.17   | -4.10                         | -5.33                         | -2.58                         | 2.41                          |
| X-C <sub>6</sub> -C <sub>8</sub> -C <sub>9</sub>                    | 16.59  | -16.83                        | -26.09                        | 28.78                         | -19.23                        |
| X'-C <sub>6</sub> '-C <sub>8</sub> '-C <sub>9</sub> '               | -16.40 | 16.83                         | 19.17                         | 28.78                         | 12.50                         |
| C <sub>11</sub> - <i>Bq</i> *-C <sub>11</sub> '                     | 180.00 | 180.00                        | 167.07                        | 167.65                        | 176.10                        |

**Table S7.** Selected structural parameters of the experimental and theoretical structure of **Ir-M1**. Bond lengths are in [Å], angles and dihedral angles are in [°]. Theoretical results covers ground states and T<sub>1</sub> structures. See Figure S7 for atom numerotation. *Bq*\* is the barycenter of C<sub>14</sub> and C<sub>14</sub>'.

| Bond                                                           | Exp   | S <sub>0</sub> | T <sub>1</sub> |
|----------------------------------------------------------------|-------|----------------|----------------|
| Ir-N <sub>1</sub>                                              | 2.047 | 2.071          | 2.070          |
| Ir-N <sub>2</sub>                                              | 2.051 | 2.066          | 2.066          |
| Ir-N <sub>3</sub>                                              | 2.140 | 2.194          | 2.208          |
| Ir-N <sub>4</sub>                                              | 2.163 | 2.221          | 2.198          |
| Ir-C <sub>32</sub>                                             | 2.015 | 2.020          | 1.986          |
| Ir-C <sub>43</sub>                                             | 1.999 | 2.015          | 2.001          |
| <b>Angle</b>                                                   |       |                |                |
| N <sub>1</sub> -C <sub>2</sub> -C <sub>3</sub> -N <sub>2</sub> | 0.60  | 1.043          | 2.00           |
| X-C <sub>6</sub> -C <sub>8</sub> -C <sub>9</sub>               | 47.70 | 29.38          | 28.88          |

**Table S8.** Selected structural parameters of the experimental and theoretical structure of **Ir-M2**. Bond lengths are in [Å], angles and dihedral angles are in [°]. Theoretical results covers ground states and T1 structures. See Figure S7 for atom numerotation.  $Bq^*$  is the barycenter of  $C_{14}$  and  $C_{14}'$ .

| Bond                                                           | Exp   | S0    | T1     |
|----------------------------------------------------------------|-------|-------|--------|
| Ir-N <sub>1</sub>                                              | 2.023 | 2.071 | 2.070  |
| Ir-N <sub>2</sub>                                              | 2.052 | 2.068 | 2.068  |
| Ir-N <sub>3</sub>                                              | 2.121 | 2.183 | 2.203  |
| Ir-N <sub>4</sub>                                              | 2.191 | 2.223 | 2.206  |
| Ir-C <sub>32</sub>                                             | 2.001 | 2.021 | 1.985  |
| Ir-C <sub>43</sub>                                             | 2.005 | 2.016 | 2.000  |
| Angle                                                          |       |       |        |
| N <sub>1</sub> -C <sub>2</sub> -C <sub>3</sub> -N <sub>2</sub> | 0.18  | 1.924 | 2.30   |
| X-C <sub>6</sub> -C <sub>8</sub> -C <sub>9</sub>               | 28.78 | 17.85 | -16.10 |

**Table S9.** Description of the main peaks of the absorption spectra of the complexes **Ir-M1**, **Ir-M2**, **meso-Ir-D1** and **meso-Ir-D2**.

| Complex      | Singlet State | E [eV] | $\lambda$ (f) [nm] | Transition character                    |                    |
|--------------|---------------|--------|--------------------|-----------------------------------------|--------------------|
| <b>Ir-M1</b> | S6            | 3.229  | 384 (0.9918)       | LC                                      |                    |
|              | S22           | 4.077  | 304 (0.2504)       | L <sub>ppy</sub> C                      |                    |
|              | S37           | 4.502  | 275 (0.2621)       | ML <sub>ppy</sub> CT/L <sub>ppy</sub> C |                    |
| <b>Ir-M2</b> | S5            | 3.069  | 404 (0.5184)       | Mixed, involving the L2 ligand          |                    |
|              | S21           | 3.917  | 317 (0.1575)       |                                         | Mixed              |
|              | S32           | 4.242  | 292 (0.1872)       |                                         | L <sub>ppy</sub> C |
| <b>Ir-D1</b> | S3            | 2.552  | 485 (1.0155)       | MLCT/LC                                 |                    |
|              | S8            | 2.795  | 444 (0.4090)       | MLCT/LLCT                               |                    |
|              | S20           | 3.151  | 393 (0.2739)       | centered on ppy                         |                    |
| <b>Ir-D2</b> | S3            | 2.411  | 514 (1.4372)       | LC                                      |                    |
|              | S9            | 2.643  | 469 (0.5862)       | MLCT/LLCT                               |                    |
|              | S23           | 3.193  | 388 (0.2646)       | L <sub>ppy</sub> C/ML <sub>ppy</sub> CT |                    |

**Table S10.** Summary of the EL characteristics of the NIR LECs exhibiting EL peak wavelength >750 nm along with the corresponding reference.

| Compound <sup>a</sup>            | Driving mode                                  | EL <sub>max</sub><br>(nm)         | L <sub>max</sub><br>( $\mu\text{W cm}^{-2}$ ) <sup>b</sup> | $\eta_{\text{ext, max}}$<br>(%) <sup>c</sup> | t <sub>1/2</sub><br>(h) <sup>d</sup> | Ref.      |
|----------------------------------|-----------------------------------------------|-----------------------------------|------------------------------------------------------------|----------------------------------------------|--------------------------------------|-----------|
| Ru complex<br>(mononuclear)      | 14 V                                          | 880                               | <i>ca.</i> 5.7                                             | 0.075                                        | -                                    | [53]      |
| Ru complex<br>(mononuclear)      | 6 V                                           | 900                               | <i>ca.</i> 2.5                                             | 0.006                                        | -                                    | [53]      |
| Ru complex<br>(mononuclear)      | 15 V                                          | 945                               | <i>ca.</i> 3.1                                             | 0.03                                         | -                                    | [53]      |
| Ru complex<br>(multinuclear)     | 5 V                                           | 780                               | <i>ca.</i> 30.8                                            | 0.013                                        | -                                    | [53]      |
| Ru complex<br>(multinuclear)     | -                                             | 1040                              | -                                                          | -                                            | -                                    | [53]      |
| Ru complex<br>(multinuclear)     | 6 V                                           | 790                               | <i>ca.</i> 0.017                                           | $5.4 \times 10^{-6}$                         | <i>ca.</i> 0.025                     | [54]      |
| Ir complex<br>(mononuclear)      | 4 V                                           | 882                               | 44.1                                                       | 0.036                                        | 0.012                                | [25]      |
| Ir complex<br>(mononuclear)      | 4 V                                           | 790                               | 56.9                                                       | 0.05                                         | 0.003                                | [25]      |
| Ir complex<br>(mononuclear)      | 4 V                                           | 860 <sup>e</sup>                  | 143                                                        | 0.26                                         | 0.017                                | [20]      |
| Copper complex<br>(multinuclear) | I-V-L                                         | <i>ca.</i> 755                    | -                                                          | -                                            | -                                    | [55]      |
| Small molecule                   | 2.5 V                                         | 805                               | 8.19                                                       | 1.49                                         | >5                                   | [56]      |
| Small molecule                   | 75 mA cm <sup>-2</sup>                        | 745, 810                          | 134                                                        | 0.121                                        | >1.67                                | [57]      |
| Small molecule                   | Pulsed current<br>(current ramp) <sup>f</sup> | 825                               | 19                                                         | 0.06                                         | -                                    | [58]      |
| Small molecule                   | Pulsed current<br>(7.5 mA) <sup>g</sup>       | <i>ca.</i> 670/ <i>ca.</i><br>755 | <i>ca.</i> 4.6                                             | 0.16                                         | <i>ca.</i> 1.9                       | [59]      |
| Small molecule                   | 75 mA cm <sup>-2</sup>                        | 675/900                           | 36                                                         | 0.028                                        | >24                                  | [60]      |
| Small molecule                   | Pulsed current<br>(20 mA) <sup>g</sup>        | 656/765                           | 65.9                                                       | 0.014                                        | 0.2                                  | [61]      |
| Small molecule                   | Pulsed current<br>(20 mA) <sup>g</sup>        | 722/778                           | 82.8                                                       | 0.03                                         | 0.81                                 | [61]      |
| Small molecule                   | Pulsed current<br>(20 mA) <sup>g</sup>        | <i>ca.</i> 737/ <i>ca.</i><br>790 | 55.7                                                       | 0.022                                        | 1.1                                  | [61]      |
| Small molecule                   | Pulsed current<br>(20 mA) <sup>g</sup>        | <i>ca.</i> 656/ <i>ca.</i><br>778 | 48.2                                                       | 0.01                                         | 0.92                                 | [61]      |
| Conjugated polymer               | 75 mA cm <sup>-2</sup>                        | 770                               | 107                                                        | 0.093                                        | >20                                  | [62]      |
| <b>Ir-D2</b>                     | 2.5 V                                         | 793 <sup>h</sup>                  | 39.8                                                       | 0.11                                         | 0.27                                 | This work |
|                                  | 2.5 V                                         | 788 <sup>i</sup>                  | 43.3                                                       | 0.14                                         | 0.42                                 |           |
|                                  | 2.5 V                                         | 804 <sup>j</sup>                  | 29.9                                                       | 0.13                                         | 0.49                                 |           |

---

<sup>a</sup> Category of the emissive material. <sup>b</sup>Maximal light output. <sup>c</sup>Maximal external quantum efficiency. <sup>d</sup> Time required for the light output of the device to decay from the maximum value to half of the maximum value. <sup>e</sup> Excimer emission. <sup>f</sup> Pulsed current mode (235 Hz, 50% duty cycle). <sup>g</sup> Pulsed driving scheme based on a block-wave at 1000 Hz and a duty cycle of 50% (average current). <sup>h</sup> Device thickness 107 nm. <sup>i</sup> Device thickness 156 nm. <sup>j</sup> Device thickness 205 nm.

---

Upon excited state geometry optimization, the degeneracy of the lowest singlet and triplet state is not lifted in the four complexes, and the energy difference between these states remains small. For all complexes the computed emission wavelength difference between  $S_1$  and  $T_1$  is smaller than 20 nm (Table 6). Upon these results a contribution of the singlet state to the emission may be fully excluded although no implication of the  $S_1$  was observed experimentally. Inclusion of the SOC perturbation does not qualitatively modify the emission properties, with the four lowest states arising from the mixing of  $S_1$  and  $T_1$  still lying very close in energy (Table S11). The computed radiative rate constants are consistent with the experimental ones, with slightly greater values for the mononuclear than for the binuclear compounds (*cf.* Table 2 and Table S11). Again, it should be noticed that the properties of  $E_4$ , mainly generated by  $S_1$ , are very similar to those of  $E_1$ ,  $E_2$  and  $E_3$  generated by the three components of  $T_1$ .

**Table S11.** Emission wavelengths computed for the four lowest SOC states at the  $T_1$  geometry as well as oscillator strength, radiative rate constant and associated composition for complexes **Ir-M1**, **Ir-M2**, *meso-Ir-D1* and *meso-Ir-D2*. a) value averaged on the three substates contribution following a Boltzmann population of the states at 293 K (see Electronic Supplementary Information for details).

| complex      | SOC state      | $\lambda_{em}$ [nm] | Oscillator strength  | $10^5 k_r$<br>$k_r$ | $10^5 k_r$<br>(average) <sup>a</sup> | % contributing state                                                           |
|--------------|----------------|---------------------|----------------------|---------------------|--------------------------------------|--------------------------------------------------------------------------------|
| <b>Ir-M1</b> | E <sub>1</sub> | 706                 | $1.21 \cdot 10^{-4}$ | 0.16                | 5.8                                  | 89% T <sub>1</sub> , 4% T <sub>2</sub> , 4% T <sub>3</sub> , 2% T <sub>4</sub> |
|              | E <sub>2</sub> | 705                 | $6.19 \cdot 10^{-3}$ | 8.31                |                                      | 88% T <sub>1</sub> , 3% T <sub>3</sub> , 3% S <sub>1</sub> , 2% S <sub>2</sub> |
|              | E <sub>3</sub> | 701                 | $8.58 \cdot 10^{-3}$ | 11.7                |                                      | 93% T <sub>1</sub> , 2% T <sub>4</sub> , 1% S <sub>3</sub>                     |
|              | E <sub>4</sub> | 695                 | $1.31 \cdot 10^{-3}$ | 1.81                |                                      | 85% S <sub>1</sub> , 4% T <sub>2</sub> , 4% T <sub>3</sub> , 3% T <sub>1</sub> |
| <b>Ir-M2</b> | E <sub>1</sub> | 779                 | $1.27 \cdot 10^{-4}$ | 0.14                | 5.2                                  | 91% T <sub>1</sub> , 3% T <sub>2</sub> , 3% T <sub>3</sub> , 2% T <sub>4</sub> |
|              | E <sub>2</sub> | 777                 | $6.04 \cdot 10^{-3}$ | 6.67                |                                      | 91% T <sub>1</sub> , 3% T <sub>3</sub> , 2% S <sub>2</sub>                     |
|              | E <sub>3</sub> | 773                 | $1.03 \cdot 10^{-2}$ | 11.5                |                                      | 93% T <sub>1</sub> , 2% T <sub>4</sub> , 1% S <sub>1</sub>                     |
|              | E <sub>4</sub> | 765                 | $5.39 \cdot 10^{-4}$ | 0.62                |                                      | 87% S <sub>1</sub> , 3% T <sub>2</sub> , 2% T <sub>4</sub> , 2% T <sub>1</sub> |
| <b>Ir-D1</b> | E <sub>1</sub> | 830                 | $1.18 \cdot 10^{-5}$ | 0.01                | 3.6                                  | 93% T <sub>1</sub> , 3% T <sub>4</sub> , 2% T <sub>3</sub>                     |
|              | E <sub>2</sub> | 829                 | $9.23 \cdot 10^{-3}$ | 8.95                |                                      | 92% T <sub>1</sub> , 3% T <sub>4</sub> , 2% S <sub>1</sub>                     |
|              | E <sub>3</sub> | 827                 | $1.99 \cdot 10^{-3}$ | 1.94                |                                      | 93% T <sub>1</sub> , 2% S <sub>1</sub> , 1% S <sub>11</sub>                    |
|              | E <sub>4</sub> | 817                 | $5.25 \cdot 10^{-3}$ | 5.24                |                                      | 88% S <sub>1</sub> , 4% T <sub>1</sub> , 3% T <sub>4</sub> , 1% T <sub>3</sub> |
| <b>Ir-D2</b> | E <sub>1</sub> | 925                 | $1.23 \cdot 10^{-5}$ | 0.009               | 3.2                                  | 94% T <sub>1</sub> , 2% T <sub>4</sub> , 1% T <sub>8</sub>                     |
|              | E <sub>2</sub> | 924                 | $9.52 \cdot 10^{-3}$ | 7.44                |                                      | 94% T <sub>1</sub> , 2% T <sub>2</sub> , 1% S <sub>7</sub>                     |
|              | E <sub>3</sub> | 921                 | $3.14 \cdot 10^{-3}$ | 2.47                |                                      | 92% T <sub>1</sub> , 4% S <sub>1</sub> , 1% S <sub>10</sub>                    |
|              | E <sub>4</sub> | 910                 | $1.46 \cdot 10^{-3}$ | 1.17                |                                      | 89% S <sub>1</sub> , 4% T <sub>1</sub> , 2% T <sub>4</sub> , 1% T <sub>8</sub> |

**Table S12.** Vertical excitations calculated for *meso-Ir-D1* and *meso-Ir-D2*.

| <i>meso-Ir-D1</i> |        |                |           | <i>meso-Ir-D2</i> |        |                |           |
|-------------------|--------|----------------|-----------|-------------------|--------|----------------|-----------|
| State             | E (eV) | $\lambda$ (nm) | f         | State             | E (eV) | $\lambda$ (nm) | f         |
| S1                | 1.895  | 654            | 0.000E+00 | S1                | 1.747  | 710            | 0.000E+00 |
| S2                | 1.914  | 648            | 4.055E-03 | S2                | 1.765  | 702            | 3.468E-03 |
| S3                | 2.552  | 486            | 1.015E+00 | S3                | 2.411  | 514            | 1.437E+00 |
| S4                | 2.623  | 473            | 0.000E+00 | S4                | 2.464  | 503            | 0.000E+00 |
| S5                | 2.632  | 471            | 1.031E-01 | S5                | 2.470  | 502            | 8.810E-03 |
| S6                | 2.666  | 465            | 0.000E+00 | S6                | 2.536  | 489            | 1.453E-02 |
| S7                | 2.770  | 448            | 2.362E-01 | S7                | 2.539  | 488            | 0.000E+00 |
| S8                | 2.795  | 444            | 4.090E-01 | S8                | 2.565  | 483            | 0.000E+00 |
| S9                | 2.800  | 443            | 0.000E+00 | S9                | 2.643  | 469            | 5.862E-01 |
| S10               | 2.826  | 439            | 3.688E-01 | S10               | 2.710  | 457            | 4.197E-01 |
| S11               | 2.850  | 435            | 0.000E+00 | S11               | 2.730  | 454            | 0.000E+00 |
| S12               | 2.924  | 424            | 0.000E+00 | S12               | 2.761  | 449            | 0.000E+00 |
| S13               | 2.935  | 422            | 7.402E-02 | S13               | 2.766  | 448            | 3.190E-02 |
| S14               | 2.957  | 419            | 0.000E+00 | S14               | 2.790  | 444            | 0.000E+00 |
| S15               | 2.957  | 419            | 1.221E-02 | S15               | 2.797  | 443            | 4.610E-02 |

|     |       |     |           |     |       |     |           |
|-----|-------|-----|-----------|-----|-------|-----|-----------|
| S16 | 3.073 | 403 | 2.732E-02 | S16 | 2.913 | 426 | 3.485E-02 |
| S17 | 3.075 | 403 | 0.000E+00 | S17 | 2.924 | 424 | 0.000E+00 |
| S18 | 3.137 | 395 | 0.000E+00 | S18 | 3.038 | 408 | 0.000E+00 |
| S19 | 3.148 | 394 | 0.000E+00 | S19 | 3.046 | 407 | 3.222E-02 |
| S20 | 3.151 | 393 | 2.739E-01 | S20 | 3.055 | 406 | 0.000E+00 |
| S21 | 3.233 | 383 | 6.970E-03 | S21 | 3.173 | 391 | 0.000E+00 |
| S22 | 3.236 | 383 | 0.000E+00 | S22 | 3.191 | 389 | 0.000E+00 |
| S23 | 3.436 | 361 | 0.000E+00 | S23 | 3.193 | 388 | 2.646E-01 |
| S24 | 3.460 | 358 | 0.000E+00 | S24 | 3.238 | 383 | 3.672E-02 |
| S25 | 3.461 | 358 | 9.145E-03 | S25 | 3.270 | 379 | 0.000E+00 |
| T1  | 1.881 | 659 |           | T1  | 1.730 | 717 |           |
| T2  | 1.891 | 656 |           | T2  | 1.741 | 712 |           |
| T3  | 2.127 | 583 |           | T3  | 1.987 | 624 |           |
| T4  | 2.541 | 488 |           | T4  | 2.374 | 522 |           |
| T5  | 2.546 | 487 |           | T5  | 2.417 | 513 |           |
| T6  | 2.567 | 483 |           | T6  | 2.444 | 507 |           |
| T7  | 2.651 | 468 |           | T7  | 2.495 | 497 |           |
| T8  | 2.712 | 457 |           | T8  | 2.529 | 490 |           |
| T9  | 2.715 | 457 |           | T9  | 2.531 | 490 |           |
| T10 | 2.760 | 449 |           | T10 | 2.544 | 487 |           |
| T11 | 2.782 | 446 |           | T11 | 2.583 | 480 |           |
| T12 | 2.807 | 442 |           | T12 | 2.613 | 474 |           |
| T13 | 2.863 | 433 |           | T13 | 2.622 | 473 |           |
| T14 | 2.864 | 433 |           | T14 | 2.665 | 465 |           |
| T15 | 2.882 | 430 |           | T15 | 2.756 | 450 |           |
| T16 | 2.884 | 430 |           | T16 | 2.783 | 446 |           |
| T17 | 2.917 | 425 |           | T17 | 2.888 | 429 |           |
| T18 | 2.936 | 422 |           | T18 | 2.892 | 429 |           |
| T19 | 2.936 | 422 |           | T19 | 2.897 | 428 |           |
| T20 | 2.960 | 419 |           | T20 | 2.925 | 424 |           |
| T21 | 3.057 | 406 |           | T21 | 2.946 | 421 |           |
| T22 | 3.083 | 402 |           | T22 | 2.946 | 421 |           |
| T23 | 3.150 | 394 |           | T23 | 2.963 | 418 |           |
| T24 | 3.158 | 393 |           | T24 | 3.027 | 410 |           |
| T25 | 3.363 | 369 |           | T25 | 3.076 | 403 |           |
| E1  | 1.817 | 682 | 0.000E+00 | E1  | 1.671 | 742 | 0.000E+00 |
| E2  | 1.818 | 682 | 0.000E+00 | E2  | 1.673 | 741 | 0.000E+00 |
| E3  | 1.822 | 681 | 5.577E-05 | E3  | 1.678 | 739 | 0.000E+00 |
| E4  | 1.823 | 680 | 0.000E+00 | E4  | 1.678 | 739 | 3.659E-05 |
| E5  | 1.825 | 679 | 2.469E-02 | E5  | 1.681 | 737 | 2.380E-02 |
| E6  | 1.829 | 678 | 7.967E-03 | E6  | 1.686 | 735 | 1.096E-02 |
| E7  | 1.830 | 677 | 0.000E+00 | E7  | 1.688 | 735 | 0.000E+00 |
| E8  | 1.846 | 672 | 9.892E-03 | E8  | 1.703 | 728 | 8.803E-03 |
| E9  | 2.134 | 581 | 2.748E-05 | E9  | 1.992 | 622 | 2.164E-05 |
| E10 | 2.134 | 581 | 9.316E-04 | E10 | 1.993 | 622 | 4.390E-04 |
| E11 | 2.134 | 581 | 1.689E-03 | E11 | 1.993 | 622 | 1.444E-03 |
| E12 | 2.466 | 503 | 3.907E-01 | E12 | 2.328 | 532 | 0.000E+00 |
| E13 | 2.467 | 502 | 0.000E+00 | E13 | 2.328 | 532 | 0.000E+00 |
| E14 | 2.468 | 502 | 0.000E+00 | E14 | 2.343 | 529 | 0.000E+00 |
| E15 | 2.490 | 498 | 0.000E+00 | E15 | 2.344 | 529 | 5.931E-01 |

|     |       |     |           |     |       |     |           |
|-----|-------|-----|-----------|-----|-------|-----|-----------|
| E16 | 2.496 | 497 | 1.953E-03 | E16 | 2.368 | 523 | 1.728E-03 |
| E17 | 2.496 | 497 | 8.055E-03 | E17 | 2.369 | 523 | 4.907E-03 |
| E18 | 2.519 | 492 | 0.000E+00 | E18 | 2.401 | 516 | 0.000E+00 |
| E19 | 2.571 | 482 | 5.830E-02 | E19 | 2.427 | 511 | 2.086E-01 |
| E20 | 2.620 | 473 | 5.389E-01 | E20 | 2.453 | 506 | 0.000E+00 |
| E21 | 2.631 | 471 | 0.000E+00 | E21 | 2.453 | 505 | 0.000E+00 |
| E22 | 2.631 | 471 | 0.000E+00 | E22 | 2.462 | 504 | 0.000E+00 |
| E23 | 2.646 | 468 | 0.000E+00 | E23 | 2.462 | 503 | 4.547E-01 |
| E24 | 2.672 | 464 | 1.227E-03 | E24 | 2.485 | 499 | 2.034E-03 |
| E25 | 2.673 | 464 | 2.248E-03 | E25 | 2.490 | 498 | 5.810E-04 |
| E26 | 2.678 | 463 | 1.207E-01 | E26 | 2.502 | 495 | 6.634E-02 |
| E27 | 2.691 | 461 | 0.000E+00 | E27 | 2.511 | 494 | 0.000E+00 |
| E28 | 2.703 | 459 | 8.117E-02 | E28 | 2.512 | 494 | 1.073E-01 |
| E29 | 2.719 | 456 | 0.000E+00 | E29 | 2.519 | 492 | 0.000E+00 |
| E30 | 2.720 | 456 | 0.000E+00 | E30 | 2.522 | 492 | 0.000E+00 |
| E31 | 2.726 | 455 | 0.000E+00 | E31 | 2.533 | 489 | 0.000E+00 |
| E32 | 2.767 | 448 | 1.229E-03 | E32 | 2.542 | 488 | 5.831E-03 |
| E33 | 2.768 | 448 | 2.004E-03 | E33 | 2.546 | 487 | 1.687E-03 |
| E34 | 2.774 | 447 | 0.000E+00 | E34 | 2.553 | 486 | 4.395E-02 |
| E35 | 2.779 | 446 | 0.000E+00 | E35 | 2.559 | 484 | 0.000E+00 |
| E36 | 2.782 | 446 | 0.000E+00 | E36 | 2.560 | 484 | 0.000E+00 |
| E37 | 2.782 | 446 | 1.357E-02 | E37 | 2.568 | 483 | 0.000E+00 |
| E38 | 2.789 | 445 | 1.614E-01 | E38 | 2.571 | 482 | 0.000E+00 |
| E39 | 2.793 | 444 | 2.709E-03 | E39 | 2.575 | 481 | 1.078E-01 |
| E40 | 2.796 | 443 | 1.271E-01 | E40 | 2.615 | 474 | 7.296E-05 |
| E41 | 2.800 | 443 | 0.000E+00 | E41 | 2.615 | 474 | 2.683E-05 |
| E42 | 2.820 | 440 | 0.000E+00 | E42 | 2.616 | 474 | 0.000E+00 |
| E43 | 2.823 | 439 | 0.000E+00 | E43 | 2.617 | 474 | 0.000E+00 |
| E44 | 2.824 | 439 | 2.956E-01 | E44 | 2.617 | 474 | 0.000E+00 |
| E45 | 2.828 | 438 | 0.000E+00 | E45 | 2.619 | 473 | 1.079E-02 |
| E46 | 2.863 | 433 | 6.124E-03 | E46 | 2.654 | 467 | 2.731E-04 |
| E47 | 2.863 | 433 | 4.384E-05 | E47 | 2.654 | 467 | 7.819E-05 |
| E48 | 2.863 | 433 | 1.946E-04 | E48 | 2.686 | 462 | 4.406E-01 |
| E49 | 2.864 | 433 | 0.000E+00 | E49 | 2.693 | 460 | 0.000E+00 |
| E50 | 2.864 | 433 | 0.000E+00 | E50 | 2.693 | 460 | 0.000E+00 |
| E51 | 2.864 | 433 | 0.000E+00 | E51 | 2.698 | 459 | 0.000E+00 |
| E52 | 2.869 | 432 | 0.000E+00 | E52 | 2.723 | 455 | 1.431E-01 |
| E53 | 2.869 | 432 | 1.263E-01 | E53 | 2.730 | 454 | 0.000E+00 |
| E54 | 2.881 | 430 | 0.000E+00 | E54 | 2.770 | 448 | 3.695E-02 |
| E55 | 2.883 | 430 | 2.495E-04 | E55 | 2.772 | 447 | 0.000E+00 |
| E56 | 2.883 | 430 | 0.000E+00 | E56 | 2.778 | 446 | 8.089E-05 |
| E57 | 2.883 | 430 | 8.277E-04 | E57 | 2.778 | 446 | 5.662E-03 |
| E58 | 2.884 | 430 | 0.000E+00 | E58 | 2.810 | 441 | 1.453E-01 |
| E59 | 2.886 | 430 | 2.628E-02 | E59 | 2.811 | 441 | 0.000E+00 |
| E60 | 2.927 | 424 | 1.423E-04 | E60 | 2.822 | 439 | 0.000E+00 |
| E61 | 2.927 | 424 | 4.130E-03 | E61 | 2.822 | 439 | 0.000E+00 |
| E62 | 2.935 | 422 | 0.000E+00 | E62 | 2.832 | 438 | 9.446E-02 |
| E63 | 2.936 | 422 | 9.579E-04 | E63 | 2.849 | 435 | 0.000E+00 |
| E64 | 2.937 | 422 | 0.000E+00 | E64 | 2.889 | 429 | 5.218E-04 |
| E65 | 2.938 | 422 | 1.617E-03 | E65 | 2.889 | 429 | 1.783E-03 |



|      |       |     |           |      |       |     |           |
|------|-------|-----|-----------|------|-------|-----|-----------|
| E66  | 2.938 | 422 | 0.000E+00 | E66  | 2.890 | 429 | 3.879E-04 |
| E67  | 2.938 | 422 | 1.024E-03 | E67  | 2.890 | 429 | 0.000E+00 |
| E68  | 2.943 | 421 | 0.000E+00 | E68  | 2.890 | 429 | 0.000E+00 |
| E69  | 2.948 | 421 | 7.125E-02 | E69  | 2.892 | 429 | 0.000E+00 |
| E70  | 2.953 | 420 | 9.672E-02 | E70  | 2.901 | 427 | 1.472E-04 |
| E71  | 2.957 | 419 | 0.000E+00 | E71  | 2.901 | 427 | 4.683E-03 |
| E72  | 2.960 | 419 | 2.129E-02 | E72  | 2.903 | 427 | 1.578E-02 |
| E73  | 2.983 | 416 | 0.000E+00 | E73  | 2.926 | 424 | 3.467E-02 |
| E74  | 2.983 | 416 | 0.000E+00 | E74  | 2.929 | 423 | 0.000E+00 |
| E75  | 2.997 | 414 | 0.000E+00 | E75  | 2.933 | 423 | 0.000E+00 |
| E76  | 3.062 | 405 | 1.173E-04 | E76  | 2.933 | 423 | 0.000E+00 |
| E77  | 3.063 | 405 | 2.168E-03 | E77  | 2.934 | 422 | 0.000E+00 |
| E78  | 3.065 | 405 | 1.149E-02 | E78  | 2.945 | 421 | 0.000E+00 |
| E79  | 3.079 | 403 | 0.000E+00 | E79  | 2.946 | 421 | 5.127E-04 |
| E80  | 3.080 | 402 | 2.688E-02 | E80  | 2.947 | 421 | 0.000E+00 |
| E81  | 3.089 | 401 | 0.000E+00 | E81  | 2.947 | 421 | 9.714E-05 |
| E82  | 3.090 | 401 | 0.000E+00 | E82  | 2.947 | 421 | 0.000E+00 |
| E83  | 3.091 | 401 | 0.000E+00 | E83  | 2.948 | 421 | 6.307E-04 |
| E84  | 3.142 | 395 | 0.000E+00 | E84  | 2.969 | 418 | 0.000E+00 |
| E85  | 3.150 | 394 | 0.000E+00 | E85  | 2.970 | 417 | 0.000E+00 |
| E86  | 3.151 | 393 | 1.233E-01 | E86  | 2.970 | 417 | 0.000E+00 |
| E87  | 3.152 | 393 | 2.905E-04 | E87  | 3.024 | 410 | 7.150E-03 |
| E88  | 3.152 | 393 | 9.944E-03 | E88  | 3.030 | 409 | 1.621E-04 |
| E89  | 3.153 | 393 | 1.405E-01 | E89  | 3.030 | 409 | 2.336E-03 |
| E90  | 3.167 | 391 | 0.000E+00 | E90  | 3.039 | 408 | 0.000E+00 |
| E91  | 3.167 | 391 | 0.000E+00 | E91  | 3.053 | 406 | 2.542E-02 |
| E92  | 3.169 | 391 | 0.000E+00 | E92  | 3.069 | 404 | 0.000E+00 |
| E93  | 3.229 | 384 | 0.000E+00 | E93  | 3.076 | 403 | 0.000E+00 |
| E94  | 3.235 | 383 | 6.978E-03 | E94  | 3.077 | 403 | 0.000E+00 |
| E95  | 3.366 | 368 | 0.000E+00 | E95  | 3.078 | 403 | 0.000E+00 |
| E96  | 3.369 | 368 | 0.000E+00 | E96  | 3.184 | 389 | 0.000E+00 |
| E97  | 3.374 | 367 | 0.000E+00 | E97  | 3.193 | 388 | 0.000E+00 |
| E98  | 3.448 | 360 | 0.000E+00 | E98  | 3.194 | 388 | 2.641E-01 |
| E99  | 3.462 | 358 | 9.136E-03 | E99  | 3.246 | 382 | 3.635E-02 |
| E100 | 3.465 | 358 | 0.000E+00 | E100 | 3.276 | 378 | 0.000E+00 |

**Table S13.** Vertical excitations calculated for Ir-M1 and Ir-M2.

| Ir-M1 |        |                |           | Ir-M2 |        |                |           |
|-------|--------|----------------|-----------|-------|--------|----------------|-----------|
| State | E (eV) | $\lambda$ (nm) | f         | State | E (eV) | $\lambda$ (nm) | f         |
| S1    | 2.294  | 540            | 1.385E-03 | S1    | 2.101  | 590            | 9.396E-04 |
| S2    | 2.913  | 426            | 1.161E-01 | S2    | 2.734  | 454            | 1.160E-01 |
| S3    | 3.014  | 411            | 7.058E-02 | S3    | 2.833  | 438            | 2.224E-02 |
| S4    | 3.131  | 396            | 1.214E-01 | S4    | 2.983  | 416            | 5.005E-01 |
| S5    | 3.155  | 393            | 1.856E-01 | S5    | 3.069  | 404            | 5.184E-01 |
| S6    | 3.229  | 384            | 9.918E-01 | S6    | 3.079  | 403            | 3.568E-01 |
| S7    | 3.258  | 381            | 6.921E-02 | S7    | 3.161  | 392            | 7.967E-02 |
| S8    | 3.378  | 367            | 4.748E-02 | S8    | 3.166  | 392            | 1.200E-01 |
| S9    | 3.447  | 360            | 1.995E-02 | S9    | 3.279  | 378            | 3.699E-03 |

|     |       |     |           |     |       |     |           |
|-----|-------|-----|-----------|-----|-------|-----|-----------|
| S10 | 3.505 | 354 | 1.061E-02 | S10 | 3.311 | 374 | 1.423E-02 |
| S11 | 3.569 | 347 | 1.431E-02 | S11 | 3.324 | 373 | 4.389E-02 |
| S12 | 3.741 | 331 | 7.651E-03 | S12 | 3.566 | 348 | 3.805E-02 |
| S13 | 3.747 | 331 | 7.182E-02 | S13 | 3.684 | 337 | 2.437E-02 |
| S14 | 3.760 | 330 | 3.303E-02 | S14 | 3.754 | 330 | 3.146E-02 |
| S15 | 3.828 | 324 | 3.826E-02 | S15 | 3.764 | 329 | 5.254E-02 |
| S16 | 3.846 | 322 | 4.458E-03 | S16 | 3.779 | 328 | 2.513E-02 |
| S17 | 3.892 | 319 | 7.935E-02 | S17 | 3.793 | 327 | 4.259E-02 |
| S18 | 3.932 | 315 | 1.424E-01 | S18 | 3.849 | 322 | 9.678E-02 |
| S19 | 3.947 | 314 | 3.549E-02 | S19 | 3.886 | 319 | 3.084E-02 |
| S20 | 4.024 | 308 | 2.903E-02 | S20 | 3.894 | 318 | 4.567E-02 |
| S21 | 4.058 | 306 | 1.314E-01 | S21 | 3.917 | 317 | 1.575E-01 |
| S22 | 4.077 | 304 | 2.504E-01 | S22 | 3.933 | 315 | 1.583E-02 |
| S23 | 4.097 | 303 | 8.652E-02 | S23 | 3.949 | 314 | 3.543E-02 |
| S24 | 4.131 | 300 | 5.700E-02 | S24 | 3.993 | 311 | 6.062E-02 |
| S25 | 4.216 | 294 | 1.374E-01 | S25 | 4.081 | 304 | 1.288E-01 |
| S26 | 4.243 | 292 | 8.088E-02 | S26 | 4.119 | 301 | 1.177E-01 |
| S27 | 4.259 | 291 | 5.195E-02 | S27 | 4.122 | 301 | 1.223E-02 |
| S28 | 4.273 | 290 | 2.844E-02 | S28 | 4.126 | 300 | 1.212E-01 |
| S29 | 4.290 | 289 | 8.011E-02 | S29 | 4.167 | 298 | 1.158E-02 |
| S30 | 4.306 | 288 | 3.250E-02 | S30 | 4.175 | 297 | 5.050E-02 |
| S31 | 4.327 | 287 | 2.998E-02 | S31 | 4.220 | 294 | 9.113E-03 |
| S32 | 4.355 | 285 | 8.339E-03 | S32 | 4.242 | 292 | 1.872E-01 |
| S33 | 4.374 | 283 | 6.037E-02 | S33 | 4.276 | 290 | 6.790E-02 |
| S34 | 4.401 | 282 | 1.203E-02 | S34 | 4.285 | 289 | 5.592E-02 |
| S35 | 4.406 | 281 | 1.425E-02 | S35 | 4.334 | 286 | 1.229E-02 |
| S36 | 4.463 | 278 | 4.849E-02 | S36 | 4.365 | 284 | 5.603E-03 |
| S37 | 4.502 | 275 | 2.621E-01 | S37 | 4.398 | 282 | 5.549E-02 |
| S38 | 4.515 | 275 | 6.844E-02 | S38 | 4.413 | 281 | 2.097E-03 |
| S39 | 4.529 | 274 | 4.701E-03 | S39 | 4.423 | 280 | 2.376E-02 |
| S40 | 4.568 | 271 | 2.666E-02 | S40 | 4.440 | 279 | 1.133E-02 |
| T1  | 2.269 | 546 |           | T1  | 2.073 | 598 |           |
| T2  | 2.535 | 489 |           | T2  | 2.361 | 525 |           |
| T3  | 2.790 | 444 |           | T3  | 2.641 | 470 |           |
| T4  | 2.872 | 432 |           | T4  | 2.739 | 453 |           |
| T5  | 2.934 | 423 |           | T5  | 2.876 | 431 |           |
| T6  | 2.939 | 422 |           | T6  | 2.896 | 428 |           |
| T7  | 3.084 | 402 |           | T7  | 2.949 | 420 |           |
| T8  | 3.272 | 379 |           | T8  | 3.064 | 405 |           |
| T9  | 3.352 | 370 |           | T9  | 3.077 | 403 |           |
| T10 | 3.365 | 368 |           | T10 | 3.099 | 400 |           |
| T11 | 3.369 | 368 |           | T11 | 3.191 | 389 |           |
| T12 | 3.382 | 367 |           | T12 | 3.228 | 384 |           |
| T13 | 3.398 | 365 |           | T13 | 3.298 | 376 |           |
| T14 | 3.426 | 362 |           | T14 | 3.341 | 371 |           |
| T15 | 3.518 | 352 |           | T15 | 3.391 | 366 |           |
| T16 | 3.563 | 348 |           | T16 | 3.403 | 364 |           |
| T17 | 3.601 | 344 |           | T17 | 3.485 | 356 |           |
| T18 | 3.623 | 342 |           | T18 | 3.539 | 350 |           |
| T19 | 3.655 | 339 |           | T19 | 3.621 | 342 |           |
| T20 | 3.677 | 337 |           | T20 | 3.664 | 338 |           |
| T21 | 3.760 | 330 |           | T21 | 3.679 | 337 |           |

|     |       |     |
|-----|-------|-----|
| T22 | 3.788 | 327 |
| T23 | 3.838 | 323 |
| T24 | 3.904 | 318 |
| T25 | 3.961 | 313 |
| T26 | 4.021 | 308 |
| T27 | 4.048 | 306 |
| T28 | 4.087 | 303 |
| T29 | 4.123 | 301 |
| T30 | 4.163 | 298 |
| T31 | 4.192 | 296 |
| T32 | 4.211 | 294 |
| T33 | 4.227 | 293 |
| T34 | 4.233 | 293 |
| T35 | 4.250 | 292 |
| T36 | 4.259 | 291 |
| T37 | 4.271 | 290 |
| T38 | 4.283 | 289 |
| T39 | 4.293 | 289 |
| T40 | 4.304 | 288 |

|     |       |     |
|-----|-------|-----|
| T22 | 3.705 | 335 |
| T23 | 3.750 | 331 |
| T24 | 3.804 | 326 |
| T25 | 3.842 | 323 |
| T26 | 3.843 | 323 |
| T27 | 3.874 | 320 |
| T28 | 3.965 | 313 |
| T29 | 4.028 | 308 |
| T30 | 4.040 | 307 |
| T31 | 4.081 | 304 |
| T32 | 4.116 | 301 |
| T33 | 4.123 | 301 |
| T34 | 4.148 | 299 |
| T35 | 4.157 | 298 |
| T36 | 4.194 | 296 |
| T37 | 4.195 | 296 |
| T38 | 4.214 | 294 |
| T39 | 4.222 | 294 |
| T40 | 4.232 | 293 |

|     |       |     |           |
|-----|-------|-----|-----------|
| E1  | 2.176 | 570 | 5.972E-05 |
| E2  | 2.181 | 569 | 5.910E-03 |
| E3  | 2.191 | 566 | 7.059E-03 |
| E4  | 2.199 | 564 | 1.849E-03 |
| E5  | 2.545 | 487 | 1.525E-04 |
| E6  | 2.546 | 487 | 5.654E-04 |
| E7  | 2.547 | 487 | 1.992E-04 |
| E8  | 2.755 | 450 | 2.473E-02 |
| E9  | 2.771 | 447 | 9.278E-04 |
| E10 | 2.773 | 447 | 7.208E-04 |
| E11 | 2.826 | 439 | 2.415E-04 |
| E12 | 2.828 | 438 | 1.048E-03 |
| E13 | 2.831 | 438 | 1.213E-03 |
| E14 | 2.874 | 431 | 2.628E-02 |
| E15 | 2.893 | 428 | 1.592E-03 |
| E16 | 2.898 | 428 | 2.121E-03 |
| E17 | 2.900 | 428 | 1.733E-03 |
| E18 | 2.988 | 415 | 7.147E-04 |
| E19 | 2.989 | 415 | 1.652E-03 |
| E20 | 2.996 | 414 | 7.744E-02 |
| E21 | 3.037 | 408 | 9.603E-02 |
| E22 | 3.056 | 406 | 5.938E-02 |
| E23 | 3.088 | 401 | 6.068E-04 |
| E24 | 3.088 | 401 | 6.103E-03 |
| E25 | 3.089 | 401 | 1.361E-02 |
| E26 | 3.134 | 396 | 1.093E-01 |
| E27 | 3.187 | 389 | 2.699E-01 |
| E28 | 3.241 | 383 | 7.418E-01 |
| E29 | 3.279 | 378 | 3.642E-04 |
| E30 | 3.280 | 378 | 3.246E-02 |
| E31 | 3.280 | 378 | 4.302E-03 |
| E32 | 3.309 | 375 | 5.357E-04 |
| E33 | 3.312 | 374 | 2.869E-03 |

|     |       |     |           |
|-----|-------|-----|-----------|
| E1  | 1.987 | 624 | 1.659E-04 |
| E2  | 1.991 | 623 | 6.341E-03 |
| E3  | 2.002 | 619 | 9.622E-03 |
| E4  | 2.013 | 616 | 1.587E-03 |
| E5  | 2.367 | 524 | 1.333E-04 |
| E6  | 2.369 | 523 | 1.850E-04 |
| E7  | 2.369 | 523 | 9.179E-04 |
| E8  | 2.599 | 477 | 2.856E-02 |
| E9  | 2.600 | 477 | 8.661E-04 |
| E10 | 2.602 | 477 | 1.957E-03 |
| E11 | 2.676 | 463 | 3.526E-02 |
| E12 | 2.798 | 443 | 6.252E-04 |
| E13 | 2.802 | 442 | 3.190E-03 |
| E14 | 2.831 | 438 | 5.306E-02 |
| E15 | 2.845 | 436 | 1.962E-02 |
| E16 | 2.855 | 434 | 2.160E-03 |
| E17 | 2.857 | 434 | 1.727E-03 |
| E18 | 2.862 | 433 | 8.791E-03 |
| E19 | 2.883 | 430 | 4.185E-03 |
| E20 | 2.884 | 430 | 3.623E-03 |
| E21 | 2.888 | 429 | 1.822E-02 |
| E22 | 2.910 | 426 | 2.478E-03 |
| E23 | 2.912 | 426 | 4.645E-03 |
| E24 | 2.914 | 425 | 2.209E-03 |
| E25 | 2.989 | 415 | 3.908E-01 |
| E26 | 3.007 | 412 | 3.989E-01 |
| E27 | 3.014 | 411 | 4.841E-03 |
| E28 | 3.017 | 411 | 1.449E-02 |
| E29 | 3.019 | 411 | 1.229E-02 |
| E30 | 3.064 | 405 | 2.042E-03 |
| E31 | 3.064 | 405 | 8.155E-05 |
| E32 | 3.065 | 405 | 7.515E-04 |
| E33 | 3.083 | 402 | 2.645E-01 |

|     |       |     |           |     |       |     |           |
|-----|-------|-----|-----------|-----|-------|-----|-----------|
| E34 | 3.320 | 373 | 3.848E-03 | E34 | 3.084 | 402 | 1.459E-01 |
| E35 | 3.336 | 372 | 2.022E-03 | E35 | 3.103 | 400 | 2.733E-04 |
| E36 | 3.338 | 371 | 1.829E-03 | E36 | 3.104 | 399 | 2.296E-02 |
| E37 | 3.350 | 370 | 2.316E-03 | E37 | 3.106 | 399 | 4.753E-02 |
| E38 | 3.355 | 370 | 4.182E-03 | E38 | 3.167 | 391 | 6.893E-02 |
| E39 | 3.355 | 370 | 3.318E-03 | E39 | 3.199 | 388 | 4.612E-03 |
| E40 | 3.357 | 369 | 1.953E-03 | E40 | 3.199 | 388 | 2.078E-03 |
| E41 | 3.359 | 369 | 3.691E-03 | E41 | 3.201 | 387 | 1.340E-02 |
| E42 | 3.362 | 369 | 1.048E-02 | E42 | 3.214 | 386 | 1.031E-02 |
| E43 | 3.369 | 368 | 2.937E-03 | E43 | 3.237 | 383 | 2.359E-03 |
| E44 | 3.371 | 368 | 4.651E-04 | E44 | 3.239 | 383 | 2.825E-03 |
| E45 | 3.371 | 368 | 3.658E-04 | E45 | 3.246 | 382 | 2.959E-02 |
| E46 | 3.374 | 367 | 6.238E-03 | E46 | 3.285 | 377 | 5.772E-03 |
| E47 | 3.386 | 366 | 3.857E-02 | E47 | 3.303 | 375 | 2.766E-03 |
| E48 | 3.402 | 364 | 1.186E-02 | E48 | 3.304 | 375 | 2.019E-03 |
| E49 | 3.439 | 361 | 1.633E-03 | E49 | 3.305 | 375 | 3.448E-03 |
| E50 | 3.439 | 360 | 5.949E-04 | E50 | 3.322 | 373 | 3.881E-02 |
| E51 | 3.444 | 360 | 1.066E-02 | E51 | 3.344 | 371 | 9.286E-04 |
| E52 | 3.507 | 353 | 8.126E-03 | E52 | 3.346 | 370 | 3.609E-03 |
| E53 | 3.515 | 353 | 3.265E-03 | E53 | 3.349 | 370 | 6.661E-03 |
| E54 | 3.518 | 352 | 1.211E-03 | E54 | 3.358 | 369 | 1.139E-03 |
| E55 | 3.521 | 352 | 2.114E-03 | E55 | 3.360 | 369 | 2.647E-03 |
| E56 | 3.531 | 351 | 1.775E-03 | E56 | 3.367 | 368 | 1.906E-03 |
| E57 | 3.533 | 351 | 2.030E-03 | E57 | 3.372 | 368 | 1.651E-03 |
| E58 | 3.535 | 351 | 1.436E-03 | E58 | 3.386 | 366 | 6.700E-03 |
| E59 | 3.567 | 348 | 1.230E-02 | E59 | 3.410 | 364 | 5.175E-03 |
| E60 | 3.569 | 347 | 1.420E-02 | E60 | 3.485 | 356 | 3.483E-04 |
| E61 | 3.582 | 346 | 4.440E-03 | E61 | 3.486 | 356 | 1.696E-04 |
| E62 | 3.585 | 346 | 1.500E-03 | E62 | 3.486 | 356 | 2.429E-05 |
| E63 | 3.597 | 345 | 6.968E-03 | E63 | 3.522 | 352 | 1.434E-03 |
| E64 | 3.603 | 344 | 2.218E-03 | E64 | 3.528 | 351 | 1.107E-04 |
| E65 | 3.610 | 343 | 3.383E-03 | E65 | 3.528 | 351 | 1.085E-03 |
| E66 | 3.638 | 341 | 8.006E-03 | E66 | 3.573 | 347 | 3.695E-02 |
| E67 | 3.645 | 340 | 2.446E-03 | E67 | 3.595 | 345 | 9.396E-03 |
| E68 | 3.647 | 340 | 3.711E-03 | E68 | 3.600 | 344 | 2.024E-02 |
| E69 | 3.668 | 338 | 5.483E-03 | E69 | 3.603 | 344 | 5.592E-03 |
| E70 | 3.673 | 338 | 1.303E-03 | E70 | 3.617 | 343 | 5.342E-03 |
| E71 | 3.675 | 337 | 4.415E-04 | E71 | 3.622 | 342 | 1.052E-02 |
| E72 | 3.699 | 335 | 3.638E-02 | E72 | 3.628 | 342 | 7.471E-03 |
| E73 | 3.711 | 334 | 9.149E-03 | E73 | 3.639 | 341 | 3.417E-03 |
| E74 | 3.749 | 331 | 1.768E-02 | E74 | 3.644 | 340 | 4.284E-03 |
| E75 | 3.765 | 329 | 3.463E-02 | E75 | 3.651 | 340 | 3.515E-03 |
| E76 | 3.819 | 325 | 2.529E-03 | E76 | 3.672 | 338 | 1.117E-02 |
| E77 | 3.823 | 324 | 5.366E-04 | E77 | 3.687 | 336 | 1.485E-02 |
| E78 | 3.829 | 324 | 1.156E-03 | E78 | 3.697 | 335 | 2.262E-03 |
| E79 | 3.833 | 323 | 1.671E-03 | E79 | 3.704 | 335 | 4.269E-03 |
| E80 | 3.840 | 323 | 6.176E-03 | E80 | 3.746 | 331 | 2.884E-02 |
| E81 | 3.843 | 323 | 5.238E-03 | E81 | 3.753 | 330 | 1.248E-02 |
| E82 | 3.860 | 321 | 1.722E-02 | E82 | 3.775 | 328 | 2.331E-02 |
| E83 | 3.875 | 320 | 2.731E-03 | E83 | 3.784 | 328 | 1.849E-02 |
| E84 | 3.878 | 320 | 1.665E-03 | E84 | 3.796 | 327 | 6.401E-03 |
| E85 | 3.895 | 318 | 2.066E-02 | E85 | 3.799 | 326 | 8.992E-03 |

|      |       |     |           |      |       |     |           |
|------|-------|-----|-----------|------|-------|-----|-----------|
| E86  | 3.898 | 318 | 1.956E-02 | E86  | 3.802 | 326 | 2.619E-02 |
| E87  | 3.914 | 317 | 5.433E-02 | E87  | 3.814 | 325 | 1.412E-02 |
| E88  | 3.926 | 316 | 1.925E-03 | E88  | 3.837 | 323 | 1.693E-03 |
| E89  | 3.927 | 316 | 4.731E-03 | E89  | 3.841 | 323 | 3.532E-03 |
| E90  | 3.939 | 315 | 4.468E-02 | E90  | 3.847 | 322 | 4.204E-02 |
| E91  | 3.942 | 315 | 1.370E-02 | E91  | 3.853 | 322 | 3.319E-02 |
| E92  | 3.943 | 314 | 3.334E-02 | E92  | 3.868 | 321 | 2.063E-02 |
| E93  | 3.973 | 312 | 4.508E-02 | E93  | 3.873 | 320 | 2.414E-03 |
| E94  | 3.979 | 312 | 3.879E-02 | E94  | 3.882 | 319 | 6.917E-03 |
| E95  | 3.994 | 310 | 3.429E-02 | E95  | 3.889 | 319 | 2.574E-02 |
| E96  | 4.011 | 309 | 3.080E-03 | E96  | 3.897 | 318 | 1.579E-02 |
| E97  | 4.020 | 308 | 2.241E-03 | E97  | 3.898 | 318 | 5.528E-03 |
| E98  | 4.034 | 307 | 7.974E-03 | E98  | 3.904 | 318 | 2.721E-02 |
| E99  | 4.039 | 307 | 3.808E-03 | E99  | 3.921 | 316 | 3.722E-03 |
| E100 | 4.047 | 306 | 9.851E-03 | E100 | 3.924 | 316 | 5.317E-03 |
| E101 | 4.052 | 306 | 1.230E-02 | E101 | 3.938 | 315 | 1.087E-02 |
| E102 | 4.076 | 304 | 6.547E-02 | E102 | 3.942 | 314 | 4.256E-02 |
| E103 | 4.100 | 302 | 1.584E-01 | E103 | 3.959 | 313 | 7.315E-02 |
| E104 | 4.122 | 301 | 1.048E-02 | E104 | 3.976 | 312 | 3.569E-02 |
| E105 | 4.123 | 301 | 1.401E-03 | E105 | 4.004 | 310 | 2.682E-03 |
| E106 | 4.128 | 300 | 5.249E-02 | E106 | 4.006 | 310 | 2.547E-03 |
| E107 | 4.131 | 300 | 3.634E-02 | E107 | 4.014 | 309 | 3.196E-02 |
| E108 | 4.137 | 300 | 5.725E-02 | E108 | 4.027 | 308 | 1.927E-02 |
| E109 | 4.150 | 299 | 1.841E-03 | E109 | 4.034 | 307 | 1.055E-03 |
| E110 | 4.151 | 299 | 5.168E-03 | E110 | 4.035 | 307 | 5.469E-04 |
| E111 | 4.155 | 298 | 8.881E-03 | E111 | 4.038 | 307 | 6.243E-03 |
| E112 | 4.162 | 298 | 8.023E-03 | E112 | 4.048 | 306 | 9.837E-03 |
| E113 | 4.167 | 298 | 1.618E-02 | E113 | 4.050 | 306 | 1.613E-03 |
| E114 | 4.169 | 297 | 2.336E-02 | E114 | 4.059 | 305 | 3.482E-02 |
| E115 | 4.187 | 296 | 1.212E-03 | E115 | 4.082 | 304 | 2.758E-03 |
| E116 | 4.191 | 296 | 5.405E-03 | E116 | 4.084 | 304 | 3.654E-03 |
| E117 | 4.195 | 296 | 4.728E-03 | E117 | 4.086 | 303 | 1.449E-03 |
| E118 | 4.206 | 295 | 1.290E-02 | E118 | 4.110 | 302 | 6.077E-03 |
| E119 | 4.213 | 294 | 9.975E-03 | E119 | 4.111 | 302 | 9.018E-03 |
| E120 | 4.215 | 294 | 1.177E-03 | E120 | 4.111 | 302 | 2.601E-03 |
| E121 | 4.216 | 294 | 7.028E-04 | E121 | 4.114 | 301 | 6.430E-02 |
| E122 | 4.218 | 294 | 4.724E-03 | E122 | 4.121 | 301 | 1.470E-02 |
| E123 | 4.221 | 294 | 2.824E-02 | E123 | 4.126 | 301 | 1.638E-02 |
| E124 | 4.230 | 293 | 6.886E-03 | E124 | 4.128 | 300 | 1.498E-02 |
| E125 | 4.231 | 293 | 2.576E-02 | E125 | 4.130 | 300 | 7.345E-03 |
| E126 | 4.234 | 293 | 9.927E-04 | E126 | 4.140 | 300 | 6.739E-02 |
| E127 | 4.236 | 293 | 1.480E-02 | E127 | 4.146 | 299 | 4.860E-02 |
| E128 | 4.237 | 293 | 3.410E-02 | E128 | 4.153 | 299 | 1.643E-03 |
| E129 | 4.245 | 292 | 4.267E-03 | E129 | 4.154 | 298 | 3.140E-03 |
| E130 | 4.250 | 292 | 1.334E-02 | E130 | 4.160 | 298 | 4.098E-02 |
| E131 | 4.254 | 291 | 3.939E-02 | E131 | 4.163 | 298 | 8.615E-03 |
| E132 | 4.255 | 291 | 2.852E-02 | E132 | 4.165 | 298 | 7.647E-03 |
| E133 | 4.264 | 291 | 3.012E-03 | E133 | 4.165 | 298 | 4.378E-03 |
| E134 | 4.264 | 291 | 6.316E-03 | E134 | 4.172 | 297 | 1.318E-02 |
| E135 | 4.267 | 291 | 2.301E-03 | E135 | 4.188 | 296 | 1.676E-02 |
| E136 | 4.274 | 290 | 3.146E-02 | E136 | 4.193 | 296 | 3.772E-04 |
| E137 | 4.285 | 289 | 8.648E-03 | E137 | 4.195 | 296 | 1.185E-03 |

|      |       |     |           |      |       |     |           |
|------|-------|-----|-----------|------|-------|-----|-----------|
| E138 | 4.288 | 289 | 5.489E-03 | E138 | 4.197 | 295 | 1.180E-03 |
| E139 | 4.291 | 289 | 2.023E-02 | E139 | 4.198 | 295 | 1.649E-03 |
| E140 | 4.295 | 289 | 7.049E-03 | E140 | 4.199 | 295 | 5.007E-03 |
| E141 | 4.297 | 289 | 2.394E-03 | E141 | 4.207 | 295 | 2.643E-02 |
| E142 | 4.299 | 288 | 7.636E-03 | E142 | 4.212 | 294 | 6.211E-04 |
| E143 | 4.303 | 288 | 1.599E-02 | E143 | 4.217 | 294 | 2.928E-03 |
| E144 | 4.308 | 288 | 4.349E-02 | E144 | 4.217 | 294 | 7.087E-04 |
| E145 | 4.320 | 287 | 1.683E-02 | E145 | 4.223 | 294 | 1.358E-03 |
| E146 | 4.328 | 286 | 1.011E-02 | E146 | 4.224 | 293 | 1.228E-02 |
| E147 | 4.332 | 286 | 1.001E-03 | E147 | 4.228 | 293 | 1.319E-02 |
| E148 | 4.334 | 286 | 2.332E-02 | E148 | 4.229 | 293 | 8.418E-04 |
| E149 | 4.348 | 285 | 2.425E-02 | E149 | 4.244 | 292 | 1.477E-02 |
| E150 | 4.355 | 285 | 1.669E-03 | E150 | 4.248 | 292 | 9.467E-03 |
| E151 | 4.357 | 285 | 8.260E-04 | E151 | 4.250 | 292 | 3.735E-02 |
| E152 | 4.368 | 284 | 8.693E-03 | E152 | 4.260 | 291 | 1.161E-01 |
| E153 | 4.397 | 282 | 4.145E-02 | E153 | 4.286 | 289 | 6.536E-02 |
| E154 | 4.405 | 281 | 1.216E-02 | E154 | 4.297 | 289 | 5.053E-02 |
| E155 | 4.470 | 277 | 4.251E-02 | E155 | 4.342 | 286 | 1.244E-02 |
| E156 | 4.516 | 275 | 6.012E-02 | E156 | 4.387 | 283 | 5.314E-03 |
| E157 | 4.523 | 274 | 1.010E-01 | E157 | 4.410 | 281 | 5.193E-02 |
| E158 | 4.528 | 274 | 1.444E-01 | E158 | 4.428 | 280 | 2.391E-03 |
| E159 | 4.542 | 273 | 3.614E-02 | E159 | 4.438 | 279 | 2.482E-02 |
| E160 | 4.570 | 271 | 2.701E-02 | E160 | 4.442 | 279 | 1.130E-02 |

## References

- [S1] A. Jouaiti, L. Ballerini, H. Shen, R. Viel, F. Polo, N. Kyritsakas, S. Haacke, Y. Huang, C. Lu, C. Gourlaouen, H. Su, M. Mauro, *Angew. Chem. Int. Ed.* 2023, **62**, e202305569.
- [S2] G. A. Crosby, J. N. Demas, *J. Am. Chem. Soc.* 1970, **92**, 7262.
- [S3] H. Ishida, S. Tobita, Y. Hasegawa, R. Katoh, K. Nozaki, *Coord. Chem. Rev.* 2010, **254**, 2449.
- [S4] J. R. Lakowicz, in *Principles of Fluorescence Spectroscopy*, 3rd Ed., Springer, New York, 2006.
- [S5] S. Antonello, M. Musumeci, D. D. M. Wayner, F. Maran, *J. Am. Chem. Soc.* 1997, **119**, 9541.
- [S6] A. Belèn Meneses, S. Antonello, M. C. Arévalo, F. Maran, *Electroanalysis* 2006, **18**, 363.
- [S7] P. J. Stephens, F. J. Devlin, C. F. Chabalowski, M. J. Frisch, *J. Phys. Chem.* 1994, **98**, 11623.
- [S8] E. Van Lenthe, R. Van Leeuwen, E. J. Baerends, J. G. Snijders, C. Nieuwpoort, R. Broer, P. J. C. Aerts, P. S. Bagus, *Int. J. Quantum Chem.* 1996, **57**, 281.
- [S9] F. Wang, T. Ziegler, *J. Chem. Phys.* 2005, **123**, 154102.
- [S10] F. Wang, T. Ziegler, E. van Lenthe, S. van Gisbergen, E. J. Baerends, *J. Chem. Phys.* 2005, **122**, 204103.
- [S11] A. Klamt, *J. Phys. Chem.* 1995, **99**, 2224.
- [S12] S. Grimme, J. Antony, S. Ehrlich, H. Krieg, *J. Chem. Phys.* 2010, **132**, 154104.
- [S13] M. J. G. Peach, D. J. Tozer, *J. Phys. Chem A* 2012, **116**, 9783.
- [S14] F. Plasser, *J. Chem. Phys.* 2020, **152**, 084108.
- [S15] T. D. Goddard, C. C. Huang, E. C. Meng, E. F. Pettersen, G. S. Couch, J. H. Morris, T. E. Ferrin, *Protein Sci.* 2018, **27**, 14.
- [S16] "M86-EXX278V1 APEX4 User Manual", Bruker Corporation, 2021.
- [S17] G. M. Sheldrick, *Acta Cryst.* 2015, **A71**, 3-8.
- [S18] G. M. Sheldrick, *Acta Cryst.* 2015, **C71**, 3-8.
- [S19] "M86-EXX229V1 APEX3 User Manual", Bruker AXS Inc., Madison, USA, 2016.
- [S20] A. L. Spek, *J. Appl. Crystallogr.* 2003, **36**, 7.
